# Supplementary material for: Increased Expression of the Δ133p53β Isoform Enhances Brain Metastasis
Source: MDPI journal article supplement (doi:10.3390/ijms24021267), 2023-01-09
Supplement: s1 [file s1]

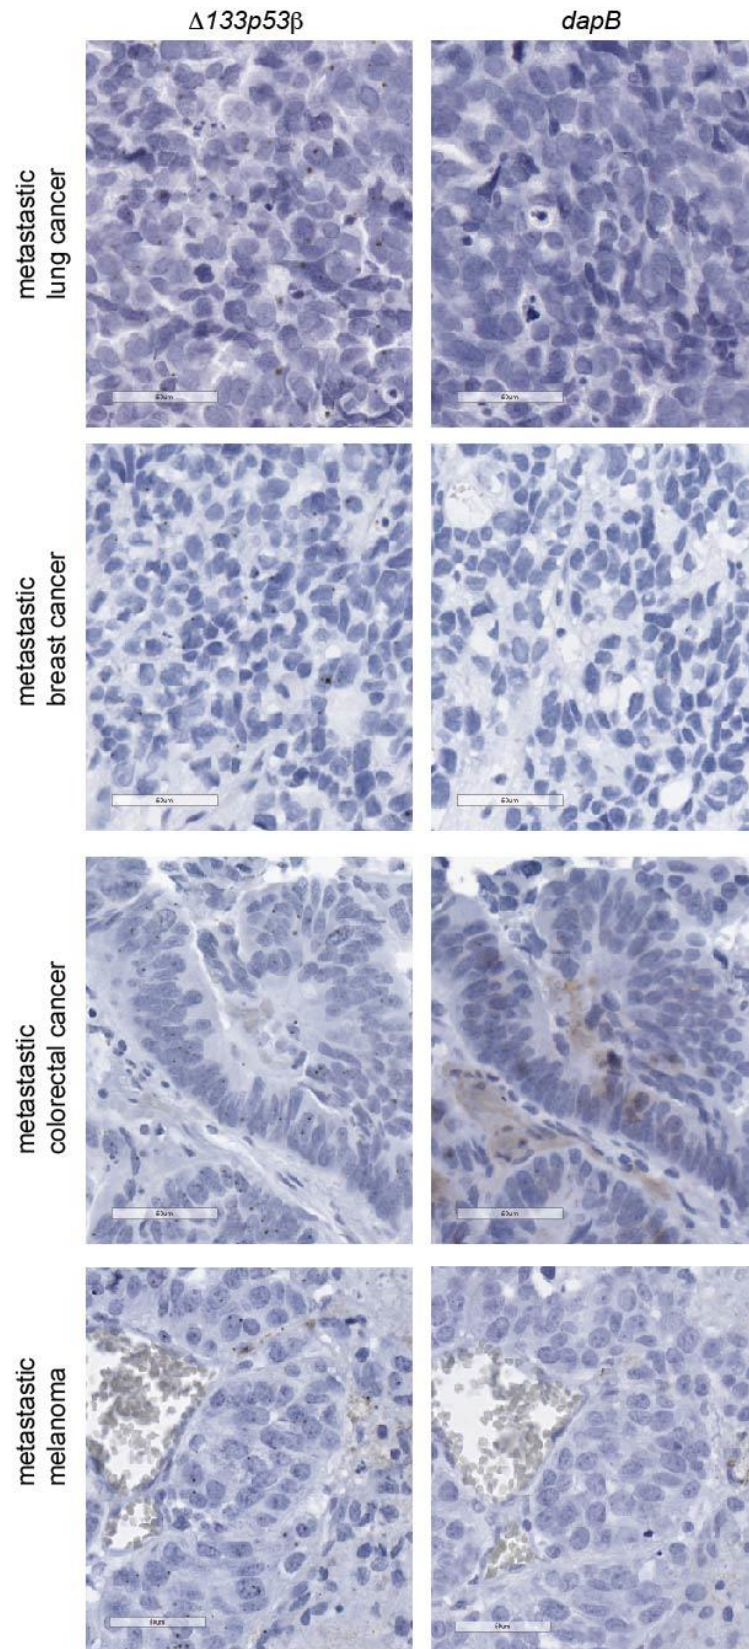

**Supplementary Figure S1.** Additional examples of  $\Delta 133p53\beta$  mRNA expression in brain metastases. RNAscope was used to detect  $\Delta 133p53\beta$  mRNA and *dapB* was used as a negative control. Images taken at 400x magnification. Scale bar, 50  $\mu$ m.

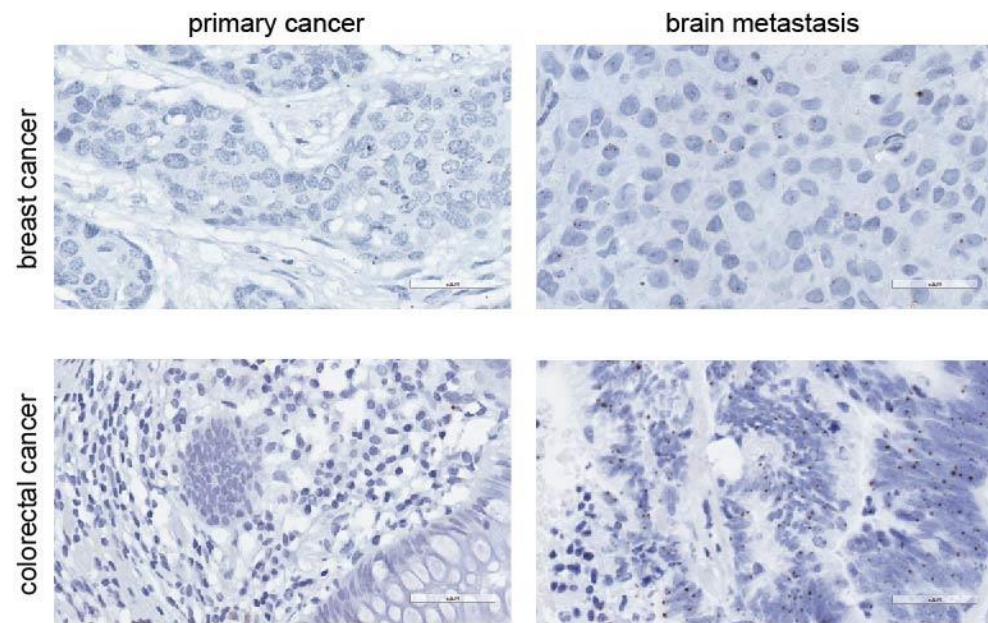

**Supplementary Figure S2.** Additional examples of  $\Delta 133p53\beta$  mRNA expression in brain metastases and the corresponding primary tumor. Images taken at 400x magnification. Scale bar, 50  $\mu\text{m}$ .
