# Supplementary material for: Increased Expression of the Δ133p53β Isoform Enhances Brain Metastasis
Source: Int J Mol Sci. 2023 Jan 9;24(2):1267. doi: 10.3390/ijms24021267 (PMC9866425; doi:10.3390/ijms24021267)
Supplement: Supplementary file 1 [file ijms-24-01267-s001.zip › Supplementary File 1.xlsx]

## Sheet: A1
	logFC	AveExpr	t	P.Value	adj.P.Val	B
CTPS2	7.16771	1.52964	19.7726	5.33534e-15	1.06647e-11	23.6691
NR0B1	7.12523	1.85647	23.4788	1.71242e-16	6.16127e-13	26.5022
LINC02780	7.04476	-0.702579	13.9777	4.54577e-12	3.55559e-09	17.632
CRACR2A	5.11159	0.769537	13.6	7.63011e-12	5.27945e-09	17.1484
RSPO4	5.10747	0.444747	11.5588	1.55339e-10	7.9844e-08	14.2916
ENSG00000284703	4.77231	-2.40868	14.3072	2.92024e-12	2.38796e-09	18.0434
LRRC4C	4.51644	1.6098	7.252	3.96133e-07	7.42337e-05	6.62249
GAP43	4.48503	-0.401966	8.23177	5.42059e-08	1.35439e-05	8.58811
EPHB6	4.45241	-2.73206	6.10275	4.80299e-06	0.000583822	4.14863
ANXA3	4.31798	3.30529	17.996	3.43213e-14	4.74953e-11	22.0597
LRMDA	4.24438	-1.95499	10.1479	1.5881e-09	6.07872e-07	12.0465
MAD1L1	4.14598	2.52675	7.59269	1.95496e-07	3.99656e-05	7.32138
ZNF22-AS1	4.06943	-0.688406	8.52477	3.0656e-08	8.11032e-06	9.14954
ZNF22	4.05433	2.58695	17.8921	3.84619e-14	4.94236e-11	21.9597
MTND2P28	4.02973	1.69034	8.65633	2.38207e-08	6.69586e-06	9.39772
STXBP6	4.01215	-2.40295	5.0293	5.68412e-05	0.00366514	1.70105
GDNF	3.94798	0.934994	8.54403	2.95401e-08	7.93173e-06	9.18603
COL4A6	3.92317	-0.270431	9.61761	4.03128e-09	1.29505e-06	11.1388
ESX1	3.9216	-2.83487	5.56198	1.6436e-05	0.00144236	2.92892
ARHGAP6	3.79642	-1.25923	6.1927	3.92701e-06	0.00048722	4.34836
ENSG00000279497	3.75401	-1.61909	4.76238	0.000106744	0.0060518	1.07901
KRT8P10	3.63758	-1.26047	6.54932	1.78499e-06	0.000254857	5.13042
BASP1	3.54973	4.15118	13.7526	6.18122e-12	4.448e-09	17.3454
OR7E19P	3.49103	-0.368868	3.53472	0.00197766	0.0431772	-1.77457
LINC01173	3.46728	-1.29615	6.46882	2.12976e-06	0.00029026	4.95528
LINC01515	3.37861	-1.74982	6.4086	2.43183e-06	0.000324064	4.82372
TP53	3.36447	8.26434	10.0556	1.86305e-09	6.82853e-07	11.8912
SLITRK3	3.36392	-2.5886	5.7107	1.16806e-05	0.00111502	3.2674
ENSG00000286913	3.35341	-1.16791	8.01597	8.30835e-08	1.9929e-05	8.16683
KRT18P17	3.33515	-2.11526	5.12276	4.5641e-05	0.00308696	1.91796
RPS26P15	3.30353	-1.54953	4.25063	0.000360686	0.0143051	-0.118087
TNIP3	3.29794	-2.49885	3.7937	0.00107137	0.0299751	-1.18077
GDNF-AS1	3.28663	-0.853665	7.28615	3.68799e-07	6.98389e-05	6.69329
PID1	3.25549	-2.49877	5.74234	1.08651e-05	0.00106811	3.33914
CREG2	3.25206	-2.37319	4.44799	0.000225315	0.0101844	0.343633
KNOP1P5	3.2412	-1.9765	5.46553	2.05363e-05	0.0017264	2.70829
ENSG00000260328	3.22358	-0.0392393	13.8933	5.09863e-12	3.82185e-09	17.5251
PTCHD1	3.19963	1.86889	7.78768	1.31416e-07	2.99263e-05	7.714
ENSG00000280202	3.15939	-1.50453	7.15865	4.82018e-07	8.50148e-05	6.42815
SIRPAP1	3.15381	-2.0764	3.93275	0.000769663	0.0247415	-0.858895
PPP1R1C	3.13069	-0.667482	5.6838	1.24229e-05	0.00115797	3.20633
HTRA3	3.12696	-1.596	3.77664	0.00111568	0.0306428	-1.22014
DUSP23	3.08753	0.731652	3.58601	0.00175231	0.0398535	-1.65768
CALHM5	3.03238	1.68599	11.8062	1.05603e-10	5.92432e-08	14.6612
PTPN20	3.02796	-2.78204	4.56502	0.000170538	0.00859377	0.617523
CDX2	3.0259	-2.1117	6.05587	5.33655e-06	0.000635791	4.04415
STAT6	2.98465	2.8101	12.2895	5.05353e-11	3.2469e-08	15.3641
ENSG00000233470	2.93871	-2.21841	5.87981	7.94425e-06	0.000860946	3.64958
TP53I11	2.92165	-1.86978	5.78515	9.85356e-06	0.00101295	3.43602
ADCY1	2.90146	-2.768	5.54846	1.69564e-05	0.00147365	2.89804
APCDD1L-DT	2.89841	-0.775252	4.26563	0.000348009	0.014069	-0.0830228
ARHGAP20	2.87026	-3.53318	5.06312	5.24985e-05	0.00344689	1.77959
TMSB15A	2.85023	-0.821518	5.8619	8.27408e-06	0.000880774	3.60924
CCNA1	2.78328	2.55857	7.62238	1.83963e-07	3.80402e-05	7.38151
CEP164P1	2.7746	0.88579	3.72756	0.00125348	0.0330162	-1.3332
TTC9	2.75104	0.257187	4.03361	0.000605243	0.0211896	-0.624453
CDYL2	2.73711	2.49685	7.50901	2.3219e-07	4.64123e-05	7.15123
YBX2	2.70593	4.53622	6.16696	4.15955e-06	0.000512536	4.2913
HIKESHIP1	2.68377	-1.91256	5.76176	1.03937e-05	0.00103879	3.38312
KCNK13	2.68376	0.379515	7.63439	1.79501e-07	3.75492e-05	7.40578
SENCR	2.66813	-1.12921	4.29853	0.000321747	0.0133369	-0.00609593
ENSG00000267251	2.63891	-2.03207	5.63714	1.38262e-05	0.00125118	3.10026
ENSG00000279675	2.6311	-2.12855	3.60905	0.00165948	0.0388218	-1.60504
LINC01896	2.60829	5.63949	4.63005	0.000146112	0.00768455	0.769683
FTH1P8	2.59951	-1.56659	4.67673	0.000130783	0.00717312	0.878846
ITGB2	2.57964	-1.34904	3.63189	0.00157227	0.0373648	-1.5528
ENSG00000250284	2.5645	-0.234638	6.52553	1.88047e-06	0.000265126	5.07874
NKX2-2	2.54661	0.778651	6.96106	7.32997e-07	0.000120768	6.01285
DSP-AS1	2.53116	0.0982304	3.81647	0.00101494	0.0290449	-1.12817
ENSG00000286634	2.53003	-2.01681	3.6588	0.00147525	0.0362781	-1.49113
TNIK	2.51744	3.26332	7.00516	6.67239e-07	0.000114088	6.10599
ARHGAP22	2.51292	0.0088169	4.01461	0.000633292	0.0218255	-0.668679
RPS2P32	2.50844	1.07226	4.60798	0.000153978	0.00798291	0.718054
LINC01444	2.49839	-1.25745	5.26952	3.23818e-05	0.00241929	2.25744
NKX2-2-AS1	2.49418	-0.210754	6.50831	1.9528e-06	0.000272333	5.04131
ENSG00000275216	2.4935	3.40301	6.92843	7.85927e-07	0.000125122	5.94375
FAM189A2	2.48558	0.499936	6.22511	3.65307e-06	0.000462808	4.42009
DTX4	2.4729	-0.427167	8.69467	2.21417e-08	6.32269e-06	9.46959
PWWP3B	2.46252	-3.61082	4.19978	0.000407201	0.0156555	-0.23691
CDA	2.44482	-1.78578	4.49949	0.000199311	0.00946614	0.464171
KRT8	2.39793	10.6398	6.94827	7.53289e-07	0.000122087	5.98578
ENSG00000266088	2.39724	-0.373763	3.89328	0.000845502	0.0260902	-0.950448
CDC20-DT	2.38135	-1.24818	3.46944	0.00230612	0.047577	-1.92278
COL16A1	2.37968	1.95148	5.29472	3.05342e-05	0.00231776	2.31558
MYO1D	2.36647	-0.584176	5.19417	3.86128e-05	0.00271345	2.08333
TNS1	2.35022	-0.982497	3.58631	0.00175107	0.0398535	-1.657
KRT8P3	2.34808	3.22389	11.7365	1.17653e-10	6.22521e-08	14.5578
IGFBP6	2.32258	4.76462	3.44622	0.00243539	0.0495618	-1.97531
GPSM3	2.29928	3.09412	4.65313	0.000138318	0.00736194	0.823669
EIF4E3	2.29736	-2.59159	4.00477	0.00064831	0.0220649	-0.691555
ERC2	2.29664	1.24461	11.2314	2.61434e-10	1.23768e-07	13.7916
PDLIM1	2.29064	3.48691	3.59937	0.00169789	0.0392909	-1.62718
KRT8P45	2.2796	-0.980798	5.87657	8.00288e-06	0.000862107	3.64228
RPRM	2.27111	1.45074	5.78173	9.9306e-06	0.00101506	3.4283
PCSK5	2.26606	-0.900016	4.06353	0.000563574	0.0199974	-0.554783
FRMPD3	2.2628	-0.532753	5.41319	2.31836e-05	0.00187871	2.58821
DUSP4	2.25063	-0.359871	5.84602	8.57816e-06	0.000902463	3.57345
SIRPA	2.2471	2.36661	4.00808	0.000643229	0.0220413	-0.683877
NMU	2.24429	1.89327	4.89777	7.74964e-05	0.00472597	1.39491
ENSG00000276170	2.23982	3.09009	5.22224	3.61605e-05	0.00259174	2.14824
ENSG00000273063	2.23544	-1.95022	3.70767	0.00131402	0.0339643	-1.37895
MACROH2A2	2.23479	2.2739	4.13899	0.000470753	0.0175702	-0.378849
GAS6	2.23384	5.09943	6.62809	1.50297e-06	0.000221627	5.30097
CIART	2.2281	2.10458	8.9363	1.40292e-08	4.20643e-06	9.91784
SDF2L1	2.21628	4.62176	3.46557	0.00232719	0.0477924	-1.93154
LINC01094	2.21218	-1.07767	4.2621	0.000350955	0.0141228	-0.0912843
CYP4F35P	2.19627	1.44907	3.44529	0.00244072	0.0496141	-1.97742
DPYSL5	2.18993	1.53792	5.68988	1.22508e-05	0.00115388	3.22016
TMEM108	2.18785	-0.892989	3.52371	0.00202968	0.0437816	-1.79963
ENSG00000236453	2.16683	2.10217	6.43456	2.29653e-06	0.000308318	4.8805
DERL3	2.15707	1.95648	4.52027	0.000189694	0.00929862	0.512801
ZNF703	2.12164	0.788027	4.24462	0.000365897	0.0144037	-0.132142
FTH1	2.10967	9.47672	4.35001	0.000284579	0.0122478	0.114325
MSX1	2.1022	2.6787	6.39504	2.50571e-06	0.000331453	4.79403
MIR7111	2.09808	-1.47548	3.88312	0.000866189	0.0263222	-0.973984
RTN4R	2.08688	1.10596	3.81581	0.00101653	0.0290449	-1.1297
PPP1R14A	2.08429	1.82497	3.52567	0.00202032	0.0436845	-1.79517
LANCL3	2.07981	-0.637419	4.65652	0.000137208	0.00732457	0.8316
MISP	2.05504	1.63645	3.45129	0.00240659	0.0491425	-1.96386
LTA	2.04626	-1.55893	6.52409	1.88639e-06	0.000265126	5.07563
RGS16	2.03247	-0.426841	3.99927	0.000656868	0.0221708	-0.704353
BEST1	2.03109	9.05528	4.34033	0.000291226	0.0124028	0.0916687
ZNF503	2.01998	2.58673	9.57858	4.32315e-09	1.36445e-06	11.0706
EBF3	1.99585	0.955032	5.22994	3.55155e-05	0.00256596	2.16604
ENSG00000231424	1.98397	-2.25462	3.85882	0.000917744	0.0274256	-1.03026
DPF3	1.94414	0.945316	5.05678	5.32858e-05	0.00348586	1.76488
ENSG00000287287	1.94198	1.35844	4.72917	0.000115485	0.00647217	1.00143
GAS6-DT	1.93643	0.477659	3.83849	0.000963192	0.0281296	-1.07728
HMOX1	1.93596	6.21001	3.66456	0.00145531	0.0359628	-1.47794
ARHGEF16	1.92306	3.5083	4.81514	9.42099e-05	0.00552064	1.2022
LINC01186	1.92001	1.18019	4.68939	0.000126911	0.00700346	0.908454
KRT34	1.91851	-0.219494	3.50161	0.00213808	0.0454809	-1.84983
TCP11	1.9137	2.05547	6.07466	5.11579e-06	0.000613554	4.08605
FGF1	1.89674	4.24006	5.08544	4.98171e-05	0.0033193	1.8314
NMNAT3	1.89606	0.276924	5.79355	9.66659e-06	0.000999436	3.45501
ENSG00000283403	1.87862	-1.27625	4.30677	0.000315489	0.0131686	0.0131661
HKDC1	1.8771	-0.850219	3.45363	0.0023934	0.0489286	-1.95856
SH3GL2	1.87546	0.159227	5.6349	1.38976e-05	0.00125118	3.09516
CREB3L1	1.86273	4.035	5.26586	3.26598e-05	0.00241929	2.24898
KRT18	1.84899	10.366	4.66351	0.000134952	0.0072862	0.847931
HLA-F	1.84787	0.317912	6.74012	1.17848e-06	0.000179669	5.54214
PPP1R14B-AS1	1.84317	2.4414	3.88561	0.000861065	0.0262552	-0.968208
ZNF503-AS2	1.84057	1.65946	6.71102	1.25514e-06	0.000189748	5.47965
STX1B	1.83999	0.0929168	3.48403	0.00222838	0.0467232	-1.88972
KIF26A	1.83857	2.00758	6.9576	7.38438e-07	0.000120768	6.00552
DPF1	1.82139	5.40279	5.70919	1.17211e-05	0.00111502	3.26397
PLEK2	1.80333	5.35772	5.12702	4.51879e-05	0.00307928	1.92782
NRN1	1.79113	4.69457	9.66369	3.71287e-09	1.26028e-06	11.2192
PLPP3	1.77756	0.265564	3.71621	0.00128766	0.0335459	-1.3593
ID3	1.77623	6.5254	3.56461	0.00184309	0.0412403	-1.7065
FOXG1-AS1	1.77551	-0.485623	4.30447	0.000317225	0.0132104	0.00778502
UCP2	1.76623	5.8082	4.18661	0.0004202	0.0159739	-0.267674
ENSG00000248161	1.75886	1.32377	4.42887	0.000235815	0.0105167	0.298881
WNT5B	1.74747	6.13353	4.49711	0.000200445	0.00948949	0.458591
ENSG00000280287	1.72762	0.922261	5.00147	6.06891e-05	0.00387162	1.63633
OSGIN1	1.7228	5.58772	3.95449	0.000730828	0.0239483	-0.808425
HSD11B2	1.71628	-0.273485	4.78216	0.000101858	0.00585439	1.12522
KRT8P36	1.71032	-1.55373	4.55917	0.000172926	0.0086251	0.60384
GAS6-AS1	1.71021	3.03994	6.25746	3.39913e-06	0.000433691	4.49155
BIK	1.70929	-0.0100133	3.80036	0.00105456	0.0297359	-1.1654
LINC01117	1.70588	-0.489825	4.33361	0.000295928	0.0124971	0.0759539
KRT8P33	1.69857	-0.705733	3.96306	0.000716065	0.0237605	-0.788526
ENSG00000274677	1.69434	-1.33556	3.6398	0.00154311	0.0370229	-1.53468
IL4I1	1.68486	-1.54118	3.46479	0.00233147	0.0478258	-1.93331
ENSG00000272159	1.68463	4.21765	5.23326	3.52416e-05	0.00255644	2.1737
SUN3	1.68358	2.81603	5.5559	1.66681e-05	0.00145563	2.91503
RPL12P14	1.68069	2.28952	4.2945	0.000324853	0.0133732	-0.0155176
ENSG00000258881	1.67005	0.792702	3.6134	0.00164251	0.038475	-1.5951
KRBA1	1.66007	1.41574	4.96843	6.55994e-05	0.00412634	1.55948
ZCCHC18	1.65997	-0.731267	4.68496	0.000128254	0.0070559	0.898086
SFTA1P	1.64702	4.94593	4.23056	0.000378375	0.0147657	-0.164999
HIF1A-AS3	1.64561	0.882929	3.66179	0.00146488	0.0361002	-1.4843
ENSG00000267069	1.64195	0.336268	3.87561	0.000881797	0.0266614	-0.99137
HOXD9	1.6389	3.96735	4.27907	0.000337034	0.0137177	-0.0516089
OR2W3	1.63719	1.33764	4.88401	8.0054e-05	0.00484137	1.36286
SBF1P1	1.63586	-1.75096	3.80299	0.001048	0.0295972	-1.15933
LINC00705	1.63445	0.62123	3.74345	0.0012071	0.0322822	-1.29661
BDH1	1.62898	-0.514656	3.789	0.00108341	0.0301712	-1.19163
FTL	1.62732	11.111	3.50147	0.00213879	0.0454809	-1.85015
SCUBE3	1.62665	-0.768376	3.87263	0.000888064	0.0267609	-0.998264
ENSG00000283633	1.62659	2.95916	5.90934	7.42945e-06	0.000819974	3.71601
HMX2	1.6197	0.87349	3.72855	0.00125056	0.0329875	-1.33093
TRMT61A	1.60226	6.36026	3.49076	0.00219336	0.0462044	-1.87445
LINC00513	1.59498	5.0189	4.06626	0.000559919	0.0199464	-0.548427
VEGFD	1.58869	-1.51311	3.90596	0.000820366	0.0256668	-0.921054
SPECC1	1.57811	5.26784	10.6568	6.69662e-10	2.738e-07	12.884
IPO4	1.56619	-1.31399	3.9061	0.000820087	0.0256668	-0.920722
HYI	1.5636	5.66758	4.3437	0.000288892	0.0123742	0.0995646
GHDC	1.55993	2.42938	3.84633	0.000945409	0.0278362	-1.05916
ENSG00000257086	1.559	1.89816	3.64685	0.00151758	0.0367941	-1.51853
CHST4	1.55459	2.82039	4.18254	0.000424302	0.0160361	-0.277187
LSR	1.54645	4.11165	3.49645	0.00216417	0.0459121	-1.86153
LINC01116	1.53784	2.82222	6.05053	5.40104e-06	0.000639241	4.03224
RBPMS-AS1	1.5305	-0.0046584	3.59138	0.00173021	0.0396641	-1.64541
ENSG00000223461	1.52681	-1.5813	3.44265	0.0024559	0.049754	-1.98339
PKP3	1.52316	3.52728	3.71537	0.00129024	0.0335459	-1.36124
BMP4	1.52131	0.310248	5.62089	1.43522e-05	0.00128456	3.06326
A1CF	1.52114	-1.41869	4.10501	0.000510492	0.0186283	-0.458102
LINC02057	1.51725	-0.666381	4.50126	0.000198472	0.00946614	0.468315
CAMK2N1	1.50506	1.08319	5.09283	4.89605e-05	0.00327435	1.84855
SMARCA2-AS1	1.50015	-1.08745	4.50197	0.000198137	0.00946614	0.46998
DGCR11	1.50005	0.721118	4.40281	0.000250923	0.0110369	0.237887
GREB1	-1.50217	0.40474	-3.72899	0.00124923	0.0329875	-1.32991
FOXE1	-1.503	1.64804	-4.35391	0.000281945	0.0121635	0.12345
KIF5A	-1.5117	1.18456	-3.78085	0.00110458	0.0304777	-1.21043
ENSG00000253645	-1.51811	-0.34299	-3.70387	0.0013259	0.0340218	-1.38768
MARF1	-1.52708	4.51375	-4.01992	0.000625321	0.0215922	-0.656316
PCTP	-1.52862	3.25279	-9.87226	2.56653e-09	8.87919e-07	11.5793
SPATA6	-1.532	1.79827	-5.96426	6.56104e-06	0.000737706	3.83928
ERCC6L	-1.53237	4.72849	-3.64138	0.00153734	0.037016	-1.53105
EMP2	-1.53563	1.74733	-3.5923	0.00172645	0.0396641	-1.64331
CEACAM19	-1.55075	0.591888	-4.26066	0.000352164	0.0141228	-0.0946534
TNS3	-1.55645	2.48389	-4.16001	0.00044773	0.0168156	-0.329787
GDA	-1.56902	4.2277	-5.63452	1.39097e-05	0.00125118	3.09429
BARX2	-1.57364	0.271088	-3.8882	0.00085578	0.0262354	-0.962213
PRTFDC1	-1.58036	4.06431	-6.98131	7.02011e-07	0.00011803	6.05565
TMEM87B	-1.58465	3.83524	-3.85195	0.000932859	0.0276748	-1.04615
ENSG00000261490	-1.5866	-0.798124	-3.65138	0.0015014	0.0365991	-1.50815
NIPA1	-1.58848	5.65297	-3.54391	0.0019353	0.0425625	-1.75366
TAS2R14	-1.59419	-0.797759	-4.19467	0.0004122	0.0158112	-0.248856
HSF2BP	-1.59476	-0.969692	-3.79829	0.00105976	0.0298129	-1.17018
VLDLR	-1.59538	4.00407	-5.66393	1.30017e-05	0.00119576	3.16119
KLF9	-1.59658	2.82957	-3.92333	0.000787122	0.0249741	-0.880753
ENSG00000283696	-1.60163	-1.19626	-3.76172	0.0011559	0.0314117	-1.25453
PNPLA3	-1.60394	-0.642719	-4.28023	0.0003361	0.0137107	-0.0488875
ZC3H12B	-1.60655	0.217067	-3.64208	0.00153483	0.0370128	-1.52947
PLCH1	-1.63271	0.750072	-4.24989	0.000361326	0.0143051	-0.119824
IL1R1	-1.63413	1.20242	-3.50797	0.00210628	0.0450558	-1.83538
NES	-1.64615	-0.03671	-3.75152	0.00118423	0.0318932	-1.27805
ZNF280D	-1.66018	1.91677	-5.73528	1.10419e-05	0.00107375	3.32314
HSPA2	-1.66952	2.22497	-5.74511	1.07966e-05	0.0010672	3.34541
AFAP1	-1.67019	5.35582	-4.25757	0.00035477	0.0141829	-0.101879
NLRP11	-1.67122	-1.88866	-3.8129	0.0010236	0.0290449	-1.13643
IGFBPL1	-1.67708	2.51567	-4.45174	0.000223315	0.0101195	0.352392
CCDC92B	-1.68463	-1.4006	-4.55131	0.000176188	0.00873173	0.585454
ENSG00000287769	-1.68652	-1.12977	-4.80413	9.66962e-05	0.00559345	1.17651
MAFA	-1.69119	-1.21871	-3.72916	0.00124874	0.0329875	-1.32953
PPP2R2C	-1.69152	0.783128	-5.79607	9.61129e-06	0.000999436	3.4607
MYCL	-1.69688	-1.19904	-3.52199	0.00203788	0.0438534	-1.80352
BRSK2	-1.69975	-0.386819	-4.41615	0.000243073	0.0107178	0.269105
PATL2	-1.701	-0.585245	-3.9194	0.000794532	0.0251206	-0.889883
ATP13A3-DT	-1.70798	1.87502	-4.20949	0.000397879	0.0153932	-0.214229
RNF212	-1.70909	1.21929	-6.56838	1.71212e-06	0.000246409	5.17176
NRBP2	-1.71234	2.28868	-3.69023	0.00136947	0.0347485	-1.41903
EVC2	-1.73343	3.18396	-11.5034	1.69525e-10	8.2426e-08	14.2078
ECI2-DT	-1.74309	-1.98296	-3.4785	0.00225753	0.0470057	-1.90225
MAML3	-1.75247	1.41083	-3.94497	0.000747592	0.0243204	-0.830535
LINC00205	-1.7557	4.0488	-4.50666	0.000195937	0.00945016	0.480957
FRMD5	-1.76035	0.349997	-5.21099	3.71238e-05	0.00262012	2.12223
H6PD	-1.77099	2.86773	-3.89498	0.000842071	0.026029	-0.946488
PCDHB14	-1.7843	0.0644966	-4.62889	0.000146515	0.00768455	0.766973
ENSG00000224848	-1.79194	0.0887262	-4.25077	0.000360567	0.0143051	-0.117764
F11-AS1	-1.79331	-1.17655	-4.57028	0.000168414	0.00851065	0.629852
TRPS1	-1.79881	2.39855	-4.29495	0.000324506	0.0133732	-0.0144696
MKRN9P	-1.84667	-1.31489	-3.78985	0.00108121	0.0301565	-1.18965
ZNF558	-1.86383	0.913824	-5.56253	1.64153e-05	0.00144236	2.93017
ENSG00000228549	-1.86439	-1.29829	-3.71533	0.00129037	0.0335459	-1.36134
MINDY4	-1.87135	-2.3552	-3.58407	0.00176035	0.0399353	-1.66211
PCDHB11	-1.87563	-0.123748	-4.6598	0.000136147	0.00731127	0.839253
LIMCH1	-1.88492	1.9367	-4.6625	0.000135275	0.0072862	0.845582
LINC02046	-1.88797	-1.69739	-5.34676	2.70508e-05	0.00210668	2.43547
JDP2-AS1	-1.88804	-0.808266	-3.68142	0.00139832	0.0351338	-1.43924
SLC40A1	-1.89401	-0.28953	-3.62249	0.00160759	0.0378542	-1.57431
ENSG00000256013	-1.89911	-1.42151	-4.37963	0.000265178	0.011579	0.183631
TFR2	-1.90307	-1.36054	-5.75498	1.0556e-05	0.00104918	3.36776
ATF7IP2	-1.9067	0.436002	-5.03813	5.56736e-05	0.00360276	1.72155
GARIN5A	-1.91094	-0.427739	-4.9558	6.75811e-05	0.00420686	1.53008
OGT	-1.91588	6.92127	-3.55629	0.0018796	0.0416942	-1.72545
PCDHB1-AS1	-1.92191	1.15296	-5.47862	1.9924e-05	0.00169072	2.73827
ZIC1	-1.92949	0.942195	-4.98464	6.31408e-05	0.00400901	1.59721
PCDHB2	-1.92961	1.67871	-6.04455	5.47419e-06	0.000643665	4.01889
HSPB8	-1.93582	1.16818	-3.57788	0.00178624	0.0403089	-1.67622
ENSG00000274718	-1.93762	-0.855298	-3.67424	0.00142231	0.0353807	-1.45572
NNT-AS1	-1.94024	1.52483	-6.5836	1.65613e-06	0.000242227	5.20473
ADAMTSL4	-1.94232	1.58089	-4.4766	0.000210473	0.00978401	0.4106
NPTX1	-1.94646	-1.00052	-5.32427	2.85042e-05	0.00219141	2.38367
ENSG00000274220	-1.94828	-0.255711	-4.03132	0.000608552	0.021258	-0.629777
LAYN	-1.95002	1.77874	-6.91762	8.04321e-07	0.000125824	5.92082
GJA1	-1.95568	-0.897937	-4.21123	0.000396235	0.0153627	-0.210175
ZNF556	-1.95613	1.28773	-5.04812	5.4382e-05	0.00354468	1.74475
RAB20	-1.95659	-0.169042	-4.84203	8.84049e-05	0.00524886	1.26494
ARHGEF37	-1.96207	-1.51774	-3.814	0.00102093	0.0290449	-1.1339
LINC01232	-1.97078	-1.36166	-4.67418	0.000131576	0.00719283	0.872893
CCL28	-1.97122	0.605669	-6.66446	1.38859e-06	0.000208173	5.37946
GATM	-1.97489	-0.688791	-3.9952	0.000663279	0.0223035	-0.713831
LINC00235	-1.97606	-1.92438	-6.27227	3.28903e-06	0.00042264	4.52421
ENSG00000231305	-1.97921	-1.09138	-6.49985	1.9894e-06	0.000275303	5.02289
GALNT6	-1.98053	2.33109	-5.76335	1.0356e-05	0.00103879	3.38672
OLFM2	-1.98094	-1.7363	-4.55998	0.000172592	0.0086251	0.605744
FBXL7	-1.98377	-1.03639	-3.46677	0.00232066	0.0477174	-1.92883
IFI16	-1.99345	-1.00262	-3.92614	0.00078187	0.0248953	-0.874229
ENSG00000265417	-2.0082	0.74305	-4.63036	0.000146005	0.00768455	0.770406
SERPINB9	-2.01318	-0.062954	-4.38485	0.000261898	0.0114916	0.195851
EMC10	-2.01968	3.89124	-5.07058	5.15858e-05	0.00339937	1.79692
ZNF793	-2.02165	2.06669	-4.82824	9.13349e-05	0.00538726	1.23278
ANKEF1	-2.03596	-1.19251	-4.96673	6.58618e-05	0.00412841	1.55553
ENSG00000269896	-2.04275	-0.518593	-3.74476	0.00120336	0.0322631	-1.2936
PDGFRB	-2.05893	-1.16023	-5.38439	2.47862e-05	0.00197302	2.52203
ENSG00000286535	-2.06989	-1.00425	-3.60054	0.00169318	0.0392658	-1.62449
ENSG00000268854	-2.10798	2.16911	-3.89504	0.000841949	0.026029	-0.946346
PREX1	-2.11323	0.764118	-3.67342	0.00142508	0.0353807	-1.45761
WDR88	-2.11457	-0.515781	-3.60724	0.00166658	0.0388364	-1.60917
ZNF608	-2.11966	0.276876	-3.44336	0.00245179	0.0497268	-1.98178
ENSG00000225032	-2.14051	0.0677955	-4.01028	0.000639857	0.0219809	-0.678746
DNAH10	-2.14835	-1.86078	-3.51315	0.00208077	0.0445632	-1.82362
USP44	-2.14936	1.63966	-5.80379	9.44352e-06	0.000987726	3.47816
CRYZL2P	-2.15538	0.34422	-7.2286	4.16058e-07	7.71234e-05	6.57389
SLC16A2	-2.15709	1.59797	-3.87484	0.000883419	0.0266656	-0.993159
LIF	-2.15771	2.49201	-7.22397	4.20128e-07	7.71234e-05	6.56426
ROR2	-2.17202	0.150473	-4.28512	0.000332205	0.0136136	-0.0374618
APOBEC3D	-2.17258	-1.46733	-5.97678	6.37799e-06	0.000727523	3.86734
PADI2	-2.18516	-2.33749	-3.52567	0.00202031	0.0436845	-1.79517
ZNF217	-2.18866	4.80794	-3.81615	0.00101573	0.0290449	-1.12893
PXDN	-2.19189	4.19918	-5.51138	1.84711e-05	0.00158235	2.81328
ENSG00000283529	-2.20126	-1.6624	-5.19154	3.88514e-05	0.00271375	2.07723
ANKRD36BP2	-2.20452	-0.907037	-3.96102	0.000719548	0.0237605	-0.793258
LAMC3	-2.20659	-0.435898	-7.75	1.41843e-07	3.15705e-05	7.63855
TCF24	-2.2151	-0.899573	-5.02312	5.76746e-05	0.00370559	1.68666
TMEM171	-2.21738	-1.73195	-4.67301	0.000131942	0.00719283	0.870154
HECW1	-2.2206	-1.80124	-4.35933	0.000278327	0.0120363	0.136127
ABCD2	-2.23243	0.842769	-4.49257	0.000202623	0.00956744	0.447964
ENSG00000233820	-2.25531	-2.50772	-4.57429	0.000166817	0.00849088	0.639231
TMTC1	-2.2608	-1.28679	-3.44093	0.00246582	0.0498428	-1.98727
CACNA1B	-2.26638	0.281901	-5.46812	2.04138e-05	0.00172415	2.71422
PDCD6P1	-2.26738	1.78039	-5.76946	1.02126e-05	0.00103216	3.40054
RPP25	-2.30612	3.93635	-4.66605	0.000134139	0.0072862	0.853889
ZNF280A	-2.30966	-1.09687	-5.15706	4.21158e-05	0.00290292	1.99744
HOXA10	-2.31793	0.971349	-8.32524	4.51386e-08	1.16006e-05	8.76852
ENSG00000271533	-2.32232	-0.0820425	-3.4565	0.0023773	0.048655	-1.95207
SHISA3	-2.3361	-3.67808	-4.30262	0.000318624	0.013238	0.00347063
AP1G2	-2.35094	0.271125	-4.71348	0.000119862	0.0066759	0.964765
STC1	-2.35335	4.40509	-5.34887	2.69186e-05	0.00210551	2.44032
ARHGEF4	-2.35717	0.563608	-5.50129	1.89066e-05	0.00161199	2.79019
ENSG00000272114	-2.38911	-1.28031	-3.83462	0.000972102	0.0282979	-1.08624
PUDP	-2.40761	2.82292	-9.47545	5.20464e-09	1.61434e-06	10.8892
HOXA10-AS	-2.41537	0.141581	-7.00166	6.72227e-07	0.000114088	6.09861
PRUNE2	-2.4183	-1.01557	-4.32431	0.000302565	0.0127009	0.0541935
DOCK4	-2.44908	1.33008	-3.7264	0.00125694	0.0330591	-1.33588
ENSG00000267992	-2.46328	-0.17326	-5.88161	7.91179e-06	0.000860946	3.65364
FIGNL1	-2.4883	2.00806	-5.25131	3.37871e-05	0.00249111	2.2154
ENSG00000272842	-2.51204	-1.35657	-3.76243	0.00115396	0.0314065	-1.2529
TMEM220	-2.5285	-1.27921	-4.44251	0.000228279	0.0102669	0.330789
ENSG00000225963	-2.53079	-1.60301	-3.52706	0.00201368	0.0436459	-1.79199
ENSG00000287271	-2.53216	-0.159945	-6.32685	2.9137e-06	0.000379836	4.6444
ZNF518B	-2.53619	2.356	-5.9267	7.14299e-06	0.000793224	3.755
ENSG00000275516	-2.56232	-1.80309	-3.83188	0.000978442	0.0283449	-1.09256
GABRB3	-2.57936	2.23961	-6.97207	7.15983e-07	0.000119264	6.03612
ADGRB1	-2.60072	1.8154	-5.2389	3.47802e-05	0.00253318	2.18674
ERRFI1	-2.6205	6.26135	-7.02653	6.37575e-07	0.000110288	6.15106
TNFRSF11B	-2.64209	-0.263833	-3.82058	0.00100509	0.0288844	-1.1187
ST8SIA5	-2.6632	-1.22669	-3.84336	0.000952095	0.0279031	-1.06601
NOTCH3	-2.66768	0.883796	-6.19741	3.88596e-06	0.000485475	4.35878
ENSG00000229422	-2.69531	-2.16563	-3.70063	0.00133613	0.0341921	-1.39514
ENSG00000260279	-2.70192	-0.73798	-4.37979	0.000265076	0.011579	0.184008
ENSG00000276855	-2.71994	-2.15255	-5.15113	4.27051e-05	0.00293231	1.9837
ALPK2	-2.72953	0.0959023	-5.70714	1.17762e-05	0.00111502	3.25932
BMERB1	-2.73629	0.461585	-5.52507	1.78966e-05	0.00154788	2.84458
PPL	-2.73808	1.16778	-4.41866	0.000241625	0.0106802	0.274973
ENSG00000261502	-2.74952	-0.925696	-3.70656	0.00131749	0.0339946	-1.38151
CLIP4	-2.78765	-0.040081	-5.29662	3.03993e-05	0.0023173	2.31996
ACOX2	-2.78794	-0.605077	-4.909	7.54684e-05	0.00463371	1.42109
FMN2	-2.86349	-2.58916	-4.95149	6.82709e-05	0.00423515	1.52006
NNT	-2.87401	2.37116	-6.01101	5.90388e-06	0.000685231	3.94395
STS	-2.87549	-0.746504	-8.16212	6.21748e-08	1.53223e-05	8.45286
ZDHHC11	-2.87913	-1.0085	-6.33306	2.87385e-06	0.000377376	4.65806
MAGEA1	-2.88007	0.521564	-4.89243	7.84788e-05	0.00476971	1.38248
FBXO27	-2.88734	2.81411	-8.08318	7.26887e-08	1.76712e-05	8.29873
ENSG00000271119	-2.89832	-3.20517	-3.94285	0.000751366	0.0243551	-0.835444
ENSG00000270277	-2.90171	-1.71863	-5.5927	1.53135e-05	0.00136161	2.99901
LRATD2	-2.90621	0.822113	-5.87027	8.11815e-06	0.000869318	3.6281
RAB38	-2.9319	-2.69971	-5.96961	6.48224e-06	0.000733431	3.85126
PRRX2	-2.93864	-0.856455	-4.33876	0.000292317	0.0124028	0.0879996
NEURL1	-2.93924	-1.78381	-3.88807	0.000856042	0.0262354	-0.962511
GLB1L3	-2.96131	-0.663409	-6.02569	5.7117e-06	0.00066723	3.97677
TUBB4A	-2.97794	-0.530912	-5.85741	8.3588e-06	0.000884558	3.59914
NEFM	-2.98272	-3.15655	-3.71904	0.00127906	0.0334453	-1.3528
VWA1	-3.06079	0.662403	-4.49925	0.000199426	0.00946614	0.463604
MXRA8	-3.09025	0.845964	-6.57963	1.67056e-06	0.000242366	5.19613
ENG	-3.10194	1.1707	-5.07424	5.11451e-05	0.00338272	1.8054
ELAVL2	-3.15084	-2.31495	-3.74196	0.00121139	0.0322822	-1.30006
GABRQ	-3.15139	-1.17266	-5.59126	1.53645e-05	0.00136161	2.99572
KCNJ12	-3.15472	-1.75627	-4.77222	0.000104285	0.00595581	1.102
ZDHHC15	-3.16235	0.504964	-7.84021	1.18185e-07	2.76123e-05	7.81885
CFAP91	-3.16579	-2.21485	-5.99694	6.09418e-06	0.000702784	3.91249
PTN	-3.17541	-0.958357	-7.90772	1.03173e-07	2.44221e-05	7.95302
FRMD3	-3.20353	-2.70236	-3.96929	0.00070552	0.0235043	-0.774058
SOX4	-3.23191	-1.94782	-5.46036	2.07839e-05	0.00173103	2.69642
ENSG00000271011	-3.26092	-1.43013	-8.72004	2.10983e-08	6.12192e-06	9.51704
TJP2	-3.28042	-2.53691	-3.44106	0.00246508	0.0498428	-1.98698
WSCD1	-3.28462	-1.05133	-4.52179	0.000189007	0.00929026	0.516368
FRMD4B	-3.36523	-2.31978	-4.60284	0.00015587	0.00805777	0.706034
CEND1	-3.49307	-1.65271	-4.76147	0.000106975	0.0060518	1.07689
POU3F3	-3.4999	-2.68813	-8.38041	4.05375e-08	1.05691e-05	8.87444
ECHDC3	-3.52255	-1.85283	-5.97598	6.38958e-06	0.000727523	3.86554
IGDCC3	-3.5313	-2.22687	-7.18039	4.60436e-07	8.28324e-05	6.47352
TTN	-3.61139	2.88097	-8.56303	2.84806e-08	7.76312e-06	9.22197
ENSG00000267424	-3.64692	-1.2595	-4.18593	0.000420881	0.0159739	-0.26926
TMEM156	-3.64931	-0.992337	-5.64719	1.35108e-05	0.00123381	3.12313
GALNT14	-3.6985	-2.87165	-6.92136	7.97913e-07	0.000125824	5.92875
TTN-AS1	-3.70857	2.15215	-8.75599	1.97065e-08	5.8118e-06	9.58411
PRDM1	-3.71009	-1.46665	-5.04007	5.54207e-05	0.00359934	1.72605
FBLN2	-3.75884	0.382195	-6.31697	2.97824e-06	0.000385458	4.62267
ARHGAP29	-3.81241	0.820317	-5.42567	2.25225e-05	0.00185014	2.61686
ENSG00000268191	-3.8136	-3.06673	-5.41874	2.28874e-05	0.0018631	2.60095
TRPM6	-3.81474	1.73622	-10.8323	5.00524e-10	2.09405e-07	13.1655
ULBP1	-3.81542	1.11054	-6.78156	1.07754e-06	0.000165683	5.63092
COL13A1	-3.82008	-0.727085	-5.1908	3.89187e-05	0.00271375	2.07552
ENSG00000267257	-3.82645	-1.81952	-4.10103	0.00051536	0.0186922	-0.467382
ENSG00000262884	-3.85349	-1.67872	-4.02141	0.000623109	0.0215572	-0.652857
ENSG00000267886	-3.89901	-2.7454	-5.35337	2.66386e-05	0.0020927	2.45067
ENSG00000287407	-3.92176	-1.79633	-3.95346	0.000732625	0.0239635	-0.81082
ENSG00000225399	-3.9409	-3.91598	-7.68419	1.62152e-07	3.47276e-05	7.50628
MIR4527HG	-4.02309	-3.04934	-5.33299	2.79316e-05	0.0021659	2.40375
MYO10	-4.03487	-2.85489	-5.89299	7.71013e-06	0.000845764	3.67924
RTBDN	-4.077	0.320061	-5.73198	1.11256e-05	0.00107448	3.31565
SORCS2	-4.14417	-3.09903	-5.46169	2.07197e-05	0.00173103	2.69948
KLHL26	-4.17796	-2.9265	-10.0148	1.99992e-09	7.05464e-07	11.8222
NAT16	-4.21798	-2.16759	-4.98365	6.32884e-05	0.00400901	1.5949
RFPL4A	-4.33621	-2.31951	-5.00608	6.00341e-05	0.00384346	1.64705
CHMP1B2P	-4.36583	-1.33875	-7.15883	4.8183e-07	8.50148e-05	6.42854
MIR2052HG	-4.44267	-4.05193	-7.21902	4.24515e-07	7.71416e-05	6.55397
FLRT2	-4.44863	-4.14006	-9.37604	6.23182e-09	1.90018e-06	10.7131
ENSG00000270574	-4.4574	-0.607117	-11.1903	2.79303e-10	1.25616e-07	13.728
TMEM88	-4.50433	-2.05095	-7.5444	2.15875e-07	4.36359e-05	7.2233
LINC00511	-4.56301	-1.68332	-6.21645	3.72435e-06	0.000468538	4.40092
BMP7	-4.62699	-4.22844	-15.4278	6.88984e-13	6.19741e-10	19.3725
TRIM71	-4.65585	-3.41213	-7.06898	5.8263e-07	0.000101762	6.24035
TNFSF9	-4.70658	-2.73231	-9.62899	3.95009e-09	1.29204e-06	11.1587
LPCAT2	-4.85494	-3.8534	-11.5388	1.60307e-10	8.0109e-08	14.2614
ENSG00000284837	-4.97344	-4.24638	-11.0113	3.73216e-10	1.6376e-07	13.4487
LINC01106	-5.00789	-2.32049	-6.93837	7.694e-07	0.000123585	5.96481
CD70	-5.01363	-1.55139	-6.88796	8.57087e-07	0.000132922	5.85784
SPATC1	-5.14773	-4.56368	-21.4648	1.03732e-15	3.11022e-12	25.0426
RPS6KA2	-5.18989	-4.54338	-15.68	5.03892e-13	4.77106e-10	19.6577
FAIM	-5.29312	-1.12147	-8.61909	2.55782e-08	7.07926e-06	9.32771
ENSG00000232111	-5.29724	-4.60181	-43.275	6.33375e-22	1.13944e-17	34.7611
SUMO1P1	-5.32109	-4.20842	-10.0592	1.85142e-09	6.82853e-07	11.8973
ARMCX4	-5.37157	-1.93535	-10.5226	8.38511e-10	3.27931e-07	12.6663
ENPP4	-5.45625	-4.51217	-20.3528	3.00099e-15	6.74847e-12	24.1565
CACNA1A	-5.47869	-2.92135	-7.70383	1.55795e-07	3.3949e-05	7.54582
HPDL	-5.54245	0.206009	-10.0449	1.89787e-09	6.82853e-07	11.8732
FAM230C	-5.56032	-4.25486	-11.9683	8.22701e-11	4.77432e-08	14.8997
C1RL	-5.60333	-2.77188	-7.79128	1.30462e-07	2.99263e-05	7.72121
TNFRSF8	-5.68852	-2.65445	-8.24223	5.31044e-08	1.34556e-05	8.60834
IHO1	-5.72862	-3.27597	-10.8918	4.53871e-10	1.94408e-07	13.26
LINC00664	-5.78983	-0.730509	-19.4015	7.77089e-15	1.39798e-11	23.348
PTPRS	-5.88591	-2.85002	-11.7877	1.08673e-10	5.92432e-08	14.6338
SYCE1	-5.99478	-2.72279	-6.62959	1.49807e-06	0.000221627	5.30421
GFRA1	-6.30552	-3.75546	-11.1922	2.78407e-10	1.25616e-07	13.7311
GAGE1	-6.37242	-2.58034	-7.7012	1.5663e-07	3.3949e-05	7.54054
CYP 20.00	-6.43377	-2.82514	-7.35947	3.16492e-07	6.12226e-05	6.84471
MGMT	-6.60032	-3.19217	-12.1352	6.37863e-11	3.95695e-08	15.1424
RIPK4	-6.69457	-4.36892	-32.1777	2.81917e-19	2.53585e-15	31.1826
OPLAH	-6.91525	-0.424735	-10.5771	7.65154e-10	3.05892e-07	12.755
ADPRH	-6.95338	-4.12682	-26.8344	1.14672e-17	6.87649e-14	28.5807
ZC3HAV1L	-6.97096	-4.22961	-15.3261	7.82511e-13	6.70351e-10	19.2562
SMPD5	-7.01934	-2.84778	-9.63059	3.9388e-09	1.29204e-06	11.1615
LDHAL6FP	-7.71947	-4.07117	-24.7846	5.74204e-17	2.58248e-13	27.3592
RTL6	-7.79634	-3.8326	-20.7024	2.13691e-15	5.49186e-12	24.4417
MAGI2-AS3	-7.84855	-3.39911	-12.0763	6.97546e-11	4.18295e-08	15.0572
NDRG1	-7.89806	-4.05513	-18.6337	1.72784e-14	2.82581e-11	22.6587
ALCAM	-8.41499	-2.16177	-17.0149	1.03015e-13	1.15827e-10	21.0875
NETO1	-8.69798	-3.79149	-17.5489	5.62576e-14	6.74716e-11	21.6245
SFMBT2	-8.75764	-0.38	-18.3149	2.42879e-14	3.64116e-11	22.3623
PIK3CG	-8.84894	-3.49437	-16.9615	1.09543e-13	1.15922e-10	21.0327
IL13RA2	-9.17798	-1.86678	-12.8882	2.09104e-11	1.39325e-08	16.2005
SOX9	-9.98609	-3.07195	-15.9407	3.66271e-13	3.66067e-10	19.9473

## Sheet: A2
	logFC	AveExpr	t	P.Value	adj.P.Val	B
CTPS2	7.67376	1.52964	21.1685	1.36979e-15	3.08031e-12	25.0417
LINC02780	7.31612	-0.702579	14.5161	2.21545e-12	1.59424e-09	18.3829
CRACR2A	6.87787	0.769537	18.2994	2.46966e-14	3.17351e-11	22.5113
NR0B1	6.23602	1.85647	20.5487	2.47929e-15	4.46025e-12	24.5318
ANXA3	6.17293	3.30529	25.7269	2.69729e-17	1.21311e-13	28.2763
NHS	5.42694	-0.904484	6.41334	2.40652e-06	0.000237875	4.79275
TRPM2	5.36647	0.489762	9.58546	4.27013e-09	1.24255e-06	11.0808
PID1	5.22197	-2.49877	9.211	8.4265e-09	2.04855e-06	10.4106
LRRC4C	5.10152	1.6098	8.19147	5.8679e-08	1.0663e-05	8.48908
ENSG00000284703	4.95428	-2.40868	14.8528	1.42927e-12	1.11794e-09	18.7939
ENSG00000280202	4.85244	-1.50453	10.9948	3.83414e-10	1.46758e-07	13.4427
LRMDA	4.78702	-1.95499	11.4452	1.85851e-10	7.77548e-08	14.147
ZNF22	4.74243	2.58695	20.9287	1.71991e-15	3.43791e-12	24.8467
ENSG00000279497	4.72265	-1.61909	5.99121	6.17361e-06	0.000521424	3.8541
GDNF	4.4196	0.934994	9.56469	4.43223e-09	1.26565e-06	11.0442
ASNSP1	4.35284	-0.40376	4.67853	0.000130224	0.00587151	0.826184
KNOP1P5	4.22826	-1.9765	7.12999	5.12068e-07	6.67707e-05	6.33463
GDNF-AS1	4.16218	-0.853665	9.22715	8.18017e-09	2.04391e-06	10.4399
ENSG00000279675	4.14717	-2.12855	5.68863	1.2286e-05	0.000899999	3.16893
PAK3	4.08282	-0.0289162	4.12115	0.000491221	0.0161555	-0.481365
SLITRK3	3.95319	-2.5886	6.71105	1.25504e-06	0.000138517	5.44151
CEP164P1	3.91136	0.88579	5.25475	3.35169e-05	0.00197694	2.17112
EIF4E3	3.82319	-2.59159	6.66462	1.38811e-06	0.000150108	5.34109
RSPO4	3.80765	0.444747	8.6172	2.56709e-08	5.24794e-06	9.30887
MACROH2A2	3.77137	2.2739	6.98485	6.96729e-07	8.70427e-05	6.02789
DYSF	3.67085	0.628664	6.57814	1.67598e-06	0.000173281	5.15329
PTPN20	3.66434	-2.78204	5.52444	1.79227e-05	0.00120301	2.79326
GAP43	3.6592	-0.401966	6.71606	1.2415e-06	0.000138463	5.45232
PARP11	3.64279	0.334824	9.87536	2.55257e-09	8.20015e-07	11.5871
ZNF22-AS1	3.64223	-0.688406	7.62985	1.81174e-07	2.73892e-05	7.36882
LINC01173	3.54279	-1.29615	6.6097	1.56442e-06	0.000163627	5.22193
LDB2	3.51559	0.634979	8.80057	1.81115e-08	3.97349e-06	9.65422
TDRD9	3.50555	3.72777	8.76426	1.93999e-08	4.15115e-06	9.58621
GAS6-DT	3.49926	0.477659	6.93642	7.72608e-07	9.32834e-05	5.92491
SPEF2	3.46886	-1.41315	6.71819	1.23577e-06	0.000138463	5.45693
TNS1	3.46784	-0.982497	5.29174	3.07471e-05	0.00183767	2.25679
CDYL2	3.46407	2.49685	9.50335	4.94916e-09	1.34902e-06	10.9355
ARHGAP22	3.45226	0.0088169	5.51529	1.83052e-05	0.00121129	2.77226
STXBP6	3.40736	-2.40295	4.27118	0.000343433	0.0124063	-0.129905
ENSG00000286913	3.39887	-1.16791	8.12465	6.69538e-08	1.2045e-05	8.35812
ENSG00000233470	3.33816	-2.21841	6.67904	1.34532e-06	0.000147575	5.37229
KRT34	3.33744	-0.219494	6.0914	4.92696e-06	0.000438792	4.07879
GAS6	3.27337	5.09943	9.71248	3.40403e-09	1.05584e-06	11.304
TTC9	3.21954	0.257187	4.72052	0.000117877	0.00543744	0.924667
HSPB8	3.20312	1.16818	5.92018	7.24928e-06	0.0005955	3.69413
CCNA1	3.19813	2.55857	8.75848	1.96135e-08	4.15115e-06	9.57537
ERC2	3.16055	1.24461	15.4562	6.64978e-13	5.69665e-10	19.5075
PTCHD1	3.11595	1.86889	7.58399	1.99016e-07	2.95893e-05	7.27538
BASP1	3.02875	4.15118	11.7342	1.18086e-10	5.44708e-08	14.5866
PCSK5	3.02139	-0.900016	5.41799	2.29274e-05	0.00144724	2.5484
LINC01111	3.01533	-0.587899	3.61883	0.00162157	0.0369734	-1.64676
ENSG00000260328	3.00956	-0.0392393	12.9709	1.85577e-11	1.07694e-08	16.3674
SERPINB7	2.99333	3.55653	6.0678	5.19519e-06	0.000453696	4.02598
GAS6-AS1	2.98778	3.03994	10.932	4.24905e-10	1.59251e-07	13.3426
KRT8P10	2.90181	-1.26047	5.22459	3.59628e-05	0.00208029	2.10118
ADAMTS18	2.87531	-1.22703	3.94058	0.000755456	0.0218148	-0.902816
LINC01094	2.86175	-1.07767	5.51358	1.83775e-05	0.00121129	2.76833
PTPRR	2.85353	1.68967	7.36058	3.1576e-07	4.47285e-05	6.81602
COL4A6	2.85011	-0.270431	6.98702	6.93517e-07	8.70427e-05	6.0325
TP53	2.82915	8.26434	8.45567	3.50306e-08	6.92527e-06	9.00081
SUN3	2.82288	2.81603	9.31564	6.95667e-09	1.76268e-06	10.5997
NMNAT3	2.7955	0.276924	8.54185	2.96644e-08	5.99621e-06	9.16561
B3GALT5	2.75968	-0.638038	4.08823	0.000531332	0.0170386	-0.558325
MGLL	2.73353	6.38337	7.24933	3.98357e-07	5.42912e-05	6.58469
CAMK2N1	2.72216	1.08319	9.21126	8.4225e-09	2.04855e-06	10.411
MSX2	2.69514	-3.08045	4.11351	0.000500243	0.0163697	-0.499213
SERINC2	2.65579	0.724929	4.95453	6.77843e-05	0.00350414	1.4724
APCDD1L-DT	2.64841	-0.775252	3.8977	0.000836642	0.0234185	-1.00255
LINC02057	2.63849	-0.666381	7.82766	1.21216e-07	1.98243e-05	7.76843
ENSG00000236453	2.6251	2.10217	7.79543	1.29372e-07	2.05964e-05	7.7037
FAM189A2	2.6241	0.499936	6.57204	1.69846e-06	0.000174602	5.14
ASPG	2.59428	-2.35523	3.45517	0.00238474	0.0477214	-2.02011
KRT18P17	2.55081	-2.11526	3.91802	0.000797137	0.0226918	-0.955299
DPF3	2.54755	0.945316	6.62628	1.5089e-06	0.000158781	5.25794
NMU	2.52728	1.89327	5.51535	1.83024e-05	0.00121129	2.77241
COL16A1	2.51843	1.95148	5.60345	1.49394e-05	0.00103768	2.97436
C19orf33	2.48695	2.5477	3.65729	0.00148055	0.0348172	-1.55845
WNT7B	2.48674	0.27254	3.5023	0.00213462	0.0441629	-1.91303
ENSG00000275216	2.46868	3.40301	6.85948	9.11111e-07	0.000107835	5.76062
MISP	2.4213	1.63645	4.06639	0.000559749	0.0176355	-0.609385
SH3GL2	2.418	0.159227	7.26499	3.85498e-07	5.29398e-05	6.61736
HIKESHIP1	2.41467	-1.91256	5.18404	3.95386e-05	0.00223009	2.00707
PPP1R1C	2.38649	-0.667482	4.3327	0.00029657	0.0111413	0.0144026
ALS2CL	2.37629	1.72506	5.31238	2.9304e-05	0.00176906	2.30454
SPAG6	2.36167	-1.61854	4.71486	0.000119469	0.00549598	0.911397
FGF1	2.35402	4.24006	6.31149	3.01463e-06	0.000291577	4.56824
ELN-AS1	2.32479	-1.51002	3.59296	0.00172379	0.0383325	-1.70605
LINC00707	2.31564	1.41509	4.61632	0.000150956	0.00662365	0.680221
KRT8P3	2.31211	3.22389	11.5567	1.55855e-10	6.83861e-08	14.3178
RPL41P2	2.30895	-1.00746	3.45752	0.00237163	0.0476178	-2.01478
C16orf86	2.30329	-0.951752	4.2554	0.000356611	0.0127543	-0.16692
NRN1	2.29474	4.69457	12.3808	4.40805e-11	2.26574e-08	15.5376
SAMD9L	2.286	1.25672	3.82627	0.000991589	0.0264569	-1.16835
DSP-AS1	2.28424	0.0982304	3.44417	0.00244715	0.0486455	-2.04505
TMEM255B	2.27833	-1.67606	3.80673	0.00103871	0.0274397	-1.21361
CDX2	2.27085	-2.1117	4.54475	0.000178962	0.00766554	0.512198
RPRM	2.23737	1.45074	5.69585	1.20845e-05	0.00089722	3.18538
CIART	2.2307	2.10458	8.94673	1.37579e-08	3.17313e-06	9.92619
EBF3	2.20913	0.955032	5.78883	9.77126e-06	0.000766743	3.39688
LINC00513	2.2034	5.0189	5.61738	1.44687e-05	0.00102075	3.00621
RPS2P32	2.19752	1.07226	4.03683	0.000600619	0.0185337	-0.678415
CALHM5	2.18134	1.68599	8.49276	3.26078e-08	6.51794e-06	9.07185
PPARG	2.17978	0.414012	3.49582	0.00216739	0.0447662	-1.92776
NLRP3	2.17488	1.5827	4.02851	0.000612648	0.0187441	-0.697834
CYP39A1	2.16853	-0.622066	3.61591	0.0016328	0.037023	-1.65346
GBP1	2.16138	1.50546	5.13261	4.45995e-05	0.00245365	1.88753
ENSG00000267069	2.15091	0.336268	5.07694	5.08211e-05	0.00270494	1.75796
AOX1	2.14735	4.65705	5.60873	1.47591e-05	0.00103314	2.98644
ENSG00000286613	2.14042	1.74661	3.86674	0.000900614	0.0247359	-1.07448
PLPP3	2.13864	0.265564	4.47111	0.000213244	0.00875859	0.339314
ENSG00000266088	2.12601	-0.373763	3.45277	0.0023982	0.0478152	-2.02554
CREB3L1	2.11592	4.035	5.98161	6.3088e-06	0.000527885	3.83253
LINP1	2.11183	-1.0722	5.23863	3.48022e-05	0.00203276	2.13375
MVB12B	2.11156	0.801325	3.48731	0.00221124	0.0454631	-1.94713
TMEM40	2.10707	1.53567	6.06965	5.17364e-06	0.000453696	4.03012
THRB	2.10196	-0.2313	3.84445	0.00094964	0.025729	-1.1262
TM4SF19	2.09179	-1.35367	4.67144	0.000132434	0.0059266	0.809551
KRT8	2.09136	10.6398	6.05995	5.28773e-06	0.000459548	4.00839
BDH1	2.03553	-0.514656	4.73462	0.000114002	0.00528581	0.957719
ATP2C2	2.0332	0.111587	9.549	4.55888e-09	1.28147e-06	11.0164
TSHZ3	2.01451	1.32946	4.86415	8.39002e-05	0.00412395	1.26111
LINC01896	2.00251	5.63949	3.55472	0.00188658	0.0409899	-1.79349
KIF26A	1.99589	2.00758	7.55293	2.12123e-07	3.12795e-05	7.21193
GHDC	1.99389	2.42938	4.91636	7.41683e-05	0.00369888	1.38323
ENSG00000240399	1.97858	-0.773689	3.75379	0.00117787	0.029887	-1.33608
PTCHD4	1.96845	-1.40512	5.17724	4.01732e-05	0.00224446	1.99126
SCIRT	1.95421	-0.99868	4.07481	0.000548612	0.0173759	-0.589693
TMEM45B	1.95056	-0.743688	5.32665	2.83466e-05	0.00174046	2.33755
ENSG00000231424	1.92358	-2.25462	3.74136	0.00121312	0.0304805	-1.36478
KCNK13	1.90835	0.379515	5.42862	2.23692e-05	0.00141698	2.5729
TCP11	1.90342	2.05547	6.04204	5.50525e-06	0.000476151	3.96823
MAD1L1	1.90224	2.52675	3.48365	0.00223033	0.0458032	-1.95543
RASGRP1	1.89733	0.915641	3.91734	0.00079844	0.0226918	-0.956894
ACADL	1.88457	-0.285126	6.71407	1.24686e-06	0.000138463	5.44803
YBX2	1.87762	4.53622	4.2792	0.000336926	0.0122204	-0.111095
GPRC5A	1.85426	6.94801	6.29444	3.13091e-06	0.000298017	4.53053
LANCL3	1.85093	-0.637419	4.14409	0.000465064	0.0155997	-0.427687
FOXG1-AS1	1.84857	-0.485623	4.4816	0.000207987	0.00862138	0.363929
SPECC1	1.84298	5.26784	12.4454	4.00363e-11	2.11839e-08	15.6301
SUSD4	1.83967	-0.237401	4.48554	0.00020604	0.00856043	0.373201
CPS1	1.83263	1.56821	4.61414	0.000151742	0.00664193	0.675093
NELL2	1.82635	2.40824	6.10783	4.74858e-06	0.000427135	4.11552
ZNF503	1.7695	2.58673	8.39082	3.97253e-08	7.60276e-06	8.87611
ATP2C2-AS1	1.76111	-0.322927	6.66286	1.39344e-06	0.000150108	5.33727
ENSG00000279133	1.75813	-0.462874	3.9664	0.000710387	0.0207129	-0.842678
KCNK6	1.75454	3.1454	4.14748	0.000461311	0.0155121	-0.419736
SLC25A27	1.75282	2.09441	4.73763	0.000113191	0.00526179	0.964776
GOLGA2P5	1.7483	0.17633	7.23821	4.07753e-07	5.5154e-05	6.56147
ISM1	1.7353	-0.0616561	4.22032	0.000387736	0.0135444	-0.249148
SLC27A6	1.71585	1.94964	3.8908	0.000850498	0.0236849	-1.01859
KRT8P33	1.70681	-0.705733	3.98228	0.000684016	0.0201399	-0.805677
PRICKLE1	1.69266	1.0201	4.95169	6.82395e-05	0.00350607	1.46577
SAMD3	1.6866	1.14973	3.68648	0.00138169	0.0332752	-1.49131
KRT8P45	1.67556	-0.980798	4.31941	0.000306123	0.0114494	-0.0167921
SCUBE3	1.67352	-0.768376	3.98422	0.000680848	0.0201238	-0.801136
BSPRY	1.67245	-0.2774	3.61004	0.0016556	0.0373019	-1.66691
SYNE3	1.6682	2.92126	3.70859	0.00131116	0.0320487	-1.44038
DMTN	1.66423	0.758665	4.35163	0.000283481	0.0108047	0.0588289
ENSG00000287016	1.65965	0.615921	5.29985	3.01716e-05	0.00180929	2.27556
REPS2	1.63577	2.25277	5.48836	1.94802e-05	0.00127436	2.71039
ELFN1	1.6248	3.34901	5.34395	2.72283e-05	0.0016891	2.37754
GUCY1A2	1.62004	0.569489	3.54757	0.00191866	0.0412901	-1.80982
EN2	1.61278	0.40698	6.80313	1.02856e-06	0.000119379	5.63982
FRMPD3	1.59842	-0.532753	3.82383	0.000997347	0.0265418	-1.174
MYOSLID	1.59459	-0.895827	3.46383	0.00233671	0.04718	-2.00045
ROBO2	1.5856	-0.983034	3.60365	0.00168081	0.0375624	-1.68157
DAW1	1.55871	-0.447161	4.84641	8.74933e-05	0.00426559	1.21959
SLC30A3	1.54656	0.39062	4.0869	0.000533024	0.0170533	-0.561443
LINC02575	1.5445	2.01167	7.64219	1.76661e-07	2.69333e-05	7.39391
ENSG00000276170	1.54027	3.09009	3.59121	0.00173091	0.0384432	-1.71004
PLCG2	1.53873	2.05379	5.6775	1.26034e-05	0.000914253	3.14354
TRHDE-AS1	1.53268	2.41382	4.93336	7.1252e-05	0.00360063	1.42297
CENPN-AS1	1.5291	2.8655	5.76011	1.04329e-05	0.000795286	3.33166
ERBB3	-1.50667	1.73944	-4.30167	0.000319351	0.0118456	-0.0584091
C1orf167	-1.51131	0.737358	-4.12013	0.000492416	0.0161653	-0.483748
LTBP2	-1.52262	4.24085	-4.20342	0.000403687	0.0138953	-0.28875
CYP4F26P	-1.52912	0.457974	-3.98545	0.000678869	0.0201238	-0.798288
CARD8	-1.53029	4.9071	-5.68905	1.22741e-05	0.000899999	3.16989
CPLX1	-1.53332	1.37033	-3.73262	0.00123854	0.030818	-1.38496
CEL	-1.54818	-0.901096	-3.53406	0.00198074	0.0421414	-1.84065
TGM1	-1.54928	-0.578798	-4.07737	0.000545278	0.0173314	-0.583718
TBC1D16	-1.55083	3.59597	-6.9384	7.69354e-07	9.32834e-05	5.92911
GPR157	-1.55942	1.21171	-7.10804	5.36381e-07	6.8925e-05	6.28842
EMC10	-1.56715	3.89124	-3.93446	0.000766543	0.0219938	-0.917057
CTHRC1	-1.56847	2.0374	-4.9404	7.00792e-05	0.00357146	1.43941
CDK20	-1.56929	0.828835	-4.05161	0.000579819	0.0180779	-0.643897
TMC4	-1.60009	-1.58408	-3.45525	0.00238427	0.0477214	-2.01992
SAXO2	-1.60537	-1.23238	-3.66062	0.00146894	0.0346395	-1.55081
ABCA17P	-1.60853	-1.10664	-3.72722	0.0012545	0.0310861	-1.39742
CELSR1	-1.60862	3.45586	-5.63787	1.38031e-05	0.000985389	3.05306
ZFHX2	-1.60945	1.05551	-4.14994	0.000458613	0.0154503	-0.413981
GARIN5A	-1.60999	-0.427739	-4.17534	0.000431657	0.0146243	-0.354528
ARID3B	-1.61037	3.27813	-5.86958	8.13087e-06	0.000653011	3.57985
HOXA10	-1.61045	0.971349	-5.7842	9.87481e-06	0.000769039	3.38638
EID3	-1.61111	-0.180344	-5.43935	2.18199e-05	0.00139198	2.59762
NNT-AS1	-1.61236	1.52483	-5.47104	2.02766e-05	0.00131214	2.67055
MYPN	-1.61354	4.30013	-4.4273	0.000236699	0.00944173	0.236457
THBS3-AS1	-1.6147	2.27311	-4.31376	0.000310269	0.0115325	-0.030027
RP1	-1.61775	0.813792	-4.09839	0.000518623	0.0166906	-0.534593
SMAD6	-1.6183	0.317225	-4.03245	0.000606927	0.0186324	-0.688647
PCDHB14	-1.61879	0.0644966	-4.19952	0.000407456	0.0139356	-0.297875
AMOT	-1.62358	2.08604	-4.77308	0.000104073	0.00488842	1.04786
HLA-DMA	-1.64816	-0.674652	-3.49531	0.00216999	0.0447686	-1.92892
C2CD4C	-1.65207	-0.393714	-3.54755	0.00191876	0.0412901	-1.80987
CAMK1D	-1.65224	2.29571	-6.00729	5.95362e-06	0.000505215	3.89024
ZNF582-DT	-1.65843	1.42377	-5.25121	3.37952e-05	0.00198672	2.16291
THBS3	-1.66581	3.43822	-4.39816	0.000253724	0.0099228	0.16803
FGF5	-1.6786	4.57517	-5.13794	4.40451e-05	0.00244559	1.89994
PXDN	-1.68087	4.19918	-4.22647	0.000382091	0.0133993	-0.234741
ENSG00000234405	-1.69301	-0.777741	-4.20568	0.000401518	0.013891	-0.283458
ENSG00000232450	-1.69752	-1.6074	-4.43912	0.000230126	0.00927711	0.264209
ENSG00000264272	-1.70669	-0.642528	-3.82255	0.00100039	0.0265834	-1.17697
SYP	-1.70751	0.878273	-5.30267	2.99743e-05	0.00180347	2.28208
ITGAM	-1.70908	1.9806	-8.09318	7.1261e-08	1.2442e-05	8.29622
BST1	-1.72664	0.0185949	-6.22067	3.6894e-06	0.000344246	4.36698
PIM2	-1.72691	3.55918	-6.96218	7.31254e-07	9.01045e-05	5.97971
NPTX1	-1.72824	-1.00052	-4.72736	0.00011598	0.00536372	0.940703
ADM	-1.73382	5.26431	-3.76873	0.00113683	0.0291749	-1.30155
ENSG00000233820	-1.7358	-2.50772	-3.5206	0.00204459	0.0431408	-1.87135
THEMIS2	-1.73638	-0.34979	-4.23101	0.000377975	0.013347	-0.2241
FAM78A	-1.7408	0.48878	-6.96381	7.28713e-07	9.01045e-05	5.98318
MLLT11	-1.74238	3.19208	-8.7201	2.10957e-08	4.41292e-06	9.50325
KIAA0319	-1.74254	1.5348	-5.51349	1.83814e-05	0.00121129	2.76812
GRK5	-1.74797	1.94652	-8.0711	7.44519e-08	1.27561e-05	8.25272
MAPT	-1.74814	0.347489	-3.78665	0.00108947	0.0282008	-1.2601
ENSG00000259347	-1.74957	0.254055	-5.9448	6.85619e-06	0.000571032	3.74965
LINC01301	-1.764	-1.95325	-3.99764	0.000659425	0.0197718	-0.769854
KCNAB2	-1.76409	-0.102553	-4.28911	0.000329057	0.012055	-0.0878573
SPIRE2	-1.76603	2.93528	-5.35274	2.66773e-05	0.00167221	2.39785
MIR9-3HG	-1.76956	1.23987	-5.7738	1.01119e-05	0.000784106	3.36277
PCDHB11	-1.77332	-0.123748	-4.40562	0.000249252	0.00981191	0.185545
GATM	-1.79056	-0.688791	-3.6223	0.0016083	0.0368577	-1.63879
PAQR9	-1.79426	-0.317204	-4.48658	0.000205533	0.00855912	0.375631
ENSG00000260948	-1.80473	-1.62869	-4.07541	0.000547838	0.0173759	-0.588309
ZIC1	-1.80626	0.942195	-4.6663	0.000134059	0.00598443	0.797499
IL1R1	-1.81776	1.20242	-3.90217	0.000827785	0.0233049	-0.992152
PGAM2	-1.82153	-0.847994	-3.47048	0.00230047	0.0467631	-1.98535
CLIP3	-1.82564	4.20944	-3.90422	0.00082377	0.0232283	-0.987403
CHD5	-1.82927	-0.35931	-4.24947	0.000361693	0.0129104	-0.180827
TTYH2	-1.83762	1.77969	-8.01858	8.26519e-08	1.38963e-05	8.14894
LHX6	-1.83915	-1.22506	-5.45723	2.09349e-05	0.00134989	2.63878
SLC45A4	-1.88435	3.50666	-9.96118	2.19613e-09	7.31638e-07	11.7349
GREB1	-1.89435	0.40474	-4.70254	0.000123012	0.00561674	0.882501
LSMEM1	-1.89656	-1.21174	-5.17725	4.01723e-05	0.00224446	1.99128
APLP1	-1.90436	4.24547	-5.31382	2.92059e-05	0.00176906	2.30788
SBK1	-1.90744	-0.340785	-4.52777	0.000186337	0.00792484	0.472348
ABCB6	-1.91722	-1.33635	-4.92767	7.22149e-05	0.0036289	1.40967
F11-AS1	-1.92223	-1.17655	-4.89884	7.72993e-05	0.0038274	1.34227
NYNRIN	-1.92712	-0.226678	-3.5179	0.00205762	0.043345	-1.8775
ZDHHC15	-1.93101	0.504964	-4.78743	0.000100594	0.00476233	1.08149
LGI2	-1.93271	-0.222096	-3.97921	0.000689035	0.0202545	-0.812829
LINC01341	-1.93563	-1.45467	-4.05668	0.000572851	0.0179228	-0.632053
SPP1	-1.93599	2.62289	-4.18865	0.000418166	0.0142208	-0.323353
NPIPB11	-1.93807	0.300837	-4.57679	0.000165829	0.00718858	0.587428
ENSG00000225032	-1.94033	0.0677955	-3.63524	0.00155985	0.0359766	-1.60911
EFNB3	-1.95185	0.879807	-4.40593	0.000249066	0.00981191	0.186282
EVC2	-1.96471	3.18396	-13.0382	1.68469e-11	1.04509e-08	16.4598
ENSG00000269896	-1.97077	-0.518593	-3.61281	0.0016448	0.0371733	-1.66056
ENSG00000261786	-1.97599	-0.839787	-4.11182	0.000502275	0.0163697	-0.503189
S1PR5	-1.98174	0.961672	-4.23206	0.000377024	0.013347	-0.221622
STS	-1.98673	-0.746504	-5.63935	1.37564e-05	0.000985389	3.05644
GPR153	-1.9876	-0.0639346	-5.20113	3.79891e-05	0.00215591	2.04675
ENSG00000267372	-1.9936	1.67173	-6.22022	3.69314e-06	0.000344246	4.36597
PNPLA3	-1.99875	-0.642719	-5.33381	2.78778e-05	0.00171754	2.35411
LIMCH1	-2.00451	1.9367	-4.95833	6.71787e-05	0.00348284	1.4813
FHL1	-2.01866	4.27229	-4.65683	0.00013711	0.00610548	0.775261
TMEM37	-2.02348	-1.04692	-3.64343	0.00152993	0.0356208	-1.59031
FMN2	-2.02685	-2.58916	-3.50479	0.00212213	0.0440508	-1.90736
PRRT2	-2.02852	-0.622718	-3.50466	0.00212276	0.0440508	-1.90765
CCDC92B	-2.0293	-1.4006	-5.4825	1.97461e-05	0.00128707	2.69691
MAFA	-2.03105	-1.21871	-4.47855	0.000209499	0.00864424	0.356785
PUDP	-2.03198	2.82292	-7.99709	8.62714e-08	1.42387e-05	8.10637
SPARC	-2.03986	1.10787	-3.59345	0.0017218	0.0383325	-1.70493
ENSG00000287271	-2.04587	-0.159945	-5.11181	4.68279e-05	0.00253745	1.83915
ABCD1	-2.05741	1.87765	-4.89806	7.74415e-05	0.0038274	1.34045
PLEKHA4	-2.0593	-1.42812	-3.92613	0.0007819	0.0223631	-0.936441
TMEM38A	-2.06341	0.411479	-5.8752	8.02784e-06	0.000647627	3.59255
RHPN1-AS1	-2.06484	1.02551	-8.08916	7.18307e-08	1.2442e-05	8.28831
SLC6A16	-2.07096	-1.66592	-4.28646	0.000331142	0.012055	-0.094067
SLIT3	-2.0736	-0.0102404	-4.31507	0.000309304	0.0115205	-0.026963
ARHGAP44	-2.08108	-0.569327	-5.70288	1.18914e-05	0.000887663	3.20141
LINC01515	-2.08616	-1.74982	-3.95705	0.000726389	0.0210431	-0.86446
NNT	-2.11203	2.37116	-4.41732	0.000242397	0.00962631	0.21302
FCGBP	-2.11761	3.99298	-7.73336	1.46718e-07	2.31531e-05	7.57861
SYT12	-2.15877	-1.84764	-3.47207	0.00229192	0.0466709	-1.98176
PPP1R3F	-2.17423	-1.03856	-5.33768	2.76285e-05	0.00170803	2.36304
GALNT6	-2.17833	2.33109	-6.33896	2.83656e-06	0.000277335	4.62891
TNFRSF9	-2.18438	0.281112	-5.58289	1.56633e-05	0.00107963	2.92729
RADIL	-2.19046	1.12781	-6.64645	1.44407e-06	0.000153721	5.3017
LIF	-2.2013	2.49201	-7.36992	3.09682e-07	4.42157e-05	6.83537
HSPA2	-2.2085	2.22497	-7.59983	1.92656e-07	2.88824e-05	7.30769
ABCD2	-2.21052	0.842769	-4.44848	0.000225053	0.00913927	0.286182
BRSK2	-2.21106	-0.386819	-5.74459	1.08095e-05	0.000820521	3.29635
NAALAD2	-2.21108	-0.836221	-4.0203	0.000624764	0.01905	-0.717007
CEACAM19	-2.2237	0.591888	-6.10957	4.73008e-06	0.000427135	4.11941
PARVB	-2.23001	1.84394	-4.43843	0.00023051	0.00927711	0.262569
PNMA8A	-2.24271	4.40406	-7.22129	4.22494e-07	5.58873e-05	6.52611
CERS4	-2.24448	-0.413767	-4.1003	0.000516258	0.0166649	-0.530113
RASGEF1A	-2.24667	1.18439	-6.89873	8.37528e-07	0.000100448	5.84452
PADI2	-2.25861	-2.33749	-3.64417	0.00152724	0.0356208	-1.5886
NMNAT2	-2.28365	-1.02541	-4.68709	0.000127607	0.00578248	0.846253
DNAH10	-2.28718	-1.86078	-3.74018	0.00121651	0.030523	-1.36749
ERRFI1	-2.30235	6.26135	-6.17345	4.09965e-06	0.000374379	4.26192
LRP1	-2.30351	2.57067	-4.04539	0.000588491	0.0182526	-0.658439
MAP1A	-2.31401	1.38076	-7.27962	3.73873e-07	5.17382e-05	6.64785
YPEL3	-2.32121	-1.379	-5.71982	1.14392e-05	0.000864671	3.24
ARHGDIB	-2.32273	1.22721	-3.47551	0.00227343	0.0464762	-1.97393
SESN3	-2.32969	-0.0722506	-4.14121	0.000468263	0.015629	-0.434411
ENSG00000267992	-2.33326	-0.17326	-5.57116	1.6092e-05	0.0011012	2.90042
USP27X-DT	-2.33385	-0.731199	-4.04468	0.000589482	0.0182526	-0.660085
GAL3ST4	-2.37198	-1.0756	-6.71699	1.239e-06	0.000138463	5.45433
RIMKLA	-2.37462	-0.491464	-4.73869	0.000112908	0.00526179	0.967253
SSC5D	-2.37928	-1.92134	-3.58963	0.0017374	0.0385399	-1.71367
PREX1	-2.38238	0.764118	-4.14128	0.000468188	0.015629	-0.434254
LINC01232	-2.39504	-1.36166	-5.68043	1.25191e-05	0.000911819	3.15022
SSTR2	-2.39619	-0.343323	-6.20281	3.83943e-06	0.000355403	4.32726
MT-TM	-2.40838	0.820935	-4.81386	9.44942e-05	0.00452115	1.1434
PPFIBP2	-2.45517	0.409485	-4.83371	9.01602e-05	0.00435592	1.18987
FBXL21P	-2.45799	0.918039	-4.03593	0.000601914	0.0185418	-0.680525
ARHGEF4	-2.46816	0.563608	-5.76032	1.04278e-05	0.000795286	3.33214
KCNF1	-2.4765	-2.28831	-4.3856	0.000261429	0.0101579	0.138563
EMP2	-2.49156	1.74733	-5.82853	8.92634e-06	0.000713133	3.48691
BMERB1	-2.50419	0.461585	-5.05642	5.33314e-05	0.00282697	1.71014
FBXO27	-2.52616	2.81411	-7.07203	5.78877e-07	7.38581e-05	6.21248
COL13A1	-2.53587	-0.727085	-3.44579	0.00243784	0.0485142	-2.04137
CFAP91	-2.54406	-2.21485	-4.8192	9.33086e-05	0.00447632	1.15589
OCIAD2	-2.55449	-0.853936	-3.5557	0.00188224	0.0409571	-1.79126
C1orf162	-2.56109	-2.11	-3.96082	0.000719899	0.0209224	-0.855684
ATF7IP2	-2.56639	0.436002	-6.78123	1.0783e-06	0.00012435	5.59276
GABRB3	-2.57037	2.23961	-6.94776	7.54114e-07	9.22891e-05	5.94905
PDZD4	-2.60134	-1.59	-4.57968	0.000164694	0.00715663	0.594209
NLRP11	-2.60196	-1.88866	-5.9364	6.98779e-06	0.000576653	3.73072
CACNA1B	-2.61112	0.281901	-6.29988	3.09334e-06	0.000297589	4.54256
HSF2BP	-2.6309	-0.969692	-6.26607	3.33468e-06	0.000314088	4.4677
MXRA8	-2.632	0.845964	-5.60393	1.4923e-05	0.00103768	2.97545
PPP2R2C	-2.64029	0.783128	-9.04708	1.14092e-08	2.70067e-06	10.1112
APOBEC3D	-2.64995	-1.46733	-7.29005	3.65811e-07	5.1015e-05	6.66955
SYT5	-2.6745	-1.42322	-4.6739	0.000131663	0.00590678	0.815322
ENSG00000256013	-2.67861	-1.42151	-6.17727	4.06475e-06	0.000373086	4.27044
ENSG00000274904	-2.68763	0.112561	-7.39959	2.9117e-07	4.19052e-05	6.89673
MAMSTR	-2.71347	0.230874	-4.88509	7.98513e-05	0.00393569	1.3101
NKD2	-2.74206	0.466187	-4.10251	0.000513543	0.0166163	-0.524942
SCARF1	-2.77576	0.860716	-12.3123	4.88408e-11	2.44068e-08	15.4389
NLGN3	-2.78192	-0.709356	-8.32141	4.54774e-08	8.43442e-06	8.74198
CHMP1B2P	-2.80774	-1.33875	-4.60396	0.000155456	0.00678801	0.651207
PANX2	-2.82526	0.235839	-6.65401	1.42053e-06	0.000152115	5.31808
DOCK8	-2.848	-2.99431	-3.79886	0.00105833	0.0275656	-1.23185
NOTCH3	-2.85224	0.883796	-6.62617	1.50926e-06	0.000158781	5.2577
ROR2	-2.88306	0.150473	-5.68789	1.23068e-05	0.000899999	3.16724
AFF3	-2.89155	-2.37142	-3.89009	0.000851945	0.0236885	-1.02025
ENSG00000267886	-2.90774	-2.7454	-3.99234	0.000667804	0.0199234	-0.78221
FBXL7	-2.91579	-1.03639	-5.09553	4.86513e-05	0.00262047	1.80125
OPLAH	-2.9203	-0.424735	-4.46669	0.0002155	0.00883107	0.328941
MGAT3	-2.95221	-2.80211	-3.61788	0.0016252	0.0370094	-1.64894
TRIM6	-2.96243	0.64903	-8.10708	6.93237e-08	1.23479e-05	8.32358
MAGEA1	-2.97111	0.521564	-5.04709	5.45136e-05	0.00287595	1.6884
AP1G2-AS1	-2.98177	-0.677155	-4.94178	6.98524e-05	0.00357002	1.44262
COMP	-2.98658	-2.15878	-4.93474	7.10217e-05	0.0035991	1.42617
ANKEF1	-3.05821	-1.19251	-7.46051	2.56643e-07	3.72339e-05	7.02235
VGF	-3.06255	5.69548	-4.65442	0.000137897	0.00612534	0.769609
ENG	-3.10373	1.1707	-5.07715	5.07962e-05	0.00270494	1.75845
ZIC4	-3.10414	-3.10737	-3.80133	0.00105213	0.0275656	-1.22612
OLFM2	-3.16709	-1.7363	-7.29042	3.65521e-07	5.1015e-05	6.67034
LAMC3	-3.19552	-0.435898	-11.2234	2.64811e-10	1.08272e-07	13.803
FCHO1	-3.22272	-0.467106	-6.2013	3.85234e-06	0.000355403	4.32392
ENSG00000267424	-3.24989	-1.2595	-3.73022	0.0012456	0.0309507	-1.39049
SLC9A2	-3.2542	-0.308261	-4.26161	0.00035137	0.0125919	-0.152365
ERG	-3.25482	-2.97835	-4.39821	0.000253689	0.0099228	0.168166
NKX2-5	-3.26782	-1.4991	-4.99176	6.20911e-05	0.00322838	1.55935
ADGRB1	-3.27289	1.8154	-6.59292	1.62276e-06	0.000168749	5.18544
UNC13A	-3.28422	-2.08555	-3.51064	0.0020931	0.0438181	-1.89404
RFPL4A	-3.28598	-2.31951	-3.7936	0.00107163	0.0278403	-1.24401
SLC39A4	-3.29901	2.27802	-6.09837	4.85046e-06	0.000434129	4.09438
ICAM1	-3.32178	2.3314	-14.3227	2.86092e-12	1.97398e-09	18.1423
ICAM4-AS1	-3.33207	0.896729	-7.82002	1.231e-07	1.99511e-05	7.7531
SUMO1P1	-3.36983	-4.20842	-6.37047	2.64547e-06	0.000260066	4.69841
TRIM71	-3.41433	-3.41213	-5.18398	3.95441e-05	0.00223009	2.00693
AP1G2	-3.41552	0.271125	-6.8479	9.34065e-07	0.000109829	5.73583
TUB	-3.48377	-3.69412	-7.22766	4.16879e-07	5.5553e-05	6.53943
PMEPA1	-3.49129	-1.56409	-5.61519	1.45417e-05	0.00102189	3.0012
POU3F3	-3.4999	-2.68813	-8.38041	4.05375e-08	7.67652e-06	8.85604
ECHDC3	-3.50276	-1.85283	-5.94242	6.89324e-06	0.000571472	3.74429
ENSG00000258902	-3.53518	-1.69303	-5.56181	1.64425e-05	0.00112046	2.87899
TUBB4A	-3.62281	-0.530912	-7.12583	5.16584e-07	6.68586e-05	6.32588
FAIM	-3.70071	-1.12147	-6.02608	5.70668e-06	0.000487716	3.93244
ZNF280A	-3.74838	-1.09687	-8.3695	4.14077e-08	7.75963e-06	8.83497
PDCD6P1	-3.76643	1.78039	-9.58387	4.28227e-09	1.24255e-06	11.0781
ENSG00000271119	-3.76692	-3.20517	-5.12449	4.54557e-05	0.00247802	1.86866
DOCK2	-3.78745	-2.32962	-3.84642	0.000945204	0.025702	-1.12163
ENSG00000267257	-3.81278	-1.81952	-4.08638	0.000533685	0.0170533	-0.562656
EYA1	-3.8645	-2.76517	-5.26281	3.28928e-05	0.00194652	2.18979
MGAT4A	-3.88529	0.0617284	-4.92781	7.2191e-05	0.0036289	1.41
VWA1	-3.93711	0.662403	-5.78742	9.80272e-06	0.000766743	3.39368
ALPK2	-3.938	0.0959023	-8.23391	5.39786e-08	9.90892e-06	8.57195
LRRK1	-3.96916	-1.22003	-6.07363	5.12762e-06	0.000452185	4.03902
ENSG00000284837	-4.03512	-4.24638	-8.93389	1.40926e-08	3.2092e-06	9.90242
RTBDN	-4.05041	0.320061	-5.6946	1.21192e-05	0.00089722	3.18253
SHISA3	-4.1732	-3.67808	-7.6862	1.61489e-07	2.50447e-05	7.48322
KLHL26	-4.17796	-2.9265	-10.0148	1.99992e-09	6.78842e-07	11.8268
PRDM1	-4.28932	-1.46665	-5.82693	8.95875e-06	0.000713133	3.48331
CLEC11A	-4.31096	-1.94488	-4.93501	7.09756e-05	0.0035991	1.42682
PLEKHG1	-4.31939	-2.18677	-5.80028	9.51951e-06	0.000754431	3.42286
TNFSF9	-4.33394	-2.73231	-8.86662	1.59899e-08	3.55134e-06	9.7775
ZDHHC11	-4.33679	-1.0085	-9.5394	4.6382e-09	1.28371e-06	10.9994
NES	-4.55368	-0.03671	-10.3777	1.07143e-09	3.85499e-07	12.4389
OCA2	-4.60023	-1.30902	-7.7283	1.48232e-07	2.31886e-05	7.5684
NEBL	-4.62278	-2.72224	-7.2322	4.12929e-07	5.54373e-05	6.54891
HECW1	-4.68266	-1.80124	-9.19267	8.71549e-09	2.09055e-06	10.3773
MIR2052HG	-4.70917	-4.05193	-7.65206	1.73137e-07	2.66216e-05	7.41395
CEND1	-4.71183	-1.65271	-6.42278	2.35693e-06	0.000235562	4.8135
RPS6KA2	-4.73195	-4.54338	-14.2964	2.96261e-12	1.97398e-09	18.1094
TMEM88	-4.77727	-2.05095	-8.00156	8.5506e-08	1.42387e-05	8.11522
ENSG00000225399	-4.81414	-3.91598	-9.38688	6.1102e-09	1.59308e-06	10.7277
ENSG00000287407	-4.82043	-1.79633	-4.8594	8.4848e-05	0.00415917	1.24999
LPCAT2	-4.85494	-3.8534	-11.5388	1.60307e-10	6.86648e-08	14.2904
RAB38	-4.86561	-2.69971	-9.90679	2.41553e-09	7.90098e-07	11.6414
FLRT2	-4.87649	-4.14006	-10.2778	1.27031e-09	4.44891e-07	12.2721
ADAMTS1	-4.88342	-0.123769	-7.79873	1.28511e-07	2.05964e-05	7.71034
NAP1L2	-4.94773	-2.08089	-6.31928	2.96297e-06	0.000288129	4.58547
IHO1	-4.96547	-3.27597	-9.44081	5.54099e-09	1.46592e-06	10.8241
ENSG00000268191	-5.01786	-3.06673	-7.12987	5.12193e-07	6.67707e-05	6.33438
SPATC1	-5.14773	-4.56368	-21.4648	1.03732e-15	2.6659e-12	25.2788
SORCS2	-5.18269	-3.09903	-6.83038	9.69926e-07	0.000113305	5.6983
FAM230C	-5.18768	-4.25486	-11.1662	2.90355e-10	1.13554e-07	13.7134
ENSG00000232111	-5.29724	-4.60181	-43.275	6.33375e-22	1.13944e-17	35.4854
ENPP4	-5.45625	-4.51217	-20.3528	3.00099e-15	4.83178e-12	24.3667
NAT16	-5.72672	-2.16759	-6.76627	1.11371e-06	0.000127615	5.56056
TBX3	-6.03367	-1.26363	-10.2706	1.28596e-09	4.44891e-07	12.2601
C1RL	-6.0552	-2.77188	-8.41959	3.75672e-08	7.34603e-06	8.9315
TNFRSF8	-6.06648	-2.65445	-8.78986	1.84819e-08	4.00589e-06	9.63419
BMP7	-6.08222	-4.22844	-20.28	3.22298e-15	4.83178e-12	24.3048
CACNA1A	-6.17385	-2.92135	-8.68132	2.27118e-08	4.69639e-06	9.43016
NPAS2	-6.24053	-2.52515	-12.6042	3.1649e-11	1.72535e-08	15.8559
PTPRS	-6.41052	-2.85002	-12.8383	2.24784e-11	1.26371e-08	16.184
MGMT	-6.59424	-3.19217	-12.124	6.48764e-11	3.15439e-08	15.1653
MYO10	-6.60274	-2.85489	-9.6434	3.84971e-09	1.17384e-06	11.1829
GFRA1	-6.68312	-3.75546	-11.8625	9.68007e-11	4.58275e-08	14.7789
RIPK4	-6.69457	-4.36892	-32.1777	2.81917e-19	2.53585e-15	31.6728
TMEM156	-6.76056	-0.992337	-10.4617	9.29142e-10	3.41128e-07	12.5783
CD70	-6.79036	-1.55139	-9.32892	6.79012e-09	1.74506e-06	10.6236
SOX4	-6.91828	-1.94782	-11.6885	1.26783e-10	5.70207e-08	14.5178
LINC00511	-6.93073	-1.68332	-9.44211	5.52793e-09	1.46592e-06	10.8265
ADPRH	-6.95338	-4.12682	-26.8344	1.14672e-17	6.87649e-14	28.945
ZC3HAV1L	-6.97096	-4.22961	-15.3261	7.82511e-13	6.39881e-10	19.3562
PTN	-6.98388	-0.958357	-17.392	6.70919e-14	7.09991e-11	21.6122
SMPD5	-6.98926	-2.84778	-9.58932	4.24071e-09	1.24255e-06	11.0877
MAGI2-AS3	-7.26795	-3.39911	-11.183	2.826e-10	1.12977e-07	13.7398
SYCE1	-7.31399	-2.72279	-8.08849	7.19269e-08	1.2442e-05	8.28698
LDHAL6FP	-7.34311	-4.07117	-23.5762	1.57529e-16	5.6679e-13	26.8546
CYP 20.00	-7.3549	-2.82514	-8.41314	3.80402e-08	7.35852e-06	8.91909
MIR4527HG	-7.37326	-3.04934	-9.77395	3.05245e-09	9.63396e-07	11.4113
GAGE1	-7.46477	-2.58034	-9.02133	1.19691e-08	2.79641e-06	10.0639
GALNT14	-7.77904	-2.87165	-14.5577	2.09788e-12	1.57253e-09	18.4341
NDRG1	-7.89806	-4.05513	-18.6337	1.72784e-14	2.39107e-11	22.8297
PIK3CG	-8.08951	-3.49437	-15.5058	6.2513e-13	5.62305e-10	19.5649
RTL6	-8.17393	-3.8326	-21.705	8.30062e-16	2.4888e-12	25.468
SFMBT2	-8.38129	-0.38	-17.5278	5.76026e-14	6.47669e-11	21.7501
LINC01419	-8.43088	1.53126	-13.5801	7.84359e-12	5.03951e-09	17.1882
ALCAM	-8.4702	-2.16177	-17.1265	9.06533e-14	9.06029e-11	21.3392
NETO1	-8.69798	-3.79149	-17.5489	5.62576e-14	6.47669e-11	21.7715
IL13RA2	-9.24701	-1.86678	-12.9851	1.81812e-11	1.07694e-08	16.387
SOX9	-10.4288	-3.07195	-16.6474	1.57732e-13	1.49347e-10	20.8342

## Sheet: A8
	logFC	AveExpr	t	P.Value	adj.P.Val	B
LINC02780	8.08873	-0.702579	16.0491	3.21216e-13	3.04141e-10	20.0777
CTPS2	7.38008	1.52964	20.3584	2.98452e-15	4.83178e-12	24.1818
CRACR2A	6.64983	0.769537	17.6926	4.79374e-14	5.7493e-11	21.7807
NR0B1	6.43242	1.85647	21.1959	1.33486e-15	3.00177e-12	24.8565
ENSG00000284703	6.13533	-2.40868	18.3935	2.23197e-14	2.86809e-11	22.4524
ANXA3	6.07547	3.30529	25.3208	3.72348e-17	1.67464e-13	27.7246
LRRC4C	5.93718	1.6098	9.53327	4.68963e-09	1.62243e-06	10.9913
ARHGAP6	5.39541	-1.25923	8.80097	1.80976e-08	5.00885e-06	9.66701
ENSG00000280202	5.30588	-1.50453	12.0222	7.575e-11	4.73357e-08	14.9826
PTPN20	5.2802	-2.78204	7.96054	9.28083e-08	1.94142e-05	8.05571
TRPM2	5.12361	0.489762	9.15167	9.3997e-09	2.77214e-06	10.3103
NHS	4.80637	-0.904484	5.67998	1.25321e-05	0.0011106	3.19339
GDNF	4.7124	0.934994	10.1984	1.45578e-09	6.38767e-07	12.1322
ZNF22	4.67158	2.58695	20.6161	2.32261e-15	4.64264e-12	24.3931
GAP43	4.54235	-0.401966	8.33699	4.41158e-08	1.04427e-05	8.78972
SLITRK3	4.49538	-2.5886	7.6315	1.80564e-07	3.34881e-05	7.3977
MT-TM	4.48812	0.820935	8.97083	1.31515e-08	3.81605e-06	9.98068
GDNF-AS1	4.43282	-0.853665	9.82714	2.77873e-09	1.11087e-06	11.5025
PID1	4.3962	-2.49877	7.75444	1.40572e-07	2.80988e-05	7.64534
ASNSP1	4.32591	-0.40376	4.64959	0.000139486	0.00670951	0.810281
OR7E19P	4.3049	-0.368868	4.35878	0.00027869	0.0114003	0.129536
CEP164P1	4.19488	0.88579	5.63566	1.38734e-05	0.00119418	3.09258
ENSG00000279675	4.13608	-2.12855	5.67342	1.27217e-05	0.00111774	3.1785
PAK3	4.07019	-0.0289162	4.1084	0.000506385	0.0181306	-0.455688
COL4A6	3.91373	-0.270431	9.59448	4.20163e-09	1.5426e-06	11.0987
ESX1	3.84731	-2.83487	5.45661	2.0965e-05	0.00162569	2.68337
PTCHD1	3.82658	1.86889	9.31363	6.98215e-09	2.24302e-06	10.6017
ARHGAP20	3.81883	-3.53318	6.73638	1.18806e-06	0.000164409	5.53088
ENSG00000279497	3.81052	-1.61909	4.83407	9.00839e-05	0.00506441	1.24142
RSPO4	3.79732	0.444747	8.59381	2.68471e-08	6.8997e-06	9.27902
TDRD9	3.79715	3.72777	9.4933	5.03964e-09	1.71062e-06	10.9209
LRMDA	3.69604	-1.95499	8.83684	1.69125e-08	4.75399e-06	9.73358
ENSG00000233470	3.68312	-2.21841	7.36923	3.10126e-07	5.21418e-05	6.86227
SPEF2	3.65291	-1.41315	7.07465	5.75671e-07	8.85156e-05	6.24938
KNOP1P5	3.62189	-1.9765	6.10748	4.75235e-06	0.000515029	4.15528
GAS6-DT	3.60136	0.477659	7.13882	5.02606e-07	7.79473e-05	6.38391
HSPB8	3.59512	1.16818	6.64469	1.44962e-06	0.00019608	5.33348
LINC01111	3.52433	-0.587899	4.2297	0.000379156	0.0144208	-0.17242
ZNF22-AS1	3.48804	-0.688406	7.30684	3.53193e-07	5.8293e-05	6.73348
LINC01173	3.43103	-1.29615	6.4012	2.47186e-06	0.000300181	4.80394
MACROH2A2	3.40467	2.2739	6.30569	3.05367e-06	0.000361418	4.59418
PWWP3B	3.39493	-3.61082	5.78999	9.74534e-06	0.000917898	3.44281
TTC9	3.37622	0.257187	4.95026	6.84698e-05	0.00410591	1.51231
IGSF11	3.32226	-2.34716	4.20284	0.000404249	0.0151194	-0.235202
FRMPD3	3.24757	-0.532753	7.769	1.36483e-07	2.75879e-05	7.67454
LDB2	3.19261	0.634979	7.99204	8.71464e-08	1.88184e-05	8.11789
ARHGAP22	3.17839	0.0088169	5.07776	5.07236e-05	0.00322444	1.80881
ENSG00000286913	3.1596	-1.16791	7.55269	2.12228e-07	3.70677e-05	7.23782
ADAMTS18	3.11397	-1.22703	4.26766	0.000346333	0.0134279	-0.0836647
BASP1	3.10188	4.15118	12.0175	7.63055e-11	4.73357e-08	14.9756
ZNF558	3.07569	0.913824	9.1793	8.9327e-09	2.72372e-06	10.3603
STXBP6	3.04625	-2.40295	3.81853	0.00100999	0.0297864	-1.12909
ERC2	3.01902	1.24461	14.764	1.60307e-12	1.25388e-09	18.6069
LIPG	2.99947	-0.878029	6.79342	1.05031e-06	0.000152379	5.65312
ANKRD1	2.98323	7.43898	3.57655	0.00179189	0.0447724	-1.68509
SYN2	2.96804	-0.625434	3.76946	0.00113486	0.0321513	-1.24239
PPP1R1C	2.94205	-0.667482	5.34132	2.73953e-05	0.0020116	2.41839
ENSG00000236453	2.87663	2.10217	8.54238	2.9634e-08	7.50862e-06	9.18178
THRB	2.87174	-0.2313	5.25235	3.37056e-05	0.00238726	2.21316
ENSG00000260328	2.8651	-0.0392393	12.3483	4.62759e-11	3.08334e-08	15.4524
NMNAT3	2.85512	0.276924	8.72403	2.0939e-08	5.62227e-06	9.5236
PARP11	2.8306	0.334824	7.67358	1.65696e-07	3.17114e-05	7.48271
SOX6	2.78814	-1.18362	3.64985	0.00150687	0.0392308	-1.51743
ENSG00000275216	2.7584	3.40301	7.66448	1.688e-07	3.19654e-05	7.46435
ZNF711	2.73876	1.86771	3.76744	0.0011403	0.0322547	-1.24704
PPARG	2.72697	0.414012	4.37338	0.000269158	0.011157	0.163706
SERPINB7	2.71088	3.55653	5.49526	1.91722e-05	0.0015191	2.77195
ZNF404	2.65768	6.14075	4.66056	0.0001359	0.00657214	0.835944
CALHM5	2.65112	1.68599	10.3218	1.17838e-09	5.57871e-07	12.3377
ENSG00000231424	2.64808	-2.25462	5.15051	4.27677e-05	0.00285392	1.97754
LINC01896	2.64653	5.63949	4.69794	0.000124364	0.00620036	0.923362
ENSG00000286613	2.62281	1.74661	4.73818	0.000113045	0.00589473	1.01744
CALHM4	2.5728	2.12925	4.10726	0.000507766	0.0181306	-0.458352
CYP4F35P	2.56186	1.44907	4.01879	0.000627011	0.0213252	-0.664491
HIF1A-AS3	2.55896	0.882929	5.69416	1.21312e-05	0.00108578	3.22563
ENSG00000234520	2.55676	-1.77697	4.3781	0.000266149	0.0111091	0.174744
GAS6	2.54622	5.09943	7.55495	2.11243e-07	3.70677e-05	7.24242
ENSG00000267251	2.53562	-2.03207	5.41651	2.30063e-05	0.00174634	2.59132
RPRM	2.52925	1.45074	6.4389	2.27467e-06	0.000286163	4.88644
KIF26A	2.52254	2.00758	9.54589	4.58436e-09	1.61711e-06	11.0135
ENSG00000250284	2.51924	-0.234638	6.41036	2.42239e-06	0.000296678	4.824
COL4A5	2.51366	1.53283	4.63777	0.000143459	0.00682757	0.782616
LINC02057	2.50037	-0.666381	7.41791	2.80307e-07	4.75728e-05	6.96239
PCSK5	2.4528	-0.900016	4.39838	0.000253586	0.0106589	0.222236
ENSG00000267150	2.44224	-0.647973	4.73008	0.000115237	0.00595366	0.998503
TP53	2.44091	8.26434	7.29532	3.61803e-07	5.91712e-05	6.70962
KRT34	2.43152	-0.219494	4.43794	0.000230777	0.00993224	0.314839
SCIRT	2.42964	-0.99868	5.06615	5.21262e-05	0.00329035	1.78184
ARL14EPL	2.41718	-1.34267	3.64779	0.00151423	0.0393657	-1.52216
MAD1L1	2.41327	2.52675	4.4195	0.000241139	0.0102437	0.271681
CCNA1	2.40465	2.55857	6.58544	1.64948e-06	0.000219808	5.20533
B3GALT5	2.4011	-0.638038	3.55703	0.00187636	0.0460514	-1.72961
KRT8P10	2.39504	-1.26047	4.31217	0.000311453	0.0123687	0.0204496
FAM189A2	2.39133	0.499936	5.98908	6.20337e-06	0.000637707	3.89089
ENSG00000278917	2.38999	3.26182	5.19161	3.88443e-05	0.002647	2.07273
SPAG6	2.36168	-1.61854	4.71489	0.000119462	0.00608484	0.963005
LINC01094	2.3503	-1.07767	4.52821	0.000186141	0.00839269	0.526201
INSR	2.34389	0.211357	6.01673	5.82822e-06	0.000602584	3.95279
MVB12B	2.33853	0.801325	3.86217	0.000910455	0.0278083	-1.02814
FGF1	2.31766	4.24006	6.214	3.7447e-06	0.000423693	4.39175
SUN3	2.30796	2.81603	7.61637	1.86241e-07	3.41884e-05	7.36707
ENSG00000237870	2.30337	0.600731	3.96519	0.000712444	0.0233884	-0.789157
GAS6-AS1	2.29794	3.03994	8.40794	3.84265e-08	9.46975e-06	8.92582
ADCY1	2.28767	-2.768	4.37472	0.000268298	0.0111471	0.166848
EBF3	2.25692	0.955032	5.91406	7.3505e-06	0.000738746	3.72256
BDH1	2.25115	-0.514656	5.23614	3.50056e-05	0.00245997	2.1757
SAMD9L	2.16667	1.25672	3.62652	0.00159233	0.0410402	-1.57086
KRT8P3	2.15781	3.22389	10.7855	5.40774e-10	2.77958e-07	13.0928
CDYL2	2.14662	2.49685	5.88904	7.77953e-06	0.000760618	3.66628
ZNF283	2.14396	6.32476	3.96424	0.000714043	0.0233982	-0.791344
GHDC	2.1428	2.42938	5.28352	3.13418e-05	0.00223579	2.28514
AOX1	2.13623	4.65705	5.57967	1.57797e-05	0.00133276	2.96494
FOXG1-AS1	2.12422	-0.485623	5.14986	4.28326e-05	0.00285392	1.97604
DPF3	2.11202	0.945316	5.49345	1.92526e-05	0.0015191	2.7678
TSHZ3	2.1065	1.32946	5.08626	4.9722e-05	0.00320609	1.82853
DYSF	2.08083	0.628664	3.72883	0.00124972	0.0341679	-1.33601
CDX2	2.07705	-2.1117	4.15688	0.00045108	0.016629	-0.342533
HKDC1	2.06526	-0.850219	3.79981	0.00105595	0.0308384	-1.17235
MGLL	2.06247	6.38337	5.46969	2.03398e-05	0.00159092	2.71337
GBP1	2.06137	1.50546	4.89511	7.79832e-05	0.00455493	1.38381
PTCHD4	2.05142	-1.40512	5.39546	2.41572e-05	0.001826	2.54297
PLPP3	2.04544	0.265564	4.27627	0.000339294	0.0132149	-0.0635318
LINC00513	2.04212	5.0189	5.20622	3.75399e-05	0.00259747	2.10653
SH3GL2	2.02635	0.159227	6.08825	4.96192e-06	0.000531339	4.11246
RASGRP1	2.02033	0.915641	4.17129	0.00043584	0.0161332	-0.308888
SALL3	2.01623	6.66648	3.87583	0.000881341	0.0272296	-0.996498
ENSG00000287016	2.00371	0.615921	6.39857	2.48621e-06	0.000300181	4.7982
CIART	1.98508	2.10458	7.96162	9.26075e-08	1.94142e-05	8.05785
ERVMER34-1	1.93827	-0.966607	5.10016	4.81253e-05	0.00312554	1.8608
LYPD5	1.92307	0.296733	3.57526	0.00179734	0.0448085	-1.68802
ISM1	1.91637	-0.0616561	4.66068	0.00013586	0.00657214	0.836229
HIKESHIP1	1.91213	-1.91256	4.10513	0.000510343	0.0181803	-0.463302
PTPRR	1.90586	1.68967	4.9161	7.4214e-05	0.00434889	1.43274
COL16A1	1.89831	1.95148	4.22368	0.000384637	0.0145983	-0.186482
CAMK2N1	1.89432	1.08319	6.41002	2.42421e-06	0.000296678	4.82326
ROBO2	1.88382	-0.983034	4.2814	0.000335164	0.0131309	-0.0515214
NMU	1.87376	1.89327	4.08915	0.000530178	0.0188124	-0.500585
YBX2	1.85618	4.53622	4.23033	0.000378582	0.0144208	-0.170936
RAB9B	1.85475	0.541813	5.62774	1.4128e-05	0.0012103	3.07455
LVRN	1.83248	4.05606	4.17281	0.000434266	0.0161081	-0.305346
KCNK13	1.82505	0.379515	5.19164	3.88419e-05	0.002647	2.0728
NRN1	1.77525	4.69457	9.57798	4.32773e-09	1.55712e-06	11.0698
NKX2-2	1.76701	0.778651	4.83007	9.09406e-05	0.00507685	1.23208
DAW1	1.75951	-0.447161	5.47076	2.02894e-05	0.00159092	2.71583
TRHDE-AS1	1.75677	2.41382	5.65466	1.32813e-05	0.00115174	3.13582
CREB3L1	1.7567	4.035	4.96612	6.59567e-05	0.00398175	1.54925
A1CF	1.74113	-1.41869	4.69867	0.000124148	0.00620036	0.925073
NELL2	1.74092	2.40824	5.82214	9.05713e-06	0.00086669	3.51545
ADAM12	1.73651	0.433	3.5494	0.00191041	0.0464436	-1.74698
PRICKLE1	1.73085	1.0201	5.06339	5.24644e-05	0.00330012	1.77544
SPECC1	1.73023	5.26784	11.684	1.27678e-10	7.17792e-08	14.483
NOL4	1.72518	-0.897944	3.87459	0.000883941	0.0272296	-0.999366
MYO5B	1.71428	4.37429	5.97992	6.3329e-06	0.000647323	3.87039
NKX2-2-AS1	1.69882	-0.210754	4.43291	0.000233557	0.010004	0.303073
GUCY1A2	1.69857	0.569489	3.71953	0.00127759	0.0347189	-1.35741
LINC01186	1.69626	1.18019	4.14291	0.000466368	0.0170182	-0.375152
LINC02575	1.68769	2.01167	8.35069	4.29526e-08	1.03029e-05	8.81606
SLC25A27	1.67379	2.09441	4.52404	0.000187998	0.00841315	0.516436
FOXO1	1.66752	1.4889	3.90928	0.000813902	0.025733	-0.918959
HLA-F-AS1	1.66113	-0.658865	4.00957	0.000640939	0.0216739	-0.685942
SCN5A	1.65143	-0.717508	3.94677	0.00074439	0.024129	-0.831938
NEK10	1.64534	0.790658	3.766	0.00114423	0.032315	-1.25038
PRKAA2	1.64379	2.70737	4.26112	0.000351776	0.0136096	-0.0989546
SNHG22	1.62977	2.34211	4.69801	0.000124342	0.00620036	0.923536
TRHDE	1.62903	2.34868	3.75309	0.00117981	0.0328751	-1.28012
TCP11	1.62853	2.05547	5.16945	4.09119e-05	0.00275674	2.02142
ZNF503	1.6189	2.58673	7.67672	1.6464e-07	3.17114e-05	7.48904
DUSP2	1.61134	-0.389575	3.69952	0.00133966	0.0357633	-1.40343
PHEX	1.60159	-0.777611	4.05347	0.00057726	0.0200869	-0.583741
EN2	1.59911	0.40698	6.74547	1.16493e-06	0.000162458	5.55038
ENSG00000189229	1.594	1.52428	5.52066	1.80795e-05	0.00146509	2.8301
DGCR11	1.56718	0.721118	4.59986	0.000156979	0.00727848	0.693916
KRT8	1.5488	10.6398	4.48785	0.000204914	0.0090575	0.431691
ENSG00000259088	1.5457	-0.873256	4.08282	0.000538239	0.0190608	-0.515337
ENSG00000267655	1.54025	1.01809	3.86726	0.000899484	0.0275668	-1.01634
HSD11B2	1.5363	-0.273485	4.28066	0.000335754	0.0131309	-0.0532462
HNRNPABP1	1.53089	0.359469	3.90408	0.000824039	0.0260078	-0.931018
ENSG00000277806	1.52347	1.19942	4.04646	0.000586979	0.0203856	-0.600054
PSTPIP2	1.52327	1.41634	3.75144	0.00118445	0.0329241	-1.28393
DPF1	1.50388	5.40279	4.71393	0.000119735	0.00608484	0.960751
ENSG00000226380	1.50103	4.02032	6.51138	1.93973e-06	0.000245744	5.0445
PRAG1	-1.5028	0.272386	-4.25101	0.000360365	0.0138525	-0.122602
SSTR2	-1.51088	-0.343323	-3.91109	0.000810401	0.0256674	-0.914757
ESAM	-1.51389	-0.411727	-3.68848	0.00137515	0.0365421	-1.42879
ENSG00000274904	-1.53346	0.112561	-4.22192	0.000386256	0.0146289	-0.190599
GAL3ST4	-1.53921	-1.0756	-4.35874	0.000278715	0.0114003	0.129445
AP1S1	-1.54216	7.40044	-3.9793	0.000688881	0.0227812	-0.756346
TMCC3	-1.54783	3.44481	-5.36311	2.60419e-05	0.00194011	2.46856
SLC45A4	-1.54792	3.50666	-8.1827	5.97014e-08	1.35953e-05	8.49131
ENSG00000253645	-1.55233	-0.34299	-3.78737	0.0010876	0.0314564	-1.20106
SPIRE2	-1.55548	2.93528	-4.71458	0.000119549	0.00608484	0.962289
LTBP2	-1.55653	4.24085	-4.29703	0.000322898	0.0127769	-0.014954
KLHL26	-1.56266	-2.9265	-3.74579	0.00120043	0.0332753	-1.29694
RASGEF1A	-1.56759	1.18439	-4.81352	9.45702e-05	0.00521876	1.19346
QRICH2	-1.58483	0.984136	-5.8227	9.04552e-06	0.00086669	3.51672
CARD8	-1.58951	4.9071	-5.9092	7.43185e-06	0.0007398	3.71164
FGF5	-1.59118	4.57517	-4.87035	8.26797e-05	0.00473944	1.32608
DCBLD2	-1.59529	6.79551	-4.20995	0.000397447	0.0149271	-0.218581
LINC01301	-1.59872	-1.95325	-3.62307	0.00160538	0.0413174	-1.57876
CELSR1	-1.60365	3.45586	-5.62045	1.43667e-05	0.00122491	3.05794
THBS3-AS1	-1.62822	2.27311	-4.34989	0.00028466	0.0115599	0.108729
BRSK2	-1.63344	-0.386819	-4.24386	0.000366562	0.0140308	-0.139315
MAPT	-1.64251	0.347489	-3.55786	0.00187269	0.0460242	-1.72772
CEL	-1.64479	-0.901096	-3.75461	0.00117557	0.0328734	-1.27663
TTYH2	-1.64963	1.77969	-7.19827	4.43431e-07	7.05959e-05	6.50805
PCDHB1-AS1	-1.65152	1.15296	-4.70785	0.000121474	0.00615345	0.946535
PCDHB2	-1.6533	1.67871	-5.17899	4.00085e-05	0.00271605	2.04352
SYP	-1.65983	0.878273	-5.15459	4.23604e-05	0.00284352	1.987
STC1	-1.66089	4.40509	-3.775	0.00112004	0.0318765	-1.22962
PUDP	-1.66461	2.82292	-6.55126	1.77744e-06	0.000231711	5.1312
EMP2	-1.66797	1.74733	-3.90189	0.000828336	0.0260977	-0.936086
POU3F3	-1.68904	-2.68813	-4.04436	0.000589936	0.0204348	-0.604961
PATL2	-1.68954	-0.585245	-3.893	0.00084605	0.0264244	-0.956699
ENSG00000259347	-1.69204	0.254055	-5.74931	1.06934e-05	0.000991623	3.35073
SLIT3	-1.70784	-0.0102404	-3.55394	0.00189005	0.0460732	-1.73663
RNF212	-1.70874	1.21929	-6.56704	1.71713e-06	0.000225483	5.16545
CCDC92B	-1.71542	-1.4006	-4.6345	0.000144575	0.00682939	0.774982
ALDH2	-1.72778	0.831694	-3.92508	0.000783847	0.0249583	-0.882291
APLP1	-1.73262	4.24547	-4.83461	8.99685e-05	0.00506441	1.24268
NPTX1	-1.74035	-1.00052	-4.76048	0.000107226	0.00574185	1.06955
GREB1	-1.741	0.40474	-4.32186	0.000304334	0.0122171	0.0431358
ZNF582-DT	-1.75005	1.42377	-5.54132	1.72379e-05	0.00142907	2.87734
THBS3	-1.75195	3.43822	-4.6256	0.000147664	0.00693595	0.754159
SEMA4B	-1.75264	4.7508	-4.52198	0.000188925	0.00843364	0.511599
PNPLA3	-1.7609	-0.642719	-4.69909	0.000124025	0.00620036	0.926052
MAFA	-1.76869	-1.21871	-3.90003	0.000832015	0.026143	-0.940403
GABRB3	-1.76967	2.23961	-4.78346	0.000101544	0.00553571	1.12325
ENSG00000287486	-1.78199	-1.44964	-4.06188	0.000565799	0.0197262	-0.564145
STS	-1.78816	-0.746504	-5.07571	5.09689e-05	0.00322863	1.80404
HOGA1	-1.79206	-1.75669	-3.85618	0.00092351	0.0281116	-1.042
ENSG00000286388	-1.79593	1.75684	-7.50881	2.32284e-07	4.01806e-05	7.14844
ICOSLG	-1.81201	-0.803858	-3.55425	0.00188868	0.0460732	-1.73593
SDC1	-1.81517	3.60821	-5.01153	5.92685e-05	0.00362667	1.6549
ZIC1	-1.81843	0.942195	-4.69774	0.000124421	0.00620036	0.922911
PPP1R3F	-1.82034	-1.03856	-4.4689	0.000214371	0.00936052	0.387328
LINC01232	-1.8215	-1.36166	-4.32013	0.000305596	0.0122171	0.039076
CLIP3	-1.84273	4.20944	-3.94076	0.000755118	0.0244327	-0.845889
ARHGAP44	-1.84455	-0.569327	-5.05471	5.35455e-05	0.00335639	1.75528
HSPA2	-1.85275	2.22497	-6.37561	2.61556e-06	0.000313693	4.74787
ISG15	-1.85848	2.61381	-3.55555	0.00188288	0.0460732	-1.73296
CMBL	-1.87332	4.23425	-7.65082	1.73573e-07	3.25269e-05	7.43676
ALPK1	-1.88237	1.59436	-4.72912	0.000115499	0.00595366	0.996263
MAP1A	-1.94564	1.38076	-6.12077	4.61275e-06	0.000505543	4.18486
ABCD1	-1.96276	1.87765	-4.67273	0.000132029	0.00647194	0.864416
ENSG00000261786	-1.9863	-0.839787	-4.13327	0.000477217	0.0173788	-0.397653
NMNAT2	-1.99602	-1.02541	-4.09674	0.00052066	0.0185112	-0.482873
CEACAM19	-1.9996	0.591888	-5.49384	1.9235e-05	0.0015191	2.76871
TNFRSF9	-1.99977	0.281112	-5.11107	4.69094e-05	0.00305761	1.88611
H6PD	-2	2.86773	-4.39864	0.000253431	0.0106589	0.222837
MAMSTR	-2.00426	0.230874	-3.60829	0.00166246	0.0424221	-1.61257
CCL28	-2.00474	0.605669	-6.77781	1.08629e-06	0.000153877	5.61971
ADAMTSL4	-2.02509	1.58089	-4.66736	0.000133722	0.00652003	0.85186
KCNAB2	-2.02709	-0.102553	-4.92855	7.20663e-05	0.00423684	1.46174
RNASEL	-2.03804	0.447162	-5.29892	3.0237e-05	0.00218459	2.32067
FHL1	-2.04806	4.27229	-4.72464	0.000116732	0.00600001	0.985796
ENSG00000256013	-2.05498	-1.42151	-4.7391	0.000112798	0.00589473	1.0196
ADAMTSL4-AS1	-2.05578	0.249451	-3.68256	0.00139457	0.0370033	-1.44238
ODAD4	-2.07637	-1.5307	-3.55492	0.00188571	0.0460732	-1.73441
NOTCH3	-2.0765	0.883796	-4.824	9.22542e-05	0.00510663	1.21792
APOBEC3D	-2.09007	-1.46733	-5.7498	1.06814e-05	0.000991623	3.35184
GPR153	-2.10273	-0.0639346	-5.5024	1.88584e-05	0.00150783	2.7883
PPFIBP2	-2.10583	0.409485	-4.14594	0.000463016	0.0169344	-0.368093
HSF2BP	-2.10644	-0.969692	-5.01697	5.85144e-05	0.00359275	1.66756
PCDHB14	-2.1069	0.0644966	-5.46582	2.05229e-05	0.0015983	2.70449
SLC12A7	-2.11413	1.66246	-7.82996	1.20654e-07	2.46655e-05	7.79641
PCDHB11	-2.12684	-0.123748	-5.2839	3.13143e-05	0.00223579	2.28601
ENSG00000260430	-2.14203	-1.02981	-5.20659	3.75071e-05	0.00259747	2.1074
NOS3	-2.143	-1.6777	-4.25855	0.000353936	0.0136638	-0.104955
ACRBP	-2.16773	-2.02944	-3.54216	0.00194328	0.0469887	-1.76346
FAM78A	-2.17094	0.48878	-8.68455	2.25725e-08	5.97174e-06	9.4497
ENSG00000270195	-2.19448	-0.856234	-3.73258	0.00123864	0.0339288	-1.32736
CDK18	-2.22031	-1.35453	-4.11377	0.000499943	0.0179579	-0.443166
FMN2	-2.23878	-2.58916	-3.87125	0.000891002	0.0273534	-1.00711
OCA2	-2.24747	-1.30902	-3.77571	0.00111815	0.0318765	-1.22798
LIF	-2.26252	2.49201	-7.57486	2.02778e-07	3.65756e-05	7.28289
TERT	-2.28015	1.40455	-6.33092	2.88754e-06	0.000344019	4.6497
ATF7IP2	-2.28131	0.436002	-6.02796	5.68258e-06	0.000590923	3.9779
CLIP4	-2.28275	-0.040081	-4.33729	0.000293341	0.0118323	0.0792428
ENSG00000287271	-2.29936	-0.159945	-5.7452	1.07945e-05	0.000995862	3.3414
SCNN1D	-2.30184	0.563509	-3.93383	0.000767694	0.0246551	-0.861993
PXDN	-2.31317	4.19918	-5.81633	9.17755e-06	0.000873566	3.50235
SFMBT2	-2.33139	-0.38	-4.87563	8.1655e-05	0.00470825	1.33839
NTSR1	-2.34147	3.34526	-4.14913	0.000459503	0.0168703	-0.36064
OPLAH	-2.34305	-0.424735	-3.58377	0.00176158	0.0441378	-1.66859
PADI2	-2.34582	-2.33749	-3.78489	0.00109403	0.0315313	-1.20679
LGALS3BP	-2.35398	3.86581	-3.68073	0.00140064	0.0370856	-1.44659
CACNA1B	-2.3617	0.281901	-5.6981	1.20223e-05	0.00108141	3.23457
SPARC	-2.36338	1.10787	-4.16337	0.000444155	0.0164073	-0.327388
PRICKLE2	-2.40513	-1.91607	-3.69859	0.00134259	0.0357825	-1.40555
BARX2	-2.47628	0.271088	-6.11846	4.63672e-06	0.000505543	4.17972
NKD2	-2.4897	0.466187	-3.72494	0.0012613	0.0344321	-1.34496
ST8SIA5	-2.49627	-1.22669	-3.60246	0.00168551	0.0428116	-1.62589
ENSG00000225032	-2.49931	0.0677955	-4.6825	0.000129004	0.0063661	0.887257
LRP1	-2.5151	2.57067	-4.41697	0.000242599	0.0102691	0.26575
ENSG00000267992	-2.55181	-0.17326	-6.093	4.90926e-06	0.000528848	4.12304
ARHGAP29	-2.57518	0.820317	-3.66489	0.00145417	0.0380794	-1.48295
YPEL3	-2.60706	-1.379	-6.42421	2.34953e-06	0.000293528	4.85431
PANX2	-2.64484	0.235839	-6.22908	3.62094e-06	0.000412535	4.4251
PDCD6P1	-2.67542	1.78039	-6.80776	1.01835e-06	0.000148944	5.68378
ROR2	-2.6872	0.150473	-5.3015	3.00562e-05	0.00218028	2.3266
MXRA8	-2.68907	0.845964	-5.72544	1.12932e-05	0.00102093	3.29661
FBXO27	-2.70358	2.81411	-7.56874	2.05344e-07	3.65756e-05	7.27045
GALNT6	-2.71585	2.33109	-7.90314	1.04126e-07	2.15313e-05	7.94202
ARHGDIB	-2.71905	1.22721	-4.06852	0.000556906	0.0194917	-0.548664
BMERB1	-2.72711	0.461585	-5.50653	1.86794e-05	0.00150019	2.79775
HOXA10	-2.73204	0.971349	-9.81256	2.85114e-09	1.11504e-06	11.4774
NES	-2.75497	-0.03671	-6.27847	3.24397e-06	0.000378954	4.53419
PREX1	-2.76157	0.764118	-4.80043	9.75471e-05	0.00535022	1.16288
ATG9B	-2.76916	-2.28291	-4.51875	0.000190381	0.0084776	0.504046
FCHO1	-2.78016	-0.467106	-5.3497	2.68668e-05	0.00198088	2.43768
ERRFI1	-2.78335	6.26135	-7.46319	2.55224e-07	4.37284e-05	7.0552
MAGEA1	-2.78409	0.521564	-4.72938	0.000115426	0.00595366	0.996886
ENSG00000268191	-2.80141	-3.06673	-3.98052	0.000686892	0.0227572	-0.753524
HOXA10-AS	-2.81472	0.141581	-8.15929	6.2523e-08	1.40599e-05	8.44574
GABRD	-2.83933	-1.72433	-4.35857	0.000278828	0.0114003	0.129048
MGMT	-2.85581	-3.19217	-5.25064	3.38403e-05	0.0023874	2.20921
SPP1	-2.86698	2.62289	-6.20291	3.83856e-06	0.000431598	4.36718
ADGRB1	-2.87901	1.8154	-5.79949	9.53653e-06	0.000902958	3.46429
ENSG00000225399	-2.89945	-3.91598	-5.65351	1.33164e-05	0.00115174	3.13321
PDZD4	-2.91078	-1.59	-5.12446	4.54594e-05	0.00299566	1.91716
ENSG00000269896	-2.92382	-0.518593	-5.35993	2.62351e-05	0.00194226	2.46124
PPP2R2C	-2.95761	0.783128	-10.1344	1.62545e-09	6.96234e-07	12.025
ECHDC3	-2.99391	-1.85283	-5.07914	5.05593e-05	0.00322444	1.81201
ALPK2	-2.99423	0.0959023	-6.26059	3.37555e-06	0.000391781	4.49474
TUBB4A	-2.99923	-0.530912	-5.89929	7.60077e-06	0.000747201	3.68934
SIGIRR	-3.01405	1.88786	-4.12607	0.00048548	0.0176084	-0.414449
LINC01106	-3.02158	-2.32049	-4.18635	0.000420459	0.0156606	-0.273709
TM4SF19	-3.03059	-1.35367	-6.768	1.10955e-06	0.000155943	5.5987
SCARF1	-3.04394	0.860716	-13.5018	8.74551e-12	6.29327e-09	17.0273
TNFSF9	-3.0446	-2.73231	-6.2288	3.62315e-06	0.000412535	4.42449
DNAH10	-3.04672	-1.86078	-4.98224	6.34989e-05	0.00385928	1.58677
GPR132	-3.06609	-2.04038	-4.74996	0.000109933	0.00581674	1.04497
RTBDN	-3.08841	0.320061	-4.34209	0.000290006	0.0117505	0.0904646
ARHGEF4	-3.13814	0.563608	-7.32396	3.40797e-07	5.67679e-05	6.76887
AP1G2-AS1	-3.14389	-0.677155	-5.21046	3.71694e-05	0.00259177	2.11635
ENSG00000267424	-3.16421	-1.2595	-3.63188	0.0015723	0.0406491	-1.5586
AFF3	-3.19026	-2.37142	-4.29195	0.000326834	0.0128379	-0.0268378
TMEM171	-3.26895	-1.73195	-6.88914	8.54928e-07	0.000126067	5.85726
SFRP1	-3.28809	-1.03203	-4.96429	6.62414e-05	0.00398556	1.545
ESPNL	-3.29217	-1.13077	-4.77704	0.0001031	0.00558665	1.10826
PCDHGA10	-3.31985	-2.03342	-4.73892	0.000112847	0.00589473	1.01917
LRRK1	-3.36401	-1.22003	-5.14762	4.3058e-05	0.00285835	1.97085
EYA1	-3.38284	-2.76517	-4.60688	0.000154383	0.00717664	0.710332
HECW1	-3.39487	-1.80124	-6.66458	1.38826e-06	0.000190647	5.37639
DOCK8	-3.47819	-2.99431	-4.63946	0.000142883	0.00681822	0.786576
VGF	-3.57066	5.69548	-5.42663	2.24726e-05	0.00172035	2.61457
AP1G2	-3.57583	0.271125	-7.16931	4.71307e-07	7.37288e-05	6.44763
ACOX2	-3.64158	-0.605077	-6.41208	2.41319e-06	0.000296678	4.82778
SLC45A1	-3.6837	-2.12987	-3.72142	0.00127188	0.034616	-1.35307
ERG	-3.71771	-2.97835	-5.02371	5.75944e-05	0.00356056	1.68322
PRDM1	-3.76942	-1.46665	-5.12066	4.5866e-05	0.00300177	1.90836
NYNRIN	-3.77496	-0.226678	-6.89109	8.51351e-07	0.000126067	5.86142
L1CAM	-3.87525	-2.69381	-5.44522	2.15253e-05	0.00166198	2.65724
GLB1L3	-3.92564	-0.663409	-7.98791	8.7868e-08	1.88184e-05	8.10974
ENSG00000258902	-3.93531	-1.69303	-6.19133	3.93907e-06	0.000437431	4.34153
ZIC4	-3.99198	-3.10737	-4.88858	7.91954e-05	0.00461076	1.36858
ENG	-3.9983	1.1707	-6.54051	1.81974e-06	0.000235519	5.10786
COL13A1	-4.09051	-0.727085	-5.55825	1.65778e-05	0.00138072	2.91604
SLC39A4	-4.09632	2.27802	-7.57223	2.03879e-07	3.65756e-05	7.27754
VWA1	-4.10521	0.662403	-6.03452	5.5992e-06	0.000589063	3.99256
TUB	-4.11396	-3.69412	-8.53512	3.00512e-08	7.50862e-06	9.16801
ZDHHC11	-4.16659	-1.0085	-9.16503	9.17086e-09	2.74973e-06	10.3345
CD70	-4.24762	-1.55139	-5.83559	8.78406e-06	0.000849598	3.54581
CLEC11A	-4.3151	-1.94488	-4.93975	7.01867e-05	0.00418099	1.48784
CEND1	-4.33215	-1.65271	-5.90524	7.4988e-06	0.000741228	3.70274
RFPL4A	-4.36663	-2.31951	-5.04119	5.52744e-05	0.00344078	1.72386
MIR2052HG	-4.48049	-4.05193	-7.28047	3.73212e-07	6.04872e-05	6.67886
TMEM88	-4.58194	-2.05095	-7.67439	1.65424e-07	3.17114e-05	7.48434
TRIM71	-4.60539	-3.41213	-6.99238	6.85643e-07	0.000103653	6.07607
ZNF280A	-4.69264	-1.09687	-10.4779	9.04201e-10	4.39637e-07	12.5948
NAP1L2	-4.76315	-2.08089	-6.08353	5.0148e-06	0.000533823	4.10194
FLRT2	-4.87649	-4.14006	-10.2778	1.27031e-09	5.85973e-07	12.2647
RAB38	-4.9181	-2.69971	-10.0137	2.00399e-09	8.19357e-07	11.8211
NPAS2	-5.07674	-2.52515	-10.2537	1.32382e-09	5.9539e-07	12.2246
SPATC1	-5.14773	-4.56368	-21.4648	1.03732e-15	2.6659e-12	25.0658
FAM230C	-5.15488	-4.25486	-11.0956	3.25478e-10	1.72216e-07	13.5832
RPS6KA2	-5.18989	-4.54338	-15.68	5.03892e-13	4.53251e-10	19.6685
NAT16	-5.20287	-2.16759	-6.14733	4.34634e-06	0.000479697	4.2439
SOX4	-5.25409	-1.94782	-8.87686	1.56847e-08	4.47885e-06	9.80765
FBXL7	-5.27	-1.03639	-9.20965	8.44738e-09	2.62014e-06	10.415
ENSG00000232111	-5.29724	-4.60181	-43.275	6.33375e-22	1.13944e-17	34.8298
SUMO1P1	-5.32109	-4.20842	-10.0592	1.85142e-09	7.74583e-07	11.8983
GFRA1	-5.33446	-3.75546	-9.46863	5.26919e-09	1.75542e-06	10.8773
ENSG00000284837	-5.35103	-4.24638	-11.8474	9.90856e-11	5.94183e-08	14.7258
TMEM156	-5.35486	-0.992337	-8.28648	4.86921e-08	1.12304e-05	8.69239
ENPP4	-5.45625	-4.51217	-20.3528	3.00099e-15	4.83178e-12	24.1772
ENSG00000287407	-5.46749	-1.79633	-5.51168	1.84583e-05	0.00148908	2.80955
PTPRS	-5.61375	-2.85002	-11.2426	2.56749e-10	1.39967e-07	13.8118
SMPD5	-5.62602	-2.84778	-7.71894	1.51078e-07	2.9867e-05	7.57406
CACNA1A	-5.73389	-2.92135	-8.06268	7.57087e-08	1.66098e-05	8.25684
BMP7	-6.08222	-4.22844	-20.28	3.22298e-15	4.83178e-12	24.1168
SORCS2	-6.3722	-3.09903	-8.39805	3.91712e-08	9.52283e-06	8.9069
MYO10	-6.60274	-2.85489	-9.6434	3.84971e-09	1.44284e-06	11.1842
RIPK4	-6.69457	-4.36892	-32.1777	2.81917e-19	2.53585e-15	31.2297
GAGE1	-6.69529	-2.58034	-8.0914	7.15121e-08	1.58828e-05	8.31314
LINC00511	-6.80466	-1.68332	-9.27036	7.55695e-09	2.38508e-06	10.5242
ADPRH	-6.95338	-4.12682	-26.8344	1.14672e-17	6.87649e-14	28.616
ZC3HAV1L	-6.97096	-4.22961	-15.3261	7.82511e-13	6.70351e-10	19.2664
LINC01419	-7.33183	1.53126	-11.8098	1.05012e-10	6.09406e-08	14.6703
ALCAM	-7.33393	-2.16177	-14.829	1.47376e-12	1.20514e-09	18.6845
MIR4527HG	-7.37326	-3.04934	-9.77395	3.05245e-09	1.16837e-06	11.4108
GALNT14	-7.38479	-2.87165	-13.8199	5.63628e-12	4.22486e-09	17.4388
TNFRSF8	-7.39135	-2.65445	-10.7095	6.13389e-10	3.06524e-07	12.9709
LDHAL6FP	-7.71947	-4.07117	-24.7846	5.74204e-17	2.06599e-13	27.3899
SYCE1	-7.77901	-2.72279	-8.60275	2.63911e-08	6.88082e-06	9.29588
NDRG1	-7.89806	-4.05513	-18.6337	1.72784e-14	2.39107e-11	22.6757
RTL6	-8.17393	-3.8326	-21.705	8.30062e-16	2.4888e-12	25.2499
CYP 20.00	-8.19964	-2.82514	-9.37941	6.19369e-09	2.0259e-06	10.7191
MAGI2-AS3	-8.29394	-3.39911	-12.7616	2.51305e-11	1.73884e-08	16.032
NETO1	-8.31827	-3.79149	-16.7828	1.34687e-13	1.34612e-10	20.8612
PIK3CG	-8.84894	-3.49437	-16.9615	1.09543e-13	1.15922e-10	21.0461
SOX9	-10.8156	-3.07195	-17.2648	7.74593e-14	8.70933e-11	21.3552

## Sheet: B5
	logFC	AveExpr	t	P.Value	adj.P.Val	B
TRPM2	7.32972	0.489762	13.0922	1.55942e-11	1.12216e-08	16.5154
CTPS2	7.24361	1.52964	19.9819	4.32742e-15	7.07729e-12	23.9803
CRACR2A	6.83156	0.769537	18.1761	2.82125e-14	3.38362e-11	22.338
NR0B1	6.25022	1.85647	20.5955	2.36935e-15	5.32807e-12	24.4977
LTF	5.90576	-3.73518	7.94657	9.54404e-08	1.43068e-05	8.01545
TP53	5.50211	8.26434	16.4445	2.00246e-13	2.11907e-10	20.5744
LRRC4C	5.45783	1.6098	8.76358	1.94249e-08	4.26164e-06	9.59073
ANXA3	5.3446	3.30529	22.2747	4.93715e-16	1.77639e-12	25.8192
ENSG00000280202	5.28126	-1.50453	11.9665	8.2498e-11	4.63793e-08	14.9221
PNPLA4	5.12435	-3.45231	6.6347	1.48147e-06	0.000129377	5.29082
ENSG00000234520	5.1189	-1.77697	8.7654	1.9358e-08	4.26164e-06	9.59413
GDNF	5.10169	0.934994	11.0408	3.55722e-10	1.52368e-07	13.5099
ENSG00000279497	4.98663	-1.61909	6.32609	2.91858e-06	0.000227162	4.6162
AKR1C3	4.9256	-3.29168	7.0139	6.54939e-07	6.54575e-05	6.1027
TMEM71	4.90381	-0.994836	6.0205	5.77893e-06	0.000376551	3.93664
ENSG00000286542	4.90038	-3.19528	6.50623	1.96174e-06	0.000164546	5.01146
ARHGAP6	4.87865	-1.25923	7.95803	9.3276e-08	1.43068e-05	8.03819
SLCO1B3	4.7574	-2.72833	6.05454	5.35253e-06	0.000355589	4.01287
GAP43	4.73943	-0.401966	8.69871	2.19719e-08	4.6503e-06	9.46905
APCDD1L-DT	4.62502	-0.775252	6.8067	1.02066e-06	9.59548e-05	5.66147
KNOP1P5	4.58598	-1.9765	7.73319	1.46766e-07	2.05264e-05	7.58861
MAD1L1	4.56057	2.52675	8.35194	4.2848e-08	7.78623e-06	8.80872
ZNF22	4.4803	2.58695	19.7719	5.33869e-15	8.00359e-12	23.7987
ENSG00000279675	4.46703	-2.12855	6.12738	4.54489e-06	0.000319385	4.17558
OR7E19P	4.45346	-0.368868	4.50921	0.000194755	0.00533279	0.449897
HSPB8	4.38407	1.16818	8.10287	6.99047e-08	1.13296e-05	8.32405
GDNF-AS1	4.36603	-0.853665	9.67906	3.61251e-09	1.08315e-06	11.2469
PLXNA2	4.34966	-0.93563	3.57219	0.0018104	0.0259308	-1.7303
MAGEA1	4.32202	0.521564	7.34191	3.28276e-07	3.91212e-05	6.78924
LRMDA	4.11342	-1.95499	9.83475	2.7417e-09	8.65319e-07	11.5174
CDYL2	4.09979	2.49685	11.2474	2.54785e-10	1.20621e-07	13.8335
EDN1	4.08932	-0.032117	5.54837	1.696e-05	0.000850706	2.8664
RSPO4	3.96842	0.444747	8.98104	1.29031e-08	3.17981e-06	9.99439
ENSG00000287149	3.88669	-0.690323	5.63407	1.3924e-05	0.000742227	3.06236
SLFN12	3.85908	-1.97098	5.49882	1.90151e-05	0.000924545	2.75281
CYP4F29P	3.85871	-1.98177	4.0064	0.000645801	0.0126834	-0.727087
MC5R	3.81975	0.485417	3.74289	0.00120873	0.0197503	-1.33834
LINC01515	3.8145	-1.74982	7.23539	4.10171e-07	4.61131e-05	6.56792
TDRD9	3.79341	3.72777	9.48393	5.12557e-09	1.48724e-06	10.9033
ZNF558	3.73747	0.913824	11.1544	2.9595e-10	1.30761e-07	13.6883
LIPG	3.73148	-0.878029	8.45134	3.53253e-08	6.61981e-06	8.99972
CEP164P1	3.66936	0.88579	4.92964	7.188e-05	0.00255558	1.43431
SERPINB7	3.65657	3.55653	7.41226	2.83614e-07	3.56798e-05	6.93453
ADAMTS18	3.65174	-1.22703	5.00466	6.02346e-05	0.00226699	1.60927
LINC01111	3.63725	-0.587899	4.36521	0.000274449	0.00681953	0.1122
LINC01173	3.58357	-1.29615	6.68578	1.32576e-06	0.000116914	5.4013
ENSG00000286913	3.56808	-1.16791	8.52913	3.03994e-08	5.81793e-06	9.14822
CALHM5	3.55643	1.68599	13.8465	5.43503e-12	4.44437e-09	17.5131
ENSG00000233470	3.52701	-2.21841	7.05689	5.97761e-07	6.14498e-05	6.19354
CCDC141	3.50211	-0.918621	6.05949	5.29326e-06	0.000355589	4.02395
PTPRN	3.46819	-2.04256	4.96396	6.62942e-05	0.00241424	1.51437
PPP1R1C	3.46738	-0.667482	6.29505	3.12665e-06	0.000241409	4.54769
NHS	3.45705	-0.904484	4.0854	0.000534933	0.0109731	-0.542789
ZNF22-AS1	3.45675	-0.688406	7.24129	4.05125e-07	4.58378e-05	6.58022
ENSG00000287095	3.4073	-3.79881	6.59518	1.61477e-06	0.000138332	5.20511
LINC01896	3.34548	5.63949	5.93866	6.95214e-06	0.000434268	3.75281
GAS6-DT	3.33729	0.477659	6.61536	1.54523e-06	0.000133648	5.2489
DPF3	3.32881	0.945316	8.65835	2.37288e-08	4.84281e-06	9.39306
PTPRR	3.30699	1.68967	8.53026	3.03336e-08	5.81793e-06	9.15037
PARP11	3.2987	0.334824	8.94256	1.38657e-08	3.32591e-06	9.92343
ASPG	3.29704	-2.35523	4.39113	0.000258011	0.00656522	0.172959
PTCHD1	3.27903	1.86889	7.98094	8.91002e-08	1.38182e-05	8.0836
ENSG00000236453	3.26856	2.10217	9.70624	3.44201e-09	1.04952e-06	11.2943
INSR	3.26213	0.211357	8.37384	4.10594e-08	7.53733e-06	8.85091
BASP1	3.26187	4.15118	12.6373	3.01468e-11	2.08593e-08	15.8873
ENSG00000286613	3.25949	1.74661	5.88837	7.79141e-06	0.000478387	3.63948
ELN-AS1	3.20275	-1.51002	4.94984	6.85365e-05	0.00247089	1.48145
CYP4F35P	3.17852	1.44907	4.98615	6.29167e-05	0.00233858	1.56614
SUN3	3.1351	2.81603	10.346	1.13077e-09	3.98873e-07	12.384
ENSG00000267150	3.12507	-0.647973	6.05257	5.37633e-06	0.000355589	4.00846
SENCR	3.09706	-1.12921	4.98956	6.24144e-05	0.00232953	1.57407
FGF1	3.02687	4.24006	8.11549	6.81785e-08	1.11503e-05	8.34882
ENSG00000275216	3.01506	3.40301	8.37764	4.07568e-08	7.53733e-06	8.85823
STAT6	3.00065	2.8101	12.3554	4.5784e-11	2.88438e-08	15.4875
LINC02780	2.99811	-0.702579	5.94865	6.79679e-06	0.000427532	3.77529
HECW2-AS1	2.98904	-3.03584	4.19524	0.000411639	0.00902946	-0.286003
TTC9	2.95995	0.257187	4.33991	0.000291517	0.00710183	0.0528714
ENSG00000250284	2.95216	-0.234638	7.51194	2.30792e-07	2.98784e-05	7.13924
KRT34	2.94558	-0.219494	5.37619	2.52629e-05	0.00115691	2.47074
GAS6	2.92768	5.09943	8.68677	2.24771e-08	4.70191e-06	9.4466
SPAG6	2.91728	-1.61854	5.82409	9.01685e-06	0.000534406	3.49424
SLITRK3	2.89366	-2.5886	4.91237	7.48699e-05	0.00262556	1.39398
TNIP3	2.88569	-2.49885	3.31948	0.00327643	0.0391387	-2.30246
GHDC	2.87026	2.42938	7.07724	5.72524e-07	5.95358e-05	6.23642
ANKRD1	2.86632	7.43898	3.43639	0.00249226	0.0324661	-2.03915
CALHM4	2.84714	2.12925	4.54522	0.000178759	0.00505641	0.534364
ENSG00000267251	2.82977	-2.03207	6.04486	5.4704e-06	0.000360486	3.99121
MSX2	2.81394	-3.08045	4.29484	0.000324592	0.00766312	-0.0527559
CPA4	2.8021	-0.598824	5.56353	1.63775e-05	0.000834648	2.90112
PLEKHG7	2.77269	0.462483	3.41895	0.00259635	0.0332815	-2.0786
LINC01094	2.76999	-1.07767	5.3368	2.7685e-05	0.00123981	2.37988
SFTA1P	2.76642	4.94593	7.10588	5.38836e-07	5.70215e-05	6.29671
NMU	2.75735	1.89327	6.01744	5.81886e-06	0.000376551	3.92979
DMKN	2.75466	0.729769	3.7808	0.0011047	0.0185735	-1.2508
WNT7B	2.74197	0.27254	3.86175	0.00091137	0.0160577	-1.06341
HTRA3	2.7339	-1.596	3.30192	0.00341337	0.0400303	-2.34178
MGLL	2.73288	6.38337	7.2476	3.99802e-07	4.55218e-05	6.59337
LRRK1	2.71759	-1.22003	4.15848	0.00044937	0.00963547	-0.372012
ERC2	2.70731	1.24461	13.2397	1.26417e-11	9.476e-09	16.7148
AOX1	2.68322	4.65705	7.00838	6.62679e-07	6.58652e-05	6.09102
B3GALT5	2.67735	-0.638038	3.96628	0.000710597	0.0135828	-0.820541
ZNF404	2.67272	6.14075	4.68694	0.000127652	0.00395941	0.866585
HKDC1	2.65712	-0.850219	4.88876	7.91618e-05	0.00274397	1.33883
KRT8P10	2.65454	-1.26047	4.77939	0.000102528	0.00333312	1.08309
PPP1R14A	2.63731	1.82497	4.46112	0.00021838	0.00586367	0.33711
MISP	2.6343	1.63645	4.42412	0.000238504	0.00621216	0.250323
NMNAT3	2.60154	0.276924	7.94918	9.49432e-08	1.43068e-05	8.02063
ENSG00000284703	2.59414	-2.40868	7.77715	1.34249e-07	1.91677e-05	7.67706
PPARG	2.58987	0.414012	4.15351	0.000454725	0.00972988	-0.383627
MYO5BP3	2.55063	-1.58197	5.11748	4.62091e-05	0.00185145	1.87185
CDA	2.54176	-1.78578	4.67791	0.000130418	0.00403824	0.845422
CAMK2N1	2.53872	1.08319	8.59055	2.70154e-08	5.34073e-06	9.26488
LINC00911	2.51482	-0.994592	3.7383	0.00122196	0.0198761	-1.34892
PDLIM1	2.50176	3.48691	3.93111	0.000772687	0.0144048	-0.902355
GAS6-AS1	2.49836	3.03994	9.14125	9.5823e-09	2.46265e-06	10.2876
RGS4	2.49603	-1.31728	3.86604	0.000902099	0.0160363	-1.05344
HIKESHIP1	2.46254	-1.91256	5.28681	3.11022e-05	0.00134826	2.2644
KRT18P17	2.43777	-2.11526	3.74439	0.00120443	0.0197128	-1.33488
ENSG00000260328	2.4299	-0.0392393	10.4726	9.12219e-10	3.49166e-07	12.5936
CREB3L1	2.3974	4.035	6.77734	1.08739e-06	0.000100836	5.59847
C19orf33	2.38066	2.5477	3.50098	0.00214125	0.0291165	-1.89263
COL16A1	2.37893	1.95148	5.29306	3.06527e-05	0.00133521	2.27885
ENSG00000287916	2.35412	4.31681	3.5821	0.00176856	0.0255348	-1.70766
EBF3	2.34268	0.955032	6.13879	4.43021e-06	0.000313502	4.201
TM4SF19	2.33169	-1.35367	5.20719	3.7455e-05	0.00155616	2.08006
TCP11	2.32887	2.05547	7.39253	2.95468e-07	3.66584e-05	6.89385
KCNK13	2.32847	0.379515	6.62372	1.51735e-06	0.00013187	5.26702
POU3F3	2.29834	-2.68813	5.50331	1.88189e-05	0.000917484	2.76311
CD274	2.29616	2.33823	4.34498	0.000288016	0.00705914	0.0647527
G2E3-AS1	2.29615	-1.45951	6.05352	5.36484e-06	0.000355589	4.01059
ENSG00000228997	2.28953	-0.779001	6.32669	2.91471e-06	0.000227162	4.61752
LINC02057	2.28006	-0.666381	6.76431	1.11844e-06	0.000102344	5.57046
VSTM1	2.27788	3.44277	3.52499	0.00202355	0.0278955	-1.83799
SALL3	2.27375	6.66648	4.37087	0.000270774	0.006775	0.125459
RPS2P32	2.26477	1.07226	4.16036	0.000447359	0.00960381	-0.367616
COL4A6	2.26347	-0.270431	5.54887	1.69405e-05	0.000850706	2.86755
ENSG00000247810	2.25885	-2.10633	4.03366	0.000605179	0.0120834	-0.663548
ARL14EPL	2.2464	-1.34267	3.39006	0.00277817	0.0348773	-2.1438
KIF26A	2.24124	2.00758	8.48137	3.33329e-08	6.3122e-06	9.05714
SCUBE3	2.23782	-0.768376	5.32767	2.82793e-05	0.00125306	2.35881
ALS2CL	2.17052	1.72506	4.85236	8.62708e-05	0.00290639	1.25377
ENSG00000277806	2.14244	1.19942	5.6905	1.22335e-05	0.000676053	3.19098
FLI1	2.13857	0.16051	4.29236	0.000326515	0.00768849	-0.0585588
CCNA1	2.13428	2.55857	5.84499	8.59817e-06	0.000519064	3.54151
TMSB15A	2.1215	-0.821518	4.36317	0.000275791	0.006834	0.107403
ENSG00000278917	2.11479	3.26182	4.59381	0.000159254	0.00468135	0.648294
NRN1	2.09986	4.69457	11.3294	2.23448e-10	1.11662e-07	13.9606
LYPD5	2.08635	0.296733	3.87882	0.000875099	0.015743	-1.02381
NDUFB4P12	2.07429	-0.762639	3.59147	0.00172986	0.0252394	-1.68624
NKX2-2-AS1	2.04617	-0.210754	5.33929	2.75253e-05	0.00123795	2.38562
ZC4H2	2.0358	3.36005	11.9049	9.06762e-11	4.94322e-08	14.8312
SAMD9L	2.03082	1.25672	3.39915	0.00271965	0.0343617	-2.1233
PID1	2.02542	-2.49877	3.57262	0.00180856	0.0259252	-1.72932
MARCHF3	2.02363	3.61054	6.4937	2.01646e-06	0.000167171	4.98408
LINC00705	2.01236	0.62123	4.60899	0.000153611	0.00454266	0.683886
LINC01186	1.99324	1.18019	4.86824	8.3094e-05	0.00284194	1.29088
RPL13AP20	1.97705	2.97695	4.02278	0.000621076	0.012346	-0.688912
SERINC2	1.97304	0.724929	3.68082	0.00140031	0.0218488	-1.48129
NKX2-2	1.96674	0.778651	5.37601	2.52732e-05	0.00115691	2.47034
LIPE	1.96391	3.3961	5.09803	4.83665e-05	0.00191655	1.82664
NR2F1-AS1	1.96142	0.308618	6.05549	5.34109e-06	0.000355589	4.015
SPEF2	1.95973	-1.41315	3.79543	0.00106697	0.0180402	-1.21697
GPSM3	1.94025	3.09412	3.92657	0.00078108	0.0145012	-0.912903
ENSG00000267279	1.93515	3.38365	5.97571	6.39344e-06	0.000404993	3.83613
DGCR11	1.92327	0.721118	5.64501	1.35787e-05	0.000735785	3.08731
LILRB3	1.91793	-1.05007	3.62423	0.00160099	0.0238426	-1.61122
YBX2	1.91654	4.53622	4.3679	0.000272695	0.00678532	0.118506
ENSG00000259727	1.90921	0.0996273	6.76336	1.12072e-06	0.000102344	5.56843
GBP1	1.89923	1.50546	4.5101	0.000194343	0.00533279	0.451983
ENSG00000287287	1.89828	1.35844	4.62277	0.00014866	0.00445734	0.716204
RPRM	1.89026	1.45074	4.81219	9.48703e-05	0.00316059	1.15982
ENSG00000267069	1.88279	0.336268	4.44408	0.000227423	0.00601668	0.297156
ENSG00000287016	1.87245	0.615921	5.9794	6.34037e-06	0.000403051	3.84442
LINC00702	1.86912	0.550017	5.90031	7.58326e-06	0.000468807	3.6664
LINC01271	1.86843	-0.638112	3.25893	0.00377257	0.0430092	-2.43777
ZNF283	1.86288	6.32476	3.44452	0.00244515	0.0320848	-2.02075
MIR7111	1.85514	-1.47548	3.43349	0.00250927	0.0326168	-2.04571
GPRC5A	1.84982	6.94801	6.27936	3.23758e-06	0.000246797	4.513
SEMA7A	1.84923	2.43341	5.63845	1.37849e-05	0.000741697	3.07233
FAM189A2	1.83922	0.499936	4.60632	0.000154587	0.00455906	0.677634
A1CF	1.832	-1.41869	4.94391	6.95027e-05	0.00248579	1.46759
PLAC1	1.82948	0.420883	3.87638	0.00088019	0.015807	-1.02947
GATA2-AS1	1.82589	2.21433	8.21684	5.58204e-08	9.5639e-06	8.54691
SERTAD4-AS1	1.81802	2.40609	4.75371	0.00010896	0.00350661	1.02296
CD163L1	1.81285	4.98	5.8313	8.8702e-06	0.00052943	3.51054
GALE	1.81256	5.92895	4.87107	8.25395e-05	0.00283917	1.2975
ENSG00000280287	1.81219	0.922261	5.24629	3.41858e-05	0.00144408	2.17063
NFASC	1.81007	2.14373	3.49067	0.00219383	0.0296634	-1.91606
SMIM10	1.80923	2.24091	8.23052	5.43401e-08	9.49104e-06	8.57352
TFEB	1.8077	1.03729	3.58691	0.00174859	0.0253238	-1.69667
HIF1A-AS3	1.8064	0.882929	4.01959	0.000625821	0.0124129	-0.696355
TM4SF19-AS1	1.80358	0.820763	4.42095	0.00024031	0.00624737	0.242897
WNT5B	1.80234	6.13353	4.63831	0.000143273	0.00433189	0.752631
ZNF45-AS1	1.80131	1.69367	3.32954	0.00320037	0.0385373	-2.27989
ENSG00000272599	1.79475	2.17326	7.85599	1.14485e-07	1.68818e-05	7.83503
KRT15	1.79416	3.31762	5.58981	1.54157e-05	0.000801526	2.96124
ENSG00000248161	1.79193	1.32377	4.51216	0.000193392	0.00532791	0.456816
PSTPIP2	1.78843	1.41634	4.40449	0.000249924	0.00642306	0.20429
SUSD4	1.78818	-0.237401	4.35998	0.000277894	0.00686718	0.0999336
NLRP3	1.78758	1.5827	3.3111	0.00334105	0.0395591	-2.32122
LINC02575	1.78011	2.01167	8.80798	1.78597e-08	4.09876e-06	9.67366
SPECC1	1.77848	5.26784	12.0099	7.71967e-11	4.62923e-08	14.986
IFITM3P2	1.77438	0.395991	4.73302	0.000114435	0.00361684	0.97453
PLEK2	1.77277	5.35772	5.04014	5.54116e-05	0.00212549	1.69192
ENSG00000272159	1.77197	4.21765	5.50456	1.87644e-05	0.000917484	2.76599
TIMM8AP1	1.77159	-0.636464	3.32518	0.00323311	0.0387758	-2.28967
LDB2	1.7676	0.634979	4.42483	0.000238099	0.00621216	0.251995
OR2W3	1.7638	1.33764	5.26169	3.29785e-05	0.00140589	2.2063
LINC00960	1.75753	-0.317724	6.78061	1.07975e-06	0.000100646	5.60549
LINC01270	1.75308	0.534562	4.25944	0.000353191	0.00811481	-0.135696
MOCOS	1.75071	3.87627	5.63358	1.39399e-05	0.000742227	3.06122
FOXP4-AS1	1.74599	0.351388	3.94109	0.000754533	0.0141692	-0.879141
COL4A5	1.74136	1.53283	3.21285	0.00419841	0.0464796	-2.54021
ENSG00000283403	1.73417	-1.27625	3.97562	0.000694959	0.0133572	-0.798797
C1QTNF2	1.73218	1.3292	3.56347	0.00184807	0.0262596	-1.75024
NTM	1.72814	4.91536	4.35099	0.000283916	0.00699677	0.0788511
TSHZ3	1.72475	1.32946	4.1645	0.000442959	0.00956279	-0.357925
LINC00513	1.72217	5.0189	4.39053	0.00025838	0.00656533	0.171552
CENPN-AS1	1.72141	2.8655	6.48453	2.05748e-06	0.000169789	4.96405
ENSG00000240399	1.71885	-0.773689	3.26102	0.00375424	0.0428818	-2.4331
DPF1	1.70903	5.40279	5.35697	2.64164e-05	0.00119405	2.42643
RNF128	1.7055	-0.156881	3.29331	0.00348248	0.0405425	-2.36102
LINC02993	1.69081	-1.13988	3.20486	0.00427687	0.0471451	-2.55793
PROSER2	1.68889	3.24611	4.94487	6.93446e-05	0.00248508	1.46984
ENSG00000226380	1.67312	4.02032	7.25793	3.91246e-07	4.48313e-05	6.61487
PRDX4	1.6709	7.15197	4.36899	0.000271987	0.00677706	0.121066
NR4A1AS	1.66237	1.9811	4.58703	0.00016184	0.00474187	0.632406
FOXG1-AS1	1.65359	-0.485623	4.00888	0.000641991	0.0126638	-0.721302
NAT1	1.65057	1.00024	4.43015	0.000235101	0.00615642	0.26447
ENSG00000284648	1.64342	-1.38502	3.34103	0.00311566	0.0379027	-2.25411
RNU6-8	1.63768	-0.815643	4.0068	0.000645188	0.0126834	-0.726159
ENSG00000276170	1.63386	3.09009	3.80942	0.0010321	0.0176329	-1.18462
ROBO2	1.62223	-0.983034	3.6869	0.00138031	0.0216352	-1.46732
CALCRL-AS1	1.62044	1.40288	5.40834	2.34458e-05	0.00108429	2.54483
LVRN	1.6197	4.05606	3.68827	0.00137584	0.0216197	-1.46417
ENSG00000276390	1.6088	-0.339662	3.45557	0.00238251	0.0314003	-1.99571
LINC02321	1.60877	2.32393	3.60604	0.00167134	0.0246119	-1.6529
PPP1R14B-AS1	1.60502	2.4414	3.38356	0.00282076	0.035224	-2.15845
CEBPD	1.60279	3.03781	5.25153	3.37703e-05	0.00143285	2.18276
ENTPD3-AS1	1.60279	1.19306	3.50427	0.00212473	0.0289494	-1.88514
RAB9B	1.59466	0.541813	4.83857	8.91299e-05	0.00298038	1.22153
SEMA3E	1.59418	2.8911	4.67579	0.000131075	0.00405163	0.840455
ANO4	1.58663	1.07213	5.79057	9.7324e-06	0.000567587	3.41832
DNAAF11	1.57995	1.44466	5.8044	9.43051e-06	0.000554428	3.44965
MPP1	1.57931	3.81465	9.40059	5.95999e-09	1.67532e-06	10.755
CIART	1.57767	2.10458	6.3276	2.90888e-06	0.000227162	4.61952
TPM1-AS	1.57697	3.10141	6.16532	4.17486e-06	0.000296861	4.26006
MYO5B	1.57544	4.37429	5.49563	1.91555e-05	0.000928861	2.7455
MIR17HG	1.57492	0.811866	4.51008	0.000194352	0.00533279	0.451937
TBX2	1.57471	2.95558	4.44654	0.000226098	0.00600861	0.302909
ZCCHC18	1.57432	-0.731267	4.44324	0.000227882	0.00601996	0.295172
TIMM8B	1.57156	6.02724	3.67204	0.00142973	0.022154	-1.50147
ATP2C2	1.56413	0.111587	7.34599	3.25503e-07	3.91212e-05	6.79767
ENSG00000270039	1.55643	-1.47473	3.93595	0.000763814	0.0142838	-0.891079
SHISAL2B	1.55197	-0.19341	3.71107	0.00130345	0.0208413	-1.41167
ENSG00000279148	1.55062	-1.44123	4.92736	7.22691e-05	0.00256286	1.42896
KRT8	1.55031	10.6398	4.49222	0.000202791	0.00551089	0.410059
SAT1	1.52352	5.32059	7.26084	3.88865e-07	4.48313e-05	6.62094
ENSG00000267655	1.5219	1.01809	3.82119	0.00100363	0.017311	-1.15738
ENSG00000257086	1.51916	1.89816	3.55365	0.00189134	0.0265822	-1.77264
ZNF503	1.5187	2.58673	7.20157	4.40364e-07	4.85137e-05	6.49733
GLRX	1.51603	5.08536	6.24905	3.46336e-06	0.000257462	4.44593
ENSG00000241255	1.51392	1.32209	3.571	0.00181551	0.0259624	-1.73303
RPL22L1	1.50615	5.734	4.76734	0.000105497	0.00340736	1.05488
SPIRE2	-1.50065	2.93528	-4.54839	0.000177419	0.00503434	0.541783
LAMP3	-1.50753	1.54675	-3.2159	0.00416891	0.0462669	-2.53346
AHNAK2	-1.50769	7.98834	-4.21386	0.000393753	0.00872997	-0.242417
ABCA2	-1.5142	2.8696	-3.83145	0.000979449	0.017008	-1.13362
S1PR5	-1.51728	0.961672	-3.24019	0.00394046	0.0445842	-2.4795
ABCB6	-1.51775	-1.33635	-3.90095	0.000830196	0.0152556	-0.972422
ALG1L7P	-1.51973	-1.26385	-3.81631	0.00101534	0.0174627	-1.16868
FAM131B	-1.52178	-2.2387	-3.30061	0.00342377	0.0401262	-2.3447
GRAMD4	-1.52704	1.93688	-5.74454	1.08107e-05	0.000609669	3.31387
ENSG00000274227	-1.52902	-0.832855	-4.57145	0.000167949	0.00483656	0.595866
PTN	-1.53559	-0.958357	-3.82408	0.000996766	0.017209	-1.15069
MAPK8IP3	-1.53872	4.72323	-6.17456	4.08946e-06	0.000291942	4.28062
OSBPL5	-1.54105	1.55861	-4.01569	0.000631658	0.0124981	-0.705434
ARC	-1.5417	-1.54602	-3.43384	0.00250719	0.0326134	-2.04491
F2RL1	-1.54395	5.31568	-3.56424	0.0018447	0.0262596	-1.74847
FN1	-1.54888	2.4915	-3.51086	0.00209203	0.028672	-1.87016
TLN2	-1.5538	3.3339	-5.44879	2.1348e-05	0.00100831	2.63789
CDON	-1.55417	1.42734	-3.76869	0.00113692	0.0189538	-1.27877
SH3PXD2B	-1.55503	3.87439	-6.22113	3.68568e-06	0.000270634	4.38404
L3MBTL1	-1.55952	0.919935	-5.29689	3.03807e-05	0.00132658	2.28769
GNG4	-1.56647	2.19442	-3.62329	0.00160456	0.023876	-1.61338
OLFM2	-1.57027	-1.7363	-3.61467	0.0016376	0.0243024	-1.63313
RAB38	-1.57544	-2.69971	-3.20773	0.00424861	0.0469487	-2.55158
MIR570	-1.58017	-1.66834	-3.19285	0.00439753	0.0480922	-2.58454
QRICH2	-1.58502	0.984136	-5.82343	9.03054e-06	0.000534406	3.49273
STC2	-1.60435	4.12664	-3.6946	0.00135535	0.0214448	-1.4496
ENSG00000279833	-1.60907	1.30805	-3.95729	0.000725978	0.0137622	-0.84146
ASIC1	-1.6115	2.71698	-4.33364	0.000295908	0.00719375	0.0381764
LINC02614	-1.61589	-1.15161	-3.29147	0.00349746	0.0406456	-2.36514
DLG3	-1.61653	0.698004	-4.70303	0.00012287	0.00382428	0.904286
SLC4A8	-1.61903	2.91114	-6.46098	2.1668e-06	0.000177185	4.91254
EDNRA	-1.62135	-0.46481	-3.50402	0.00212596	0.0289494	-1.88571
ENSG00000267372	-1.62302	1.67173	-5.06398	5.23925e-05	0.00203134	1.74742
SEPTIN3	-1.62826	1.07571	-4.79222	9.94607e-05	0.0032771	1.11311
APLP1	-1.63049	4.24547	-4.54964	0.000176891	0.00503434	0.54472
CATSPERE	-1.63257	-1.58859	-3.43313	0.00251136	0.0326204	-2.04651
SLC7A7	-1.63329	-1.3072	-3.77228	0.00112729	0.01883	-1.2705
LTBP2	-1.63477	4.24085	-4.51301	0.000193	0.00532527	0.458816
LINC00205	-1.63519	4.0488	-4.19733	0.000409593	0.00900328	-0.281116
MAST1	-1.63931	1.71306	-4.92609	7.24845e-05	0.00256286	1.42602
INHBC	-1.63967	-1.67682	-4.26622	0.000347519	0.0080389	-0.119799
ALDH5A1	-1.6406	3.60471	-5.63908	1.37648e-05	0.000741697	3.07378
ZMYND8	-1.64075	5.64965	-5.48182	1.97772e-05	0.000956431	2.71378
ENSG00000265417	-1.64109	0.74305	-3.78392	0.00109656	0.0184711	-1.2436
DCBLD2	-1.6466	6.79551	-4.34535	0.000287756	0.00705914	0.0656403
MATN1-AS1	-1.64811	-1.63829	-4.47467	0.000211444	0.00571152	0.368899
FIGNL1	-1.65359	2.00806	-3.48974	0.00219863	0.0296725	-1.91818
SALL2	-1.65664	0.318696	-4.61517	0.000151371	0.00450108	0.698379
PPP1R3F	-1.65928	-1.03856	-4.07348	0.000550357	0.0112255	-0.57062
C20orf204	-1.67423	0.161059	-5.07764	5.07374e-05	0.00198427	1.77922
AARD	-1.67474	0.317239	-4.15233	0.000456013	0.00973151	-0.386398
GUCY1B2	-1.67496	-1.12067	-3.69225	0.00136291	0.0215455	-1.455
PLCH1	-1.67599	0.750072	-4.36257	0.000276186	0.00683438	0.105994
DNAAF3-AS1	-1.67858	1.49295	-3.43137	0.00252178	0.0327087	-2.05051
ENSG00000227775	-1.67969	-0.567439	-3.4863	0.00221649	0.029824	-1.92599
HSPG2	-1.68191	5.94233	-5.55154	1.68364e-05	0.000850706	2.87367
PXDN	-1.68279	4.19918	-4.23128	0.000377729	0.00854666	-0.201641
AKAP5	-1.68511	0.90315	-3.68988	0.00137058	0.0216197	-1.46045
NRBP2	-1.69525	2.28868	-3.6534	0.00149425	0.022839	-1.5443
EOMES	-1.70037	0.217476	-5.78983	9.74899e-06	0.000567587	3.41663
ENSG00000286456	-1.70445	-1.00361	-3.22414	0.00408998	0.0457444	-2.51516
STC1	-1.70545	4.40509	-3.87627	0.000880415	0.015807	-1.02971
C10orf95	-1.70662	-0.38993	-5.32265	2.86119e-05	0.00126469	2.34721
OBSCN	-1.70829	0.902099	-5.63761	1.38115e-05	0.000741697	3.07042
SYT11	-1.71663	0.996817	-5.6687	1.28602e-05	0.000705353	3.14133
BARX2	-1.71665	0.271088	-4.24153	0.000368603	0.00839388	-0.177633
BEND4	-1.72158	3.73105	-3.64087	0.00153921	0.0232302	-1.57306
ABCD2	-1.73255	0.842769	-3.48661	0.00221487	0.029824	-1.92528
GPR153	-1.73539	-0.0639346	-4.54116	0.000180497	0.00508159	0.524829
SRRM2-AS1	-1.73683	-1.42902	-3.35076	0.00304565	0.0373132	-2.23225
ENSG00000260051	-1.73726	-1.20255	-3.65186	0.0014997	0.0229029	-1.54783
PRECSIT	-1.73844	-0.470311	-4.34323	0.000289215	0.0070675	0.0606666
EML6	-1.74478	1.24427	-3.9944	0.000664544	0.0129806	-0.755058
DPY19L2P2	-1.74784	1.78343	-4.11645	0.000496749	0.0103672	-0.470255
ENSG00000261578	-1.75377	-1.84287	-4.96218	6.65723e-05	0.00241947	1.51023
ENSG00000279382	-1.76019	1.11216	-4.78044	0.000102275	0.00333312	1.08553
SYP	-1.7608	0.878273	-5.46816	2.04121e-05	0.000979237	2.6824
PTK2B	-1.76346	-0.390872	-4.6228	0.000148652	0.00445734	0.716261
RNF182	-1.76537	1.91866	-3.71075	0.00130446	0.0208413	-1.41242
ABCD1	-1.76971	1.87765	-4.21314	0.000394431	0.00872997	-0.244107
FHL1	-1.77751	4.27229	-4.10051	0.000516	0.0106551	-0.507499
KIAA0319	-1.78044	1.5348	-5.63341	1.39451e-05	0.000742227	3.06085
C2orf81	-1.78447	-1.13577	-4.63363	0.000144874	0.00435832	0.741666
EGR1	-1.7881	1.92344	-3.41078	0.00264651	0.0337186	-2.09704
TUBB4A	-1.78838	-0.530912	-3.51763	0.00205894	0.0283616	-1.85475
CNTNAP1	-1.78998	3.94536	-5.47536	2.00746e-05	0.000968209	2.69896
PHYHIPL	-1.7905	0.291632	-4.10473	0.00051083	0.0105996	-0.497635
ICOSLG	-1.79175	-0.803858	-3.51451	0.00207412	0.0285271	-1.86185
POU2F2-AS1	-1.79311	-0.902449	-3.28298	0.00356733	0.0411651	-2.38412
BSN	-1.79447	0.209475	-3.91114	0.000810301	0.0149664	-0.948753
IFFO1	-1.79726	2.21482	-5.90478	7.50668e-06	0.000465673	3.6765
FAM201A	-1.79799	1.45345	-6.01884	5.80057e-06	0.000376551	3.93292
BST1	-1.7983	0.0185949	-6.47884	2.08334e-06	0.000171138	4.95162
ADAMTSL4	-1.79981	1.58089	-4.14814	0.000460589	0.00978276	-0.396187
DNAH1	-1.80036	0.615268	-4.9825	6.34612e-05	0.00234911	1.55761
NPIPB11	-1.80452	0.300837	-4.26139	0.000351551	0.00808748	-0.131128
ZG16B	-1.80472	-1.8243	-3.96604	0.000711001	0.0135828	-0.821095
PCDHB11	-1.80698	-0.123748	-4.48924	0.000204233	0.00554171	0.403078
C13orf46	-1.80859	-0.788461	-3.55535	0.0018838	0.02658	-1.76877
TNIK	-1.80993	3.26332	-5.03641	5.58997e-05	0.00213511	1.68324
TEF	-1.81054	1.76369	-6.50149	1.98227e-06	0.000165098	5.0011
ARRB1	-1.81108	2.38463	-4.26866	0.00034551	0.0080203	-0.114105
TNFRSF9	-1.81518	0.281112	-4.63928	0.000142943	0.00432919	0.754906
DTX3	-1.81619	1.25904	-3.46348	0.00233862	0.0310035	-1.97777
MORN3	-1.82528	-1.63652	-3.61155	0.00164971	0.0243864	-1.64027
ENSG00000282885	-1.82991	-2.15	-3.38942	0.00278234	0.0349054	-2.14525
TMEM169	-1.83114	-0.537939	-6.40126	2.47153e-06	0.000197612	4.78162
LHX6	-1.83313	-1.22506	-5.43936	2.18193e-05	0.00102488	2.61621
LINC02606	-1.83562	-1.86366	-3.29887	0.00343769	0.0401547	-2.3486
ADAM8	-1.83778	0.328255	-4.75568	0.000108451	0.00349648	1.02759
CARMIL1	-1.84224	3.22979	-3.89302	0.000846013	0.0153591	-0.990836
ITGAM	-1.84472	1.9806	-8.73549	2.0488e-08	4.44071e-06	9.53811
CEL	-1.85232	-0.901096	-4.22833	0.000380397	0.00857562	-0.208551
NF1P8	-1.85249	-1.78169	-3.89257	0.000846929	0.0153591	-0.991892
EFNB3	-1.8564	0.879807	-4.19047	0.00041635	0.00910102	-0.297167
PIM2	-1.8614	3.55918	-7.50439	2.34411e-07	2.99938e-05	7.12378
FGF5	-1.86188	4.57517	-5.69893	1.19996e-05	0.000668337	3.21017
KLLN	-1.86235	-1.59484	-4.04242	0.000592664	0.0118863	-0.643105
RASGEF1A	-1.86702	1.18439	-5.73297	1.11005e-05	0.000622111	3.28758
ENSG00000231305	-1.86885	-1.09138	-6.13743	4.44375e-06	0.000313502	4.19796
RNF157	-1.86894	3.74244	-5.87557	8.02095e-06	0.000489142	3.61061
ZNF217	-1.86967	4.80794	-3.25995	0.00376361	0.0429343	-2.43549
FAM78A	-1.87887	0.48878	-7.51614	2.28803e-07	2.98784e-05	7.14783
RAB11FIP4	-1.87991	-0.926852	-3.76835	0.00113786	0.0189538	-1.27958
RAP1GAP	-1.88444	0.126951	-3.99192	0.000668478	0.0130292	-0.760828
ZIC1	-1.88622	0.942195	-4.87288	8.21881e-05	0.00283721	1.30172
APOBEC3F	-1.88647	1.5326	-5.45177	2.12011e-05	0.00100635	2.64475
ITGB7	-1.88673	-0.881078	-4.26453	0.000348925	0.00804306	-0.123764
H4-16	-1.892	-1.76029	-5.14371	4.34543e-05	0.00176022	1.93277
A2M-AS1	-1.89717	-0.254082	-4.38772	0.000260111	0.00657218	0.164984
AIF1L	-1.89834	3.092	-7.55063	2.13125e-07	2.84009e-05	7.21831
RNF212	-1.90686	1.21929	-7.32843	3.37633e-07	3.99607e-05	6.76132
ENSG00000286681	-1.90728	-1.3356	-4.70506	0.00012228	0.00381251	0.909039
CRYZL2P	-1.90908	0.34422	-6.40257	2.46438e-06	0.000197612	4.7845
ACACB	-1.90964	1.89686	-6.68179	1.33731e-06	0.000117357	5.39267
CLDN4	-1.90965	0.395015	-3.69494	0.00135424	0.0214448	-1.4488
ASIC3	-1.91225	1.0308	-4.42393	0.00023861	0.00621216	0.249884
PTP4A3	-1.91371	2.51398	-3.59369	0.00172079	0.0251274	-1.68114
C1orf167	-1.91739	0.737358	-5.2272	3.57441e-05	0.00149543	2.12643
SEMA4B	-1.91799	4.7508	-4.9486	6.87378e-05	0.00247318	1.47854
THBS3-AS1	-1.92342	2.27311	-5.13852	4.39858e-05	0.00177025	1.92072
BTNL9	-1.92453	2.0515	-4.91681	7.40905e-05	0.00261351	1.40433
OCA2	-1.92938	-1.30902	-3.24132	0.00393007	0.0445226	-2.47697
PIANP	-1.93208	0.131928	-5.83044	8.8876e-06	0.00052943	3.50859
TMEM198B	-1.93441	2.07883	-7.50301	2.35082e-07	2.99938e-05	7.12094
EID3	-1.93898	-0.180344	-6.5463	1.79682e-06	0.000153198	5.09882
ENSG00000253636	-1.93921	-2.02633	-3.21632	0.00416482	0.0462669	-2.53252
TLCD2	-1.94798	1.10527	-4.44527	0.000226784	0.00601668	0.299927
ENSG00000269737	-1.95349	-1.99071	-3.31164	0.00333687	0.0395457	-2.32002
ENSG00000261786	-1.95673	-0.839787	-4.07175	0.000552629	0.0112591	-0.574653
LINC01341	-1.96202	-1.45467	-4.112	0.000502052	0.0104657	-0.480656
CDC42BPG	-1.96218	-1.17387	-3.63336	0.00156681	0.0234639	-1.59029
FBXO41	-1.96962	3.23842	-9.75156	3.17596e-09	9.85095e-07	11.3732
ZNF618	-1.96999	0.41534	-3.87271	0.000887903	0.0159097	-1.03797
MAMSTR	-1.98455	0.230874	-3.5728	0.00180781	0.0259252	-1.72892
ABCA17P	-1.98478	-1.10664	-4.59905	0.000157283	0.00463098	0.660578
FAM83H	-1.98694	0.594506	-5.36979	2.56409e-05	0.0011678	2.456
GIPR	-1.99424	0.270882	-3.49332	0.00218021	0.0295124	-1.91005
RNF157-AS1	-1.9964	2.55102	-5.45374	2.11046e-05	0.00100442	2.64928
EGLN3	-2.00132	-0.381615	-4.52813	0.00018618	0.00518545	0.49427
H6PD	-2.00281	2.86773	-4.40481	0.000249729	0.00642306	0.20506
NOVA2	-2.01173	0.115895	-4.43728	0.000231142	0.0060882	0.281189
ENSG00000277117	-2.01583	-0.742265	-5.57559	1.59288e-05	0.00082062	2.92871
CCDC184	-2.01801	-1.05392	-4.38829	0.00025976	0.00657218	0.166309
KCND1	-2.02188	1.96969	-5.16955	4.09025e-05	0.0016877	1.99276
TM4SF18	-2.02357	4.32243	-6.80515	1.02409e-06	9.59548e-05	5.65813
ERBB3	-2.02635	1.73944	-5.78539	9.84819e-06	0.000571513	3.40656
SOX2	-2.02688	0.0844231	-3.49664	0.00216325	0.0293048	-1.9025
SDC3	-2.03711	3.86151	-6.37947	2.59339e-06	0.000206439	4.73373
TRERF1	-2.03804	3.04104	-7.94247	9.62271e-08	1.43068e-05	8.00731
FAM86FP	-2.04709	-1.00868	-4.26778	0.000346229	0.00802662	-0.116146
COMP	-2.05676	-2.15878	-3.39839	0.00272447	0.0343617	-2.125
CELSR1	-2.0636	3.45586	-7.23248	4.12685e-07	4.61131e-05	6.56185
C1orf162	-2.06948	-2.11	-3.20053	0.00432002	0.0475044	-2.56753
TNS3	-2.07388	2.48389	-5.54299	1.71716e-05	0.000858104	2.85409
PCSK5	-2.07547	-0.900016	-3.72176	0.00127085	0.0203629	-1.38706
CBS	-2.07709	1.20936	-3.33212	0.00318121	0.0383579	-2.27412
SLC26A1	-2.07769	-0.0594409	-4.40327	0.000250649	0.00642628	0.201443
DOCK4	-2.08674	1.33008	-3.17508	0.00458206	0.04958	-2.62383
RIMS3	-2.08805	2.45893	-7.35382	3.20235e-07	3.91212e-05	6.81388
UPK1A	-2.08809	-1.53042	-3.37531	0.00287578	0.0357041	-2.17704
THBS3	-2.09079	3.43822	-5.52023	1.80975e-05	0.000894433	2.80193
PNPLA3	-2.09127	-0.642719	-5.5807	1.57425e-05	0.00081616	2.9404
PAQR6	-2.09217	0.908475	-4.16096	0.00044672	0.00960154	-0.366214
IL18R1	-2.09291	-0.0546746	-3.31302	0.00332619	0.039445	-2.31694
KIRREL2	-2.09362	2.0504	-7.02606	6.38213e-07	6.45025e-05	6.12843
JAG1	-2.0959	1.779	-4.61594	0.000151095	0.00450032	0.700179
CACNG8	-2.1052	1.52638	-3.7662	0.00114368	0.0190155	-1.28454
PGAM2	-2.1075	-0.847994	-4.01533	0.0006322	0.0124981	-0.706273
LINC01301	-2.10924	-1.95325	-4.78003	0.000102373	0.00333312	1.08458
RAB20	-2.11013	-0.169042	-5.222	3.61805e-05	0.00151018	2.11439
GCNT1	-2.11451	1.3549	-4.58318	0.000163328	0.00477767	0.623384
PMEPA1	-2.11946	-1.56409	-3.40881	0.00265876	0.0338268	-2.10149
SLC12A7	-2.12	1.66246	-7.85171	1.15476e-07	1.68896e-05	7.82648
ENSG00000228549	-2.1228	-1.29829	-4.23027	0.000378637	0.00854666	-0.204
CCN3	-2.13209	1.66201	-3.94517	0.000747242	0.0140616	-0.869658
CA8	-2.13681	1.12365	-3.72237	0.001269	0.0203629	-1.38564
ELFN2	-2.13715	-0.635512	-4.13122	0.000479559	0.0101022	-0.435745
ENSG00000286623	-2.13716	-0.0209013	-3.53433	0.0019795	0.0274989	-1.8167
ATG9B	-2.13884	-2.28291	-3.49019	0.00219631	0.0296634	-1.91716
CHDH	-2.14236	-0.37337	-5.77419	1.01029e-05	0.000582535	3.38118
ZNF425	-2.15139	-0.322134	-7.83269	1.1999e-07	1.74082e-05	7.78845
PRORSD1P	-2.159	-1.82985	-3.89615	0.000839745	0.0153591	-0.983581
IFT140	-2.1596	3.34544	-7.46935	2.51994e-07	3.19252e-05	7.05195
CCDC92B	-2.16103	-1.4006	-5.8384	8.72814e-06	0.000525148	3.52659
SEL1L3	-2.16281	3.54464	-4.22632	0.000382228	0.00859536	-0.213264
ENSG00000256894	-2.16287	-2.3837	-3.27449	0.00363846	0.0417448	-2.40306
SYT5	-2.17291	-1.42322	-3.79734	0.00106216	0.0180267	-1.21257
CERS4	-2.18369	-0.413767	-3.98925	0.000672743	0.0130698	-0.767045
FCHO1	-2.18946	-0.467106	-4.21304	0.000394523	0.00872997	-0.244334
ENSG00000259370	-2.19035	-1.03756	-3.5891	0.00173955	0.0252838	-1.69165
ABCA3	-2.19057	4.98622	-9.425	5.70192e-09	1.62822e-06	10.7985
ENSG00000274904	-2.1935	0.112561	-6.03915	5.54113e-06	0.000363814	3.97843
ZFHX2	-2.19434	1.05551	-5.65809	1.3177e-05	0.000718347	3.11715
PDZD4	-2.19455	-1.59	-3.86352	0.00090753	0.0160536	-1.05929
KCNAB2	-2.19488	-0.102553	-5.33649	2.77046e-05	0.00123981	2.37918
TGFB1I1	-2.19532	0.716031	-4.02106	0.000623624	0.012383	-0.692915
PRAG1	-2.19704	0.272386	-6.21483	3.73782e-06	0.000272241	4.37006
TMEM38A	-2.19872	0.411479	-6.26048	3.37641e-06	0.000252823	4.47123
ENSG00000259436	-2.20175	0.047575	-6.0876	4.96913e-06	0.000341612	4.0868
GABRD	-2.21369	-1.72433	-3.39817	0.00272591	0.0343617	-2.12551
DNAH10	-2.21685	-1.86078	-3.62517	0.00159743	0.0238092	-1.60906
ENSG00000260279	-2.21751	-0.73798	-3.59457	0.00171724	0.025096	-1.67914
MYH16	-2.2276	-1.45503	-3.55958	0.00186509	0.0263989	-1.75911
ENSG00000264272	-2.23595	-0.642528	-5.00797	5.97672e-05	0.00225411	1.61699
ENSG00000258768	-2.2383	-1.38176	-3.73358	0.0012357	0.0200272	-1.3598
VWA5A	-2.23843	1.38316	-6.97991	7.04104e-07	6.92177e-05	6.03072
SCARA3	-2.24331	0.884756	-4.28097	0.00033551	0.00785915	-0.0852567
PATL2	-2.24396	-0.585245	-5.17047	4.08142e-05	0.0016877	1.99491
NYAP1	-2.24531	-1.68678	-4.17506	0.000431942	0.00936222	-0.333227
RASD2	-2.24545	-0.752041	-5.4568	2.09559e-05	0.00099999	2.6563
KIF5A	-2.25003	1.18456	-5.62746	1.41371e-05	0.000748022	3.04726
TMEM163	-2.25198	-0.431459	-5.27987	3.16097e-05	0.00135718	2.24835
SYNGR1	-2.25222	1.9229	-5.24268	3.44746e-05	0.00145245	2.16229
GATM	-2.2586	-0.688791	-4.56914	0.000168875	0.0048454	0.590444
SLIT3	-2.26443	-0.0102404	-4.71218	0.000120232	0.00376824	0.925721
IL1R1	-2.26663	1.20242	-4.86576	8.35824e-05	0.00285064	1.28508
ADCY1	-2.27171	-2.768	-4.3442	0.000288551	0.00706263	0.0629278
CHD5	-2.2731	-0.35931	-5.28051	3.15629e-05	0.00135718	2.24982
MKRN9P	-2.27535	-1.31489	-4.6696	0.000133013	0.00408346	0.825966
ENSG00000230064	-2.2803	-2.17952	-4.64279	0.000141758	0.00430782	0.763119
NEO1	-2.28236	1.92212	-3.73043	0.00124497	0.0200854	-1.36706
SYT12	-2.30129	-1.84764	-3.70128	0.00133408	0.0212076	-1.43423
ENSG00000234460	-2.30898	-1.8452	-3.17923	0.00453832	0.0492393	-2.61467
NOS3	-2.3111	-1.6777	-4.59261	0.000159709	0.00468705	0.645483
FBLN2	-2.31679	0.382195	-3.89351	0.000845031	0.0153591	-0.989702
CMTM1	-2.32419	-1.46594	-3.53704	0.0019669	0.027417	-1.81053
ULBP1	-2.33397	1.11054	-4.14841	0.000460294	0.00978276	-0.395559
MAPT	-2.33804	0.347489	-5.06443	5.23373e-05	0.00203134	1.74846
SLC6A16	-2.33924	-1.66592	-4.84173	8.84661e-05	0.00296656	1.22892
PRRT2	-2.34307	-0.622718	-4.04811	0.000584684	0.0117591	-0.62984
LINC01232	-2.34416	-1.36166	-5.55976	1.65205e-05	0.00083956	2.89248
MYOM1	-2.35507	-1.43339	-4.9815	6.36096e-05	0.00234977	1.55529
PIK3C2B	-2.36017	1.58894	-7.94387	9.59572e-08	1.43068e-05	8.0101
NRIP3-DT	-2.36145	-1.45904	-5.51891	1.81527e-05	0.000894702	2.7989
LRP1	-2.36499	2.57067	-4.15335	0.0004549	0.00972988	-0.384003
USP27X-DT	-2.36674	-0.731199	-4.10167	0.000514577	0.0106551	-0.504795
GAL3ST4	-2.37666	-1.0756	-6.73024	1.20396e-06	0.00010884	5.49717
RIMKLA	-2.37765	-0.491464	-4.74473	0.000111302	0.00355651	1.00196
CACNA1B	-2.38363	0.281901	-5.75103	1.06516e-05	0.000606402	3.3286
ENSG00000278330	-2.38452	-1.2898	-4.25211	0.000359419	0.00822639	-0.152861
TMEM37	-2.39999	-1.04692	-4.32137	0.000304693	0.00737562	0.0094169
GP1BA	-2.40814	-1.5578	-3.50779	0.0021072	0.0287404	-1.87714
CYP1B1-AS1	-2.40889	-0.739181	-3.23204	0.00401567	0.0452132	-2.49761
CLIP3	-2.41217	4.20944	-5.15853	4.19717e-05	0.00172391	1.96718
NEBL	-2.415	-2.72224	-3.7782	0.00111155	0.0186537	-1.25681
SNAP25	-2.41952	0.51487	-4.40308	0.000250764	0.00642628	0.200989
LGI2	-2.42189	-0.222096	-4.98638	6.28828e-05	0.00233858	1.56667
GRK5	-2.42852	1.94652	-11.2135	2.69037e-10	1.24102e-07	13.7807
PKDREJ	-2.44464	-2.13107	-3.68913	0.00137303	0.0216197	-1.46218
DIXDC1	-2.44779	1.43247	-3.98671	0.000676836	0.013121	-0.772974
YPEL3	-2.45681	-1.379	-6.05397	5.35941e-06	0.000355589	4.0116
NPHS1	-2.45758	-1.64971	-5.601	1.50237e-05	0.000785258	2.98683
CCM2L	-2.48167	-2.04635	-3.59582	0.00171217	0.0250423	-1.67628
SLC1A3	-2.48906	0.917502	-4.44428	0.000227319	0.00601668	0.297607
COL13A1	-2.50158	-0.727085	-3.3992	0.00271934	0.0343617	-2.12319
TFR2	-2.51254	-1.36054	-7.59806	1.93356e-07	2.59588e-05	7.31496
LHX1	-2.51305	0.338147	-6.25908	3.38691e-06	0.000252823	4.46814
PDE4B	-2.51905	0.117217	-3.91464	0.000803575	0.0148728	-0.940618
IGSF3	-2.53854	2.09702	-6.81039	1.01258e-06	9.58757e-05	5.66937
PPFIA4	-2.54277	0.28216	-4.85773	8.51832e-05	0.00288596	1.26632
CLMN	-2.54841	1.65796	-4.46979	0.000213917	0.00576968	0.357444
TNC	-2.55784	1.31616	-3.93976	0.00075693	0.0141846	-0.882238
NAALAD2	-2.55809	-0.836221	-4.65126	0.000138934	0.00425072	0.78298
VGF	-2.56146	5.69548	-3.89286	0.00084633	0.0153591	-0.991201
NKD2	-2.56857	0.466187	-3.84295	0.000953023	0.0165972	-1.10697
RTN1	-2.56959	1.24471	-5.45803	2.08962e-05	0.000999792	2.65913
ENSG00000267640	-2.62252	-2.26723	-3.29933	0.00343398	0.0401547	-2.34756
KCNF1	-2.62605	-2.28831	-4.65043	0.000139208	0.00425186	0.781037
CDX2	-2.63049	-2.1117	-5.2645	3.27634e-05	0.00140003	2.21279
CNR1	-2.64963	-2.0127	-4.55096	0.000176336	0.00502739	0.547821
KHDRBS3	-2.65237	0.0898411	-5.36503	2.59261e-05	0.00117781	2.44502
GALNT6	-2.65697	2.33109	-7.73178	1.47188e-07	2.05264e-05	7.58576
SYT17	-2.66462	1.15389	-4.3644	0.000274979	0.00682328	0.110303
SSC5D	-2.68304	-1.92134	-4.04791	0.000584964	0.0117591	-0.630309
AFF3	-2.68384	-2.37142	-3.61065	0.00165323	0.0244184	-1.64234
NKX2-5	-2.6884	-1.4991	-4.10667	0.000508472	0.010575	-0.493103
TMEM229B	-2.69254	-0.888028	-5.14399	4.3425e-05	0.00176022	1.93344
ENSG00000286790	-2.69356	0.189736	-5.32062	2.8747e-05	0.00126754	2.34253
ENSG00000286282	-2.6972	-1.98379	-3.20015	0.00432386	0.0475175	-2.56838
PPP2R2C	-2.71756	0.783128	-9.31186	7.00475e-09	1.88083e-06	10.5961
NOTCH3	-2.72235	0.883796	-6.32441	2.9295e-06	0.000227162	4.61249
PFKFB1	-2.732	-2.34199	-4.71781	0.000118639	0.0037248	0.938895
FAM110B	-2.73841	-1.03315	-6.93119	7.81297e-07	7.55674e-05	5.92727
CICP14	-2.74621	-0.883183	-3.29808	0.00344406	0.0401547	-2.35037
TMEM108	-2.75828	-0.892989	-4.44243	0.00022832	0.00602268	0.293283
FBXO2	-2.75918	0.303652	-3.68316	0.00139259	0.021766	-1.47592
ABCA1	-2.77038	0.468979	-4.38013	0.000264865	0.00666421	0.147166
ZNF862	-2.77541	-1.01111	-4.69026	0.000126648	0.00393506	0.87438
PLEKHG1	-2.78329	-2.18677	-3.73754	0.00122417	0.0198942	-1.35069
DHRS3	-2.78516	-0.651452	-3.25276	0.00382706	0.0435752	-2.45152
ARX	-2.78868	-2.92112	-3.2538	0.0038178	0.0434973	-2.44919
ID2-AS1	-2.7896	-0.39878	-8.67622	2.29337e-08	4.74226e-06	9.42673
SLC16A2	-2.80015	1.59797	-5.02998	5.67511e-05	0.00215689	1.66827
SBK1	-2.81788	-0.340785	-6.68892	1.31675e-06	0.000116691	5.40808
ERRFI1	-2.83973	6.26135	-7.61436	1.87007e-07	2.54868e-05	7.34811
TTYH2	-2.84473	1.77969	-12.4131	4.20051e-11	2.79878e-08	15.57
CDCP1	-2.84575	5.36229	-4.9749	6.46065e-05	0.00237198	1.5399
ZNF793	-2.8583	2.06669	-6.82639	9.783e-07	9.31196e-05	5.70363
MXRA8	-2.86556	0.845964	-6.10122	4.81953e-06	0.000337367	4.11721
GNAZ	-2.86568	-0.0569977	-8.23315	5.40595e-08	9.49104e-06	8.57865
LIF-AS2	-2.86901	-2.5635	-3.96825	0.000707256	0.0135501	-0.815936
GPR132	-2.87021	-2.04038	-4.4465	0.000226116	0.00600861	0.30283
FER1L4	-2.89025	1.74543	-4.73243	0.000114597	0.00361684	0.973134
ATF7IP2	-2.95114	0.436002	-7.79787	1.28736e-07	1.85277e-05	7.71865
LAYN	-2.95853	1.77874	-10.4952	8.78062e-10	3.43399e-07	12.6308
LAPTM5	-2.96263	-1.91321	-3.43854	0.0024797	0.0323729	-2.03428
SPP1	-2.96282	2.62289	-6.41026	2.42291e-06	0.000195463	4.80139
NTN1	-2.96601	-1.64561	-3.45677	0.00237581	0.0313349	-1.99299
NYNRIN	-2.96938	-0.226678	-5.42053	2.27928e-05	0.0010576	2.57288
ARMCX4	-2.97701	-1.93535	-5.83179	8.8602e-06	0.00052943	3.51166
ENSG00000267992	-2.97843	-0.17326	-7.11166	5.32288e-07	5.66619e-05	6.30887
EMP2	-2.9788	1.74733	-6.96833	7.21712e-07	7.0563e-05	6.00616
SCNN1A	-2.98127	0.143516	-3.63419	0.00156372	0.0234623	-1.58838
LRRC56	-2.98509	-0.605084	-5.05162	5.39355e-05	0.00208219	1.71867
AMPH	-2.99195	0.396569	-8.90114	1.49854e-08	3.54721e-06	9.84682
KLF2P1	-2.99408	-2.64393	-3.23199	0.00401615	0.0452132	-2.49772
OR1F1	-3.0052	-1.90212	-3.76677	0.00114214	0.0190075	-1.28323
WDR87BP	-3.04302	-1.94907	-4.92593	7.25122e-05	0.00256286	1.42564
NEFM	-3.04918	-3.15655	-3.80191	0.00105067	0.0178671	-1.20199
PANX2	-3.05689	0.235839	-7.19953	4.4226e-07	4.85137e-05	6.49306
NLGN3	-3.05744	-0.709356	-9.14554	9.50659e-09	2.46265e-06	10.2955
IQCN	-3.06219	0.39023	-4.75111	0.000109632	0.00351564	1.01689
BMERB1	-3.06747	0.461585	-6.19378	3.91757e-06	0.000281317	4.32334
FBXO27	-3.07193	2.81411	-8.59993	2.65341e-08	5.30388e-06	9.28265
KCNJ12	-3.07784	-1.75627	-4.65592	0.000137406	0.00421114	0.793893
ADGRG1	-3.08561	-0.299236	-4.11894	0.000493815	0.0103419	-0.46445
LIF	-3.09814	2.49201	-10.3725	1.08082e-09	3.96814e-07	12.4281
ZNF521	-3.09822	-1.38481	-4.60976	0.000153329	0.00454266	0.685696
ENDOD1	-3.11067	1.87981	-6.69326	1.30441e-06	0.000116251	5.41745
EPHX2	-3.11136	-1.76973	-6.27151	3.29458e-06	0.000249031	4.49564
ANK1	-3.11969	0.433782	-3.30932	0.00335502	0.0396302	-2.32522
PCDHA11	-3.12214	-2.25076	-3.45782	0.00236995	0.0312812	-1.99061
C1RL	-3.12323	-2.77188	-4.34277	0.000289536	0.0070675	0.0595775
CEACAM19	-3.14955	0.591888	-8.65331	2.39583e-08	4.84281e-06	9.38355
CEND1	-3.15083	-1.65271	-4.29496	0.000324501	0.00766312	-0.0524785
GIPC3	-3.16257	-1.30109	-4.27981	0.00033644	0.00787069	-0.0879759
ARHGAP29	-3.18111	0.820317	-4.52723	0.000186579	0.00518787	0.492163
PREX1	-3.18712	0.764118	-5.54015	1.72845e-05	0.000861355	2.84758
SRPX	-3.19216	2.65663	-8.80386	1.7999e-08	4.09876e-06	9.66599
EFHD1	-3.19425	-1.11719	-5.89179	7.73106e-06	0.000476308	3.64721
LRATD2	-3.19477	0.822113	-6.45314	2.20448e-06	0.000179451	4.89539
TMTC1	-3.22646	-1.28679	-4.91066	7.51738e-05	0.00263108	1.38997
L1CAM	-3.23416	-2.69381	-4.5444	0.000179107	0.0050583	0.532447
LAMC3	-3.24144	-0.435898	-11.3846	2.04616e-10	1.05172e-07	14.0458
MAP1A	-3.25141	1.38076	-10.2286	1.38207e-09	4.78142e-07	12.1879
NTSR1	-3.25156	3.34526	-5.76183	1.0392e-05	0.00059539	3.35313
ACOX2	-3.26391	-0.605077	-5.74709	1.07479e-05	0.000608035	3.31966
ENSG00000287271	-3.27472	-0.159945	-8.18222	5.97581e-08	9.94485e-06	8.4794
SLC9A2	-3.27916	-0.308261	-4.2943	0.000325012	0.00766312	-0.0540239
SCARF1	-3.29059	0.860716	-14.5959	1.99547e-12	1.70946e-09	18.453
ID4	-3.31775	-2.72798	-4.13618	0.000473912	0.0100132	-0.424137
SFRP1	-3.3312	-1.03203	-5.02939	5.68297e-05	0.00215689	1.6669
ARL4C	-3.33328	1.68569	-4.39313	0.000256782	0.00654321	0.177655
ACAD9-DT	-3.34311	-2.1886	-5.66322	1.3023e-05	0.000712109	3.12883
BRSK2	-3.37734	-0.386819	-8.77471	1.90196e-08	4.26164e-06	9.61155
CDK20	-3.3786	0.828835	-8.72291	2.09835e-08	4.49396e-06	9.51451
ACRBP	-3.39683	-2.02944	-5.55057	1.68742e-05	0.000850706	2.87144
TNFRSF1B	-3.40083	-1.70462	-3.63895	0.00154621	0.0232788	-1.57746
ROR2	-3.41776	0.150473	-6.7428	1.17167e-06	0.000106456	5.52421
POTEF	-3.43663	-2.42976	-3.2489	0.0038615	0.0439117	-2.4601
IL7R	-3.43856	-0.850212	-4.50102	0.000198585	0.00542117	0.430705
SLCO5A1	-3.44693	-1.29072	-6.08944	4.94863e-06	0.000341612	4.09092
ZIC4	-3.49245	-3.10737	-4.27685	0.000338823	0.00790586	-0.0949067
GSTM2	-3.54676	-2.29352	-5.02349	5.76239e-05	0.00218243	1.65315
TSPAN7	-3.55146	-2.38131	-4.53249	0.000184259	0.00516327	0.504494
OPRL1	-3.5618	-0.485272	-5.621	1.43487e-05	0.00075699	3.0325
ENSG00000256013	-3.56425	-1.42151	-8.21971	5.55064e-08	9.5639e-06	8.5525
ADAMTS13	-3.56958	-0.904648	-5.10853	4.71899e-05	0.00188236	1.85104
FMN2	-3.58269	-2.58916	-6.19512	3.90589e-06	0.000281317	4.32631
PADI3	-3.60683	-2.67097	-3.43722	0.00248738	0.0324496	-2.03726
NEFL	-3.62156	0.476368	-4.50204	0.000198107	0.00541632	0.433084
FRMD3	-3.65009	-2.70236	-4.52258	0.000188653	0.00523746	0.481264
PTPRS	-3.65369	-2.85002	-7.31722	3.45623e-07	4.0639e-05	6.73808
FLRT2	-3.66027	-4.14006	-7.71447	1.52458e-07	2.10978e-05	7.55085
MBNL3	-3.67042	-0.347724	-4.80971	9.54272e-05	0.00317326	1.15403
ANKEF1	-3.70091	-1.19251	-9.02837	1.18133e-08	2.99325e-06	10.0814
ZDHHC11	-3.71905	-1.0085	-8.1806	5.99497e-08	9.94485e-06	8.47623
SHISA3	-3.74695	-3.67808	-6.90113	8.33225e-07	8.01589e-05	5.86328
CDK18	-3.75693	-1.35453	-6.9608	7.33411e-07	7.13193e-05	5.99017
ENSG00000225399	-3.7981	-3.91598	-7.40576	2.87465e-07	3.59132e-05	6.92113
LINC01460	-3.8326	-1.82116	-5.71516	1.1562e-05	0.000645965	3.24709
MYO10	-3.84423	-2.85489	-5.61456	1.45628e-05	0.000766035	3.01779
PADI2	-3.84784	-2.33749	-6.20834	3.79227e-06	0.000275092	4.35567
PELI2	-3.86637	-2.34639	-5.93579	6.99743e-06	0.000435584	3.74635
ENSG00000269896	-3.87998	-0.518593	-7.11277	5.31043e-07	5.66619e-05	6.3112
ENSG00000286999	-3.89831	-0.626886	-5.08178	5.0247e-05	0.00197367	1.78884
MYO15B	-3.90802	-2.2205	-3.44208	0.00245915	0.0322125	-2.02626
EYA1	-3.91383	-2.76517	-5.32999	2.81271e-05	0.00125035	2.36416
PCAT1	-3.91823	-2.2873	-4.48816	0.00020476	0.00554763	0.400541
TJP2	-3.92605	-2.53691	-4.11831	0.000494554	0.0103454	-0.465915
ENSG00000267886	-4.00871	-2.7454	-5.50399	1.87893e-05	0.000917484	2.76467
ALCAM	-4.04457	-2.16177	-8.17802	6.0255e-08	9.94485e-06	8.4712
LINC00511	-4.05669	-1.68332	-5.52666	1.78311e-05	0.000886137	2.81665
AP1G2	-4.12249	0.271125	-8.26533	5.07515e-08	9.0398e-06	8.64117
SESN3	-4.13181	-0.0722506	-7.34462	3.26434e-07	3.91212e-05	6.79484
PRUNE2	-4.25028	-1.01557	-7.60019	1.92514e-07	2.59588e-05	7.3193
AP1G2-AS1	-4.26619	-0.677155	-7.07049	5.80776e-07	6.00469e-05	6.22219
CTNND2	-4.28141	-2.72356	-8.07466	7.39283e-08	1.16664e-05	8.2686
IHO1	-4.31043	-3.27597	-8.19539	5.82278e-08	9.88224e-06	8.5051
SORCS2	-4.31189	-3.09903	-5.68273	1.24534e-05	0.000685125	3.17328
CACNA1A	-4.31959	-2.92135	-6.07396	5.12377e-06	0.000349154	4.05632
HSD17B8	-4.33375	1.65764	-8.07978	7.31809e-08	1.16664e-05	8.27867
DOCK2	-4.38826	-2.32962	-4.45658	0.000220754	0.00589224	0.326461
MGAT3	-4.42292	-2.80211	-5.4202	2.28099e-05	0.0010576	2.57213
VAT1L	-4.46415	-1.59959	-5.37414	2.53829e-05	0.00115898	2.46604
MIR2052HG	-4.47825	-4.05193	-7.27682	3.76072e-07	4.36486e-05	6.65418
TUB	-4.49368	-3.69412	-9.3229	6.8651e-09	1.87126e-06	10.6159
XDH	-4.53173	-2.83795	-6.99039	6.88551e-07	6.80606e-05	6.05294
ADGRB1	-4.60229	1.8154	-9.27086	7.55003e-09	1.99743e-06	10.5224
SMPD5	-4.63206	-2.84778	-6.35522	2.73623e-06	0.000216849	4.68039
FTCD	-4.66268	1.29518	-7.12449	5.18047e-07	5.61425e-05	6.33583
LINC01106	-4.72174	-2.32049	-6.54191	1.81418e-06	0.000153949	5.08926
ALPK2	-4.72345	0.0959023	-9.87621	2.54878e-09	8.18795e-07	11.5889
PPL	-4.75685	1.16778	-7.6765	1.64713e-07	2.26198e-05	7.47412
ARHGEF4	-4.77753	0.563608	-11.1501	2.9801e-10	1.30761e-07	13.6816
LPCAT2	-4.85494	-3.8534	-11.5388	1.60307e-10	8.48213e-08	14.2817
SOX4	-4.89228	-1.94782	-8.26558	5.07269e-08	9.0398e-06	8.64165
SUMO1P1	-4.93583	-4.20842	-9.3309	6.76556e-09	1.87126e-06	10.6303
ENSG00000284837	-4.96577	-4.24638	-10.9944	3.83688e-10	1.60524e-07	13.4364
MYRIP	-5.00658	-1.54345	-7.03009	6.32772e-07	6.45025e-05	6.13694
CYBA	-5.04901	3.28061	-6.69294	1.30532e-06	0.000116251	5.41675
SPATC1	-5.14773	-4.56368	-21.4648	1.03732e-15	2.6659e-12	25.1984
RPS6KA2	-5.18989	-4.54338	-15.68	5.03892e-13	5.03612e-10	19.7292
EHD3	-5.22949	0.750197	-18.9655	1.21901e-14	1.68692e-11	23.0789
ENSG00000232111	-5.29724	-4.60181	-43.275	6.33375e-22	1.13944e-17	35.2327
ENPP4	-5.45625	-4.51217	-20.3528	3.00099e-15	5.79813e-12	24.2953
NAT16	-5.5057	-2.16759	-6.50513	1.96651e-06	0.000164546	5.00904
FAM230C	-5.56032	-4.25486	-11.9683	8.22701e-11	4.63793e-08	14.9248
TNFRSF8	-5.56974	-2.65445	-8.07013	7.45962e-08	1.16694e-05	8.25969
NPAS2	-5.59342	-2.52515	-11.2973	2.35221e-10	1.14368e-07	13.9109
GAGE1	-5.60555	-2.58034	-6.77443	1.09425e-06	0.000100951	5.59222
NAP1L2	-5.6136	-2.08089	-7.16973	4.70886e-07	5.13409e-05	6.43071
TRIM71	-5.64503	-3.41213	-8.57086	2.80553e-08	5.48603e-06	9.22755
FBXL7	-5.74285	-1.03639	-10.036	1.92765e-09	6.42194e-07	11.8625
TMEM156	-5.78587	-0.992337	-8.95344	1.35861e-08	3.30289e-06	9.94352
MGMT	-5.83428	-3.19217	-10.7268	5.96024e-10	2.38277e-07	13.0082
ENSG00000267257	-5.86563	-1.81952	-6.28653	3.18638e-06	0.000243927	4.52886
GFRA1	-5.88051	-3.75546	-10.4379	9.67439e-10	3.62588e-07	12.5362
BMP7	-6.08222	-4.22844	-20.28	3.22298e-15	5.79813e-12	24.2341
CYP 20.00	-6.13979	-2.82514	-7.0232	6.42112e-07	6.45341e-05	6.12237
TMEM88	-6.18565	-2.05095	-10.3605	1.1032e-09	3.96932e-07	12.4081
SYCE1	-6.35352	-2.72279	-7.02632	6.37871e-07	6.45025e-05	6.12896
MAGI2-AS3	-6.52849	-3.39911	-10.0452	1.89708e-09	6.42194e-07	11.8781
FAIM	-6.58765	-1.12147	-10.727	5.95763e-10	2.38277e-07	13.0087
GALNT14	-6.59674	-2.87165	-12.3451	4.64963e-11	2.88438e-08	15.4727
MIR4527HG	-6.6856	-3.04934	-8.8624	1.61176e-08	3.76565e-06	9.77496
RIPK4	-6.69457	-4.36892	-32.1777	2.81917e-19	2.53585e-15	31.5034
ADPRH	-6.95338	-4.12682	-26.8344	1.14672e-17	6.87649e-14	28.8199
ZC3HAV1L	-6.97096	-4.22961	-15.3261	7.82511e-13	7.03869e-10	19.323
IL13RA2	-7.04333	-1.86678	-9.89059	2.48517e-09	8.12876e-07	11.6137
PIK3CG	-7.07492	-3.49437	-13.5611	8.05361e-12	6.29932e-09	17.1419
LDHAL6FP	-7.33421	-4.07117	-23.5476	1.61431e-16	7.26035e-13	26.737
NDRG1	-7.89806	-4.05513	-18.6337	1.72784e-14	2.22028e-11	22.772
RTL6	-8.17393	-3.8326	-21.705	8.30062e-16	2.4888e-12	25.3857
NETO1	-8.29583	-3.79149	-16.7376	1.41969e-13	1.59626e-10	20.8871
SOX9	-9.62769	-3.07195	-15.3686	7.41902e-13	7.02464e-10	19.3723

## Sheet: B10
	logFC	AveExpr	t	P.Value	adj.P.Val	B
CTPS2	7.13198	1.52964	19.674	5.89208e-15	1.17776e-11	23.7079
TRPM2	6.81133	0.489762	12.1662	6.08588e-11	3.4214e-08	15.2135
CRACR2A	6.70144	0.769537	17.8299	4.11847e-14	5.29224e-11	21.997
NR0B1	6.24495	1.85647	20.5781	2.40956e-15	7.22467e-12	24.4775
SLCO1B3	5.46768	-2.72833	6.95848	7.37056e-07	7.62048e-05	5.98625
TP53	5.45519	8.26434	16.3043	2.36519e-13	2.65936e-10	20.4193
KNOP1P5	5.37179	-1.9765	9.05827	1.11744e-08	2.72422e-06	10.1365
ENSG00000280202	5.28194	-1.50453	11.968	8.23019e-11	4.35474e-08	14.9235
LRRC4C	5.27699	1.6098	8.47322	3.38618e-08	6.94455e-06	9.04207
GAP43	5.2736	-0.401966	9.67912	3.61215e-09	1.06529e-06	11.247
PNPLA4	5.1486	-3.45231	6.66611	1.38364e-06	0.00012765	5.35988
ENSG00000234520	5.12036	-1.77697	8.76789	1.9267e-08	4.22699e-06	9.59919
ENSG00000286542	5.07586	-3.19528	6.73922	1.18078e-06	0.000111216	5.51758
ANXA3	4.99531	3.30529	20.819	1.91033e-15	6.87337e-12	24.6754
ARHGAP6	4.96664	-1.25923	8.10155	7.00875e-08	1.15677e-05	8.3221
MAGEA1	4.90282	0.521564	8.32853	4.48498e-08	8.31802e-06	8.76409
MAD1L1	4.89328	2.52675	8.96124	1.33893e-08	3.12822e-06	9.95824
AKR1C3	4.88863	-3.29168	6.96125	7.32708e-07	7.62048e-05	5.99213
ENSG00000279675	4.75541	-2.12855	6.52295	1.89113e-06	0.000164622	5.04906
GDNF	4.71265	0.934994	10.1989	1.45439e-09	5.13029e-07	12.1379
OR7E19P	4.6291	-0.368868	4.68704	0.00012762	0.00418195	0.868416
APCDD1L-DT	4.6218	-0.775252	6.80197	1.03112e-06	9.86691e-05	5.65238
HSPB8	4.56788	1.16818	8.4426	3.59286e-08	7.1028e-06	8.98349
SLFN12	4.47369	-1.97098	6.37457	2.62159e-06	0.000215354	4.72415
ENSG00000287149	4.37507	-0.690323	6.34201	2.81743e-06	0.000229346	4.65248
LRMDA	4.33728	-1.95499	10.37	1.08554e-09	4.15506e-07	12.4236
TMEM71	4.24749	-0.994836	5.21473	3.68005e-05	0.00162664	2.09901
ZNF22	4.24737	2.58695	18.744	1.53768e-14	2.30524e-11	22.87
CDYL2	3.99076	2.49685	10.9483	4.13714e-10	1.73086e-07	13.3628
ENSG00000233470	3.97576	-2.21841	7.95476	9.38887e-08	1.46364e-05	8.03239
RSPO4	3.95277	0.444747	8.94562	1.37864e-08	3.17971e-06	9.92942
LINC01515	3.91421	-1.74982	7.42453	2.7649e-07	3.41332e-05	6.96066
ENSG00000286913	3.83666	-1.16791	9.17114	9.06813e-09	2.29769e-06	10.3422
ENSG00000279497	3.78483	-1.61909	4.80147	9.73066e-05	0.00336643	1.13631
GDNF-AS1	3.74176	-0.853665	8.29513	4.78742e-08	8.78833e-06	8.69952
MC5R	3.712	0.485417	3.6373	0.00155225	0.024694	-1.57946
CYP4F29P	3.69862	-1.98177	3.84019	0.000959316	0.0178102	-1.11164
TDRD9	3.67269	3.72777	9.18212	8.8865e-09	2.28383e-06	10.3621
ESX1	3.64723	-2.83487	5.17284	4.05886e-05	0.00175296	2.00188
ASPG	3.64615	-2.35523	4.85609	8.5514e-05	0.00307679	1.26403
CCDC141	3.58277	-0.918621	6.19905	3.87176e-06	0.000291435	4.33626
STAT6	3.55664	2.8101	14.6447	1.87206e-12	1.53083e-09	18.5103
EDN1	3.5463	-0.032117	4.81161	9.50002e-05	0.00330571	1.16002
ZNF22-AS1	3.50377	-0.688406	7.33981	3.29717e-07	4.00784e-05	6.78578
CYP4F35P	3.43463	1.44907	5.38791	2.45842e-05	0.00117003	2.4992
CALHM5	3.36202	1.68599	13.0896	1.56524e-11	1.08302e-08	16.5104
ZNF558	3.3351	0.913824	9.95352	2.22575e-09	7.41506e-07	11.7216
LTF	3.29469	-3.73518	4.43321	0.00023339	0.00640167	0.273297
LINC01111	3.28925	-0.587899	3.94757	0.000742968	0.0147691	-0.862329
SUN3	3.27108	2.81603	10.7947	5.32591e-10	2.17757e-07	13.1173
ENSG00000236453	3.26276	2.10217	9.68901	3.54911e-09	1.06414e-06	11.2643
LINC01896	3.24852	5.63949	5.76655	1.02808e-05	0.000595356	3.36517
LINC01173	3.24109	-1.29615	6.04682	5.44632e-06	0.000366964	3.99686
ASNSP1	3.21958	-0.40376	3.46048	0.00235517	0.0320279	-1.98277
PPP1R1C	3.21956	-0.667482	5.84514	8.59534e-06	0.000527956	3.54315
ENSG00000286613	3.21456	1.74661	5.8072	9.37046e-06	0.000560048	3.45732
PTCHD1	3.17524	1.86889	7.7283	1.48233e-07	2.05131e-05	7.5795
BASP1	3.17104	4.15118	12.2854	5.08494e-11	3.02238e-08	15.3858
LIPG	3.16565	-0.878029	7.1698	4.70824e-07	5.26095e-05	6.43179
PTPRR	3.1241	1.68967	8.05851	7.63376e-08	1.23722e-05	8.23748
ENSG00000250284	3.10881	-0.234638	7.91056	1.02587e-07	1.53795e-05	7.94456
PTPRN	3.05407	-2.04256	4.37123	0.000270541	0.00722112	0.127956
ENSG00000267251	3.05248	-2.03207	6.5206	1.90091e-06	0.000164622	5.04393
CALHM4	3.04461	2.12925	4.86047	8.4633e-05	0.00306348	1.27427
WNT7B	3.03085	0.27254	4.2686	0.000345553	0.00868225	-0.112557
KRT8P10	3.02082	-1.26047	5.43887	2.18441e-05	0.0010737	2.6165
PID1	3.0164	-2.49877	5.3206	2.87482e-05	0.00131598	2.34393
NMU	3.00921	1.89327	6.56708	1.71698e-06	0.000152914	5.14516
SERPINB7	2.99259	3.55653	6.06632	5.21259e-06	0.000356557	4.04048
INSR	2.98949	0.211357	7.67397	1.65565e-07	2.1741e-05	7.46978
ARL14EPL	2.98806	-1.34267	4.50931	0.000194705	0.00555991	0.451771
ELN-AS1	2.94755	-1.51002	4.55543	0.000174471	0.00521446	0.559916
SPAG6	2.90035	-1.61854	5.7903	9.73857e-06	0.000578207	3.41902
PARP11	2.89812	0.334824	7.85662	1.14339e-07	1.68603e-05	7.83702
ENSG00000275216	2.89127	3.40301	8.03368	8.02027e-08	1.28826e-05	8.18854
CPA4	2.87254	-0.598824	5.7034	1.18774e-05	0.000659491	3.22169
CEP164P1	2.85506	0.88579	3.83565	0.000969707	0.0179291	-1.12213
TMSB15A	2.83529	-0.821518	5.83117	8.87286e-06	0.00053745	3.51156
GHDC	2.82226	2.42938	6.95887	7.36432e-07	7.62048e-05	5.98709
SENCR	2.81417	-1.12921	4.5338	0.000183685	0.00542448	0.509188
CGB8	2.80654	-2.07509	3.29154	0.00349693	0.0413609	-2.36316
SFTA1P	2.80058	4.94593	7.19361	4.47803e-07	5.04902e-05	6.48161
MISP	2.78233	1.63645	4.67272	0.000132033	0.0042946	0.834857
LRRK1	2.77836	-1.22003	4.25147	0.00035997	0.00893222	-0.152694
ADAMTS18	2.77542	-1.22703	3.80367	0.00104629	0.0188315	-1.19616
ENSG00000267150	2.76085	-0.647973	5.34715	2.70266e-05	0.00124989	2.40521
CDA	2.72957	-1.78578	5.02354	5.76173e-05	0.00228782	1.65478
NHS	2.7198	-0.904484	3.21415	0.00418578	0.0464542	-2.53548
DMKN	2.69682	0.729769	3.70142	0.00133363	0.0222767	-1.43214
C19orf33	2.68871	2.5477	3.95399	0.000731698	0.0146258	-0.847401
LINC01094	2.68465	-1.07767	5.17238	4.06328e-05	0.00175296	2.0008
GAS6	2.6758	5.09943	7.93942	9.68169e-08	1.46364e-05	8.00195
SLITRK3	2.67033	-2.5886	4.53323	0.000183932	0.00542448	0.507864
PPP1R14A	2.66624	1.82497	4.51005	0.000194365	0.00555991	0.453495
FGF1	2.63665	4.24006	7.06926	5.82286e-07	6.34869e-05	6.22059
ERC2	2.62669	1.24461	12.8454	2.22473e-11	1.42939e-08	16.1759
GAS6-DT	2.60436	0.477659	5.16251	4.1582e-05	0.00178075	1.97791
NMNAT3	2.59969	0.276924	7.94354	9.60208e-08	1.46364e-05	8.01013
KRT18P17	2.57074	-2.11526	3.94863	0.000741097	0.0147645	-0.859866
CCNA1	2.53078	2.55857	6.93086	7.81848e-07	7.96463e-05	5.92759
RPS2P32	2.52509	1.07226	4.63856	0.00014319	0.00455927	0.754795
YBX2	2.50895	4.53622	5.71803	1.14861e-05	0.000641725	3.25498
FAM189A2	2.45597	0.499936	6.15097	4.31105e-06	0.000313991	4.22936
TCP11	2.42992	2.05547	7.71329	1.52825e-07	2.06716e-05	7.54923
KCNK13	2.41591	0.379515	6.87246	8.86058e-07	8.74213e-05	5.80316
AOX1	2.40107	4.65705	6.27144	3.2951e-06	0.000259995	4.49669
LYPD5	2.38826	0.296733	4.44011	0.000229588	0.00632511	0.289462
HECW2-AS1	2.38189	-3.03584	3.34309	0.00310074	0.0383912	-2.24767
SCUBE3	2.37086	-0.768376	5.64442	1.3597e-05	0.000725847	3.08734
MGLL	2.35922	6.38337	6.25667	3.40515e-06	0.000262247	4.46401
TM4SF19	2.34743	-1.35367	5.24235	3.45011e-05	0.00155558	2.16299
ENSG00000287916	2.34643	4.31681	3.5704	0.00181809	0.0272862	-1.73262
ZC4H2	2.33993	3.36005	13.6834	6.79889e-12	4.89248e-09	17.3001
LVRN	2.33197	4.05606	5.3102	2.94532e-05	0.00133804	2.3199
ENSG00000283403	2.32231	-1.27625	5.32395	2.85253e-05	0.00130911	2.35166
COL16A1	2.32121	1.95148	5.16463	4.13767e-05	0.00177653	1.98282
CREB3L1	2.30637	4.035	6.52001	1.90336e-06	0.000164622	5.04265
GALE	2.29119	5.92895	6.15735	4.24993e-06	0.000313991	4.24356
RPL7P32	2.26822	-2.03638	3.37644	0.00286817	0.0366987	-2.17267
LDB2	2.25164	0.634979	5.63653	1.38457e-05	0.000732603	3.06933
KRT34	2.25086	-0.219494	4.1082	0.000506625	0.011266	-0.487842
NDUFB4P12	2.21629	-0.762639	3.83733	0.000965844	0.0178945	-1.11824
ENSG00000247810	2.21286	-2.10633	3.95153	0.000735994	0.0146791	-0.853118
DPF3	2.20739	0.945316	5.7415	1.08861e-05	0.000619597	3.3083
TIMM8AP1	2.20705	-0.636464	4.1425	0.000466823	0.0106575	-0.407673
SAMD9L	2.20359	1.25672	3.68833	0.00137564	0.022788	-1.46226
PPARG	2.20213	0.414012	3.53167	0.00199196	0.0286913	-1.82098
ENSG00000287095	2.19129	-3.79881	4.24147	0.00036866	0.00906044	-0.176111
ICAM4-AS1	2.1897	0.896729	5.13899	4.39373e-05	0.00184719	1.9233
GAS6-AS1	2.18855	3.03994	8.00768	8.4468e-08	1.34476e-05	8.13719
ENSG00000274849	2.17632	-1.54638	4.51252	0.000193226	0.00555991	0.459282
SERINC2	2.1757	0.724929	4.05889	0.000569848	0.012248	-0.60298
POU3F3	2.17042	-2.68813	5.19701	3.83572e-05	0.00167487	2.05794
GJC2	2.16767	-1.88908	3.22218	0.00410861	0.0458523	-2.51767
ZNF404	2.16616	6.14075	3.79862	0.00105891	0.0190118	-1.20784
ENSG00000276390	2.16414	-0.339662	4.64839	0.000139885	0.00448279	0.777837
HKDC1	2.16077	-0.850219	3.97554	0.000695084	0.0141615	-0.797251
LINC00705	2.15038	0.62123	4.92512	7.26514e-05	0.00272885	1.42528
EBF3	2.14124	0.955032	5.61094	1.46842e-05	0.000772422	3.01092
ARHGAP22	2.13822	0.0088169	3.41599	0.00261438	0.0343555	-2.08345
SH3GL2	2.13101	0.159227	6.40271	2.46362e-06	0.000204242	4.78598
RGS4	2.12796	-1.31728	3.29595	0.00346119	0.0411057	-2.3533
RPRM	2.11381	1.45074	5.38128	2.49656e-05	0.00117882	2.48392
ENSG00000260328	2.08071	-0.0392393	8.96764	1.32302e-08	3.12822e-06	9.97002
SFN	2.07947	0.608019	3.34117	0.00311464	0.0384389	-2.25197
PLEK2	2.07131	5.35772	5.88891	7.78188e-06	0.000489497	3.642
POU2F1-DT	2.06905	-1.59368	3.25512	0.00380613	0.0439064	-2.44442
NKX2-2-AS1	2.06035	-0.210754	5.37627	2.52578e-05	0.00118639	2.47238
LINC02057	2.06007	-0.666381	6.11166	4.70795e-06	0.000333057	4.14176
HIKESHIP2	2.0436	-0.646851	3.36025	0.00297888	0.0376985	-2.20911
LIPE	2.04359	3.3961	5.30485	2.9822e-05	0.00135138	2.30755
NKX2-2	2.04268	0.778651	5.58359	1.56379e-05	0.000810736	2.94841
COL4A5	2.03921	1.53283	3.76239	0.00115406	0.0202157	-1.29157
KIF26A	2.03596	2.00758	7.70456	1.55563e-07	2.07302e-05	7.53161
LINC00513	2.03506	5.0189	5.18821	3.91547e-05	0.00170143	2.03753
ENSG00000287287	2.02242	1.35844	4.92508	7.2658e-05	0.00272885	1.42519
OVGP1	2.02179	-0.829891	5.54783	1.69809e-05	0.000862954	2.86657
ZNF32-AS1	1.99618	3.01835	3.56314	0.00184948	0.0275432	-1.74918
LINC01116	1.99286	2.82222	7.84079	1.18047e-07	1.72071e-05	7.80537
CAMK2N1	1.98005	1.08319	6.7001	1.2852e-06	0.00012042	5.43329
ENSG00000228997	1.97412	-0.779001	5.45513	2.10368e-05	0.00103971	2.65388
SPEF2	1.96712	-1.41315	3.80975	0.00103128	0.0187402	-1.1821
LINC01186	1.96143	1.18019	4.79055	9.98538e-05	0.00344132	1.11077
HIKESHIP1	1.96049	-1.91256	4.20896	0.000398381	0.00952698	-0.252204
MOCOS	1.95953	3.87627	6.30552	3.05483e-06	0.000244791	4.572
PLAC1	1.94931	0.420883	4.13027	0.000480647	0.0108902	-0.436272
MYO5BP3	1.94632	-1.58197	3.90502	0.000822187	0.0158533	-0.961228
LINC02993	1.93651	-1.13988	3.67056	0.00143475	0.0235934	-1.5031
LINC00702	1.93471	0.550017	6.10736	4.75357e-06	0.000333176	4.13217
BTBD19	1.92566	0.725289	4.81884	9.33872e-05	0.00328922	1.17695
TFEB	1.91099	1.03729	3.79187	0.00107605	0.0192045	-1.22347
ZNF283	1.90791	6.32476	3.52779	0.00201025	0.0287934	-1.82982
SPECC1	1.90513	5.26784	12.8651	2.16222e-11	1.42939e-08	16.203
G2E3-AS1	1.90356	-1.45951	5.0185	5.83044e-05	0.00229518	1.64304
ENSG00000267279	1.89541	3.38365	5.85301	8.44287e-06	0.000525561	3.56095
LILRB3	1.89083	-1.05007	3.57302	0.00180686	0.0272012	-1.72662
TM4SF19-AS1	1.89025	0.820763	4.63338	0.00014496	0.00459206	0.742676
ZNF45-AS1	1.88231	1.69367	3.47926	0.00225348	0.0314508	-1.94017
SSR4	1.88196	6.29902	3.80757	0.00103663	0.0187742	-1.18714
SALL3	1.87598	6.66648	3.60623	0.00167056	0.0260001	-1.65066
GPSM3	1.87507	3.09412	3.79465	0.00106894	0.019134	-1.21702
LINC02018	1.87378	-1.61566	3.95259	0.000734149	0.0146585	-0.850666
RNU6-8	1.87223	-0.815643	4.58065	0.000164312	0.00501791	0.619063
COL4A6	1.87062	-0.270431	4.58581	0.000162312	0.00498291	0.631145
FOXG1-AS1	1.86535	-0.485623	4.52226	0.000188799	0.00550825	0.482121
NRN1	1.86534	4.69457	10.0641	1.83594e-09	6.28435e-07	11.9101
A1CF	1.86019	-1.41869	5.01998	5.81019e-05	0.00229222	1.64648
SMIM10	1.85852	2.24091	8.45476	3.50926e-08	7.01462e-06	9.00677
ALS2CL	1.83208	1.72506	4.09576	0.000521879	0.0114775	-0.516895
OR2W3	1.82216	1.33764	5.43581	2.19997e-05	0.00107548	2.60945
ENSG00000272599	1.81563	2.17326	7.94739	9.52834e-08	1.46364e-05	8.01777
ENSG00000276170	1.79936	3.09009	4.19528	0.000411601	0.00975986	-0.28423
RBPMS-AS1	1.78851	-0.0046584	4.19681	0.000410105	0.00974609	-0.280659
CENATAC	1.78416	5.76845	3.16661	0.00467262	0.0497439	-2.64068
DGCR11	1.78094	0.721118	5.22725	3.57399e-05	0.00158756	2.12801
LSMEM2	1.77866	5.06717	3.3028	0.00340634	0.0407719	-2.33797
PPP1R14B-AS1	1.7742	2.4414	3.74021	0.00121643	0.0209734	-1.34275
NTM	1.7729	4.91536	4.46367	0.000217055	0.00604461	0.344735
DPP4-DT	1.76512	-0.225894	4.93455	7.10537e-05	0.00268541	1.44728
ENSG00000212664	1.75305	-0.560409	4.59343	0.000159396	0.00491859	0.649021
IFITM3P2	1.74565	0.395991	4.65639	0.000137254	0.00442507	0.796582
ENSG00000272159	1.7447	4.21765	5.41985	2.28284e-05	0.00110696	2.57275
SYTL4	1.73961	1.50904	6.49475	2.01178e-06	0.000171526	4.98754
RPSAP12	1.73254	1.89752	3.22273	0.00410337	0.0458222	-2.51645
SHISAL2B	1.7316	-0.19341	4.1406	0.000468947	0.0106925	-0.412122
ENSG00000278917	1.73131	3.26182	3.7608	0.00115841	0.0202722	-1.29523
RPL12P14	1.72902	2.28952	4.41799	0.000242011	0.00657671	0.237594
DPF1	1.72633	5.40279	5.41122	2.32898e-05	0.00112328	2.55289
GATA2-AS1	1.71839	2.21433	7.7331	1.46794e-07	2.04715e-05	7.58918
LANCL3	1.71723	-0.637419	3.84475	0.000948959	0.017691	-1.10106
CIART	1.71454	2.10458	6.87654	8.78333e-07	8.74213e-05	5.81187
LINC00960	1.70737	-0.317724	6.58709	1.64354e-06	0.000148415	5.18865
ENSG00000240399	1.70441	-0.773689	3.23363	0.0040009	0.0452834	-2.49223
RPL32P18	1.6999	0.457916	3.20191	0.0043062	0.0473234	-2.56262
LINC02328	1.69916	0.917742	5.64454	1.35933e-05	0.000725847	3.08761
GPRC5A	1.68875	6.94801	5.73259	1.111e-05	0.000624589	3.28807
HAGLROS	1.68056	-0.37846	3.47812	0.00225955	0.0314981	-1.94276
ENSG00000231369	1.67538	-0.91677	3.56455	0.00184333	0.0274744	-1.74596
ENTPD3-AS1	1.66212	1.19306	3.634	0.00156445	0.024775	-1.58705
DERL3	1.66182	1.95648	3.48244	0.0022367	0.0313626	-1.93295
ATG12P1	1.66046	0.445131	5.83136	8.86887e-06	0.00053745	3.51201
C1QTNF2	1.66042	1.3292	3.41584	0.00261533	0.0343555	-2.0838
MIR17HG	1.66034	0.811866	4.75468	0.000108709	0.00367608	1.02681
KRT15	1.65671	3.31762	5.16158	4.16728e-05	0.00178075	1.97575
HYI	1.65421	5.66758	4.59541	0.000158649	0.00490746	0.653656
ESAM-AS1	1.65356	-1.6344	4.22344	0.000384857	0.00932155	-0.218314
NAT1	1.65168	1.00024	4.43313	0.000233435	0.00640167	0.273106
CENPN-AS1	1.65158	2.8655	6.22147	3.68287e-06	0.000279556	4.38601
PRDX4	1.64817	7.15197	4.30956	0.000313397	0.0081218	-0.0166055
ENSG00000267327	1.64803	0.149189	4.53234	0.000184322	0.00542708	0.505776
RPL13AP20	1.64381	2.97695	3.34472	0.00308896	0.038298	-2.24401
KRT8P3	1.64076	3.22389	8.20112	5.75739e-08	1.03575e-05	8.51688
LINP1	1.63764	-1.0722	4.06236	0.000565149	0.0121615	-0.594876
CDO1	1.63464	3.62926	4.30159	0.000319411	0.0082442	-0.0352823
HOXD-AS2	1.63361	1.73287	4.52754	0.000186442	0.00548053	0.494506
ENSG00000226084	1.62769	5.05057	3.90182	0.000828472	0.0159574	-0.968659
PSTPIP2	1.61874	1.41634	3.98656	0.000677067	0.0139364	-0.771586
TIMM8B	1.61833	6.02724	3.78134	0.00110329	0.0195549	-1.2478
WNT5B	1.61466	6.13353	4.1553	0.000452786	0.0104699	-0.377747
DNAAF11	1.61302	1.44466	5.92588	7.15631e-06	0.00045599	3.72532
RNVU1-30	1.60869	-1.75756	3.28008	0.00359143	0.0421185	-2.38875
TIMM8A	1.60192	4.59404	6.69076	1.31152e-06	0.00012225	5.41312
ZFHX4-AS1	1.60176	1.27427	5.84886	8.52296e-06	0.000527885	3.55156
ENSG00000268842	1.60121	-1.90802	3.31173	0.0033362	0.0402537	-2.31799
ENSG00000277806	1.59511	1.19942	4.23673	0.000372849	0.00911353	-0.187203
MPP1	1.59005	3.81465	9.46453	5.30834e-09	1.49214e-06	10.869
GBP1	1.58796	1.50546	3.77092	0.00113092	0.0198879	-1.27187
ICAM1	1.58743	2.3314	6.84457	9.40766e-07	9.09913e-05	5.74358
HOXD9	1.58015	3.96735	4.12569	0.000485929	0.0109137	-0.446981
CD163L1	1.57561	4.98	5.06818	5.18779e-05	0.00210199	1.7587
LINC00862	1.57513	-1.1004	3.74043	0.00121579	0.0209734	-1.34224
ENSG00000264067	1.57341	1.61472	4.06388	0.0005631	0.0121465	-0.591321
DOK6	1.56984	1.94039	5.81573	9.19025e-06	0.000551109	3.47663
HOXD3	1.5686	0.377104	3.98347	0.000682079	0.0139881	-0.778794
SRPX2	1.56825	0.713563	3.91816	0.000796875	0.0155317	-0.930713
ENSG00000248161	1.56424	1.32377	3.93882	0.000758621	0.015047	-0.882688
KRT8P33	1.56289	-0.705733	3.64649	0.00151889	0.0245285	-1.55839
AP1M2	1.56232	5.62345	3.40782	0.00266495	0.0347397	-2.10191
VPS11-DT	1.561	-1.7365	3.24849	0.0038652	0.0444313	-2.45918
RPL22L1	1.55474	5.734	4.92114	7.33363e-05	0.00274858	1.41599
ENSG00000279148	1.55467	-1.44123	4.94022	7.01087e-05	0.00265528	1.46053
ENSG00000230721	1.54909	-0.264684	3.2453	0.00389398	0.0445966	-2.46629
ZNF32-AS2	1.54694	1.41262	5.56717	1.62407e-05	0.00083003	2.91084
CATSPER1	1.54615	2.97529	3.20695	0.00425622	0.0470329	-2.55145
STK31	1.54556	-0.531538	3.63883	0.00154667	0.024694	-1.57597
SERTAD4-AS1	1.54544	2.40609	4.04097	0.000594718	0.0126615	-0.644778
EBNA1BP2	1.54033	9.36668	4.55582	0.00017431	0.00521446	0.560825
MMAB	1.53968	5.53062	3.42982	0.00253098	0.0337238	-2.0522
PROSER2	1.53871	3.24611	4.50515	0.000196645	0.00559695	0.442004
TRIM52-AS1	1.53832	3.75515	3.45333	0.0023951	0.0322998	-1.99899
ZCCHC18	1.53698	-0.731267	4.33785	0.000292954	0.00770504	0.0496931
ENSG00000257086	1.52556	1.89816	3.56862	0.00182571	0.0273249	-1.73666
ENSG00000267655	1.52536	1.01809	3.82987	0.000983137	0.0180845	-1.13553
LSM 3.00	1.52477	6.37339	4.28802	0.000329912	0.00838549	-0.0670609
KRT8	1.5215	10.6398	4.40871	0.000247419	0.00671353	0.215846
TPM1-AS	1.52141	3.10141	5.94811	6.80506e-06	0.00044196	3.77537
ZNF32	1.51361	5.04058	4.26238	0.000350721	0.00876315	-0.127135
SEMA7A	1.51025	2.43341	4.60487	0.000155121	0.00483644	0.675836
ENSG00000270039	1.51004	-1.47473	3.81862	0.00100978	0.0184697	-1.16158
HIF1A-AS3	1.50442	0.882929	3.3476	0.00306821	0.0380933	-2.23753
RPS23P8	1.50121	-1.71515	3.38734	0.00279591	0.0360046	-2.14811
CBR1-AS1	-1.50105	3.66917	-6.17087	4.12334e-06	0.000307409	4.27364
STC2	-1.50107	4.12664	-3.45676	0.00237586	0.0321618	-1.99121
TERT	-1.50175	1.40455	-4.16966	0.00043754	0.0102404	-0.344166
PPP1R3F	-1.51233	-1.03856	-3.71273	0.00129834	0.0218088	-1.40609
SMAD3	-1.51263	6.25273	-5.93286	7.04395e-06	0.000454196	3.74106
ENSG00000258745	-1.5135	1.56172	-4.95797	6.72357e-05	0.00257904	1.50194
SH3PXD2B	-1.51695	3.87439	-6.06876	5.184e-06	0.000355955	4.04595
TLCD2	-1.51701	1.10527	-3.46179	0.00234794	0.0319921	-1.9798
ENSG00000205584	-1.51924	-2.10352	-3.2284	0.00404979	0.0455567	-2.50386
ALDH5A1	-1.52338	3.60471	-5.23619	3.50008e-05	0.00156633	2.14873
ARHGAP27	-1.5252	2.78061	-4.35332	0.000282345	0.00750278	0.0859605
SLC26A1	-1.52992	-0.0594409	-3.24237	0.00392054	0.0447245	-2.4728
SCUBE2	-1.53014	-0.69089	-4.60312	0.000155768	0.00484822	0.671728
SH3GL3	-1.53079	0.901493	-5.08552	4.98078e-05	0.00205514	1.79904
SLC26A10	-1.53346	2.11245	-6.9298	7.83624e-07	7.96463e-05	5.92533
GRIK5	-1.53359	-1.3476	-3.65206	0.00149899	0.0243163	-1.54559
MMP16	-1.53612	2.31672	-3.25048	0.00384738	0.044283	-2.45475
GPR153	-1.53766	-0.0639346	-4.02373	0.000619677	0.0130234	-0.684992
ZMYND8	-1.53783	5.64965	-5.13797	4.40426e-05	0.00184719	1.92093
SLC4A8	-1.53851	2.91114	-6.13967	4.42154e-06	0.000319452	4.20419
FZD4	-1.53889	1.9932	-5.44433	2.15695e-05	0.00106311	2.62906
VWDE	-1.54039	0.689014	-3.84659	0.000944826	0.0176322	-1.09681
CNTNAP1	-1.54217	3.94536	-4.71733	0.000118772	0.00396262	0.939366
SPIRE2	-1.54495	2.93528	-4.68266	0.000128955	0.00421799	0.858146
FRMD5	-1.55317	0.349997	-4.59769	0.00015779	0.00489422	0.659009
H1-0	-1.55418	3.96899	-4.28792	0.000329995	0.00838549	-0.0673077
C20orf204	-1.56613	0.161059	-4.74979	0.000109976	0.00371169	1.01537
APLP1	-1.56867	4.24547	-4.37714	0.000266759	0.00714137	0.141801
DNAH1	-1.56871	0.615268	-4.34141	0.000290476	0.00766226	0.0580452
EML6	-1.57522	1.24427	-3.60619	0.00167072	0.0260001	-1.65075
FAM66C	-1.57849	-0.0647669	-5.60505	1.48846e-05	0.000778412	2.99745
CNNM4	-1.58178	3.04375	-5.42007	2.28171e-05	0.00110696	2.57324
ENSG00000247903	-1.58417	2.06106	-6.07316	5.13301e-06	0.000353804	4.05579
ENSG00000257096	-1.58451	-1.90085	-3.35126	0.00304212	0.0379263	-2.22931
RNF212	-1.58898	1.21929	-6.10679	4.75966e-06	0.000333176	4.13089
USP27X	-1.59262	1.79073	-4.568	0.000169333	0.00511984	0.589383
RNF157	-1.59529	3.74244	-5.01528	5.87477e-05	0.00230758	1.63554
ZNF425	-1.59823	-0.322134	-5.81876	9.12705e-06	0.000549149	3.48349
SH3PXD2A	-1.61206	0.401901	-3.46711	0.00231879	0.0318359	-1.96774
ARRB1	-1.61371	2.38463	-3.80348	0.00104678	0.0188315	-1.19662
ZBTB1	-1.61666	3.51955	-3.19684	0.00435713	0.0476821	-2.57386
TNIK	-1.62382	3.26332	-4.51851	0.000190491	0.00551841	0.473331
ERBB3	-1.62845	1.73944	-4.64936	0.000139564	0.00448279	0.780109
BSN	-1.63114	0.209475	-3.55517	0.0018846	0.0278358	-1.76739
ASIC1	-1.63139	2.71698	-4.38712	0.000260485	0.00701516	0.165214
FN1	-1.63941	2.4915	-3.71606	0.00128814	0.0216781	-1.39842
PPFIBP2	-1.63943	0.409485	-3.22769	0.00405643	0.045581	-2.50543
KLF7	-1.63997	4.90401	-3.41374	0.00262823	0.0344158	-2.08854
CLDN14-AS1	-1.64024	-0.592195	-3.60403	0.0016793	0.0260211	-1.65571
ABCD1	-1.64086	1.87765	-3.9064	0.000819498	0.0158184	-0.958032
CCDC136	-1.64217	-0.0352221	-3.95974	0.000721745	0.014459	-0.834023
KCNH2	-1.64379	-1.06508	-3.59081	0.00173257	0.0265456	-1.68596
FBXO41	-1.64578	3.23842	-8.14821	6.39068e-08	1.08461e-05	8.41354
CHRM4	-1.64933	-1.92134	-3.60351	0.00168134	0.0260304	-1.65689
PTGER4	-1.65504	0.122507	-3.36011	0.00297984	0.0376985	-2.20942
DOP1B	-1.65943	2.89236	-3.56691	0.00183312	0.0273902	-1.74058
GRAMD4	-1.66203	1.93688	-6.25235	3.438e-06	0.000262247	4.45446
PUDP	-1.66401	2.82292	-6.54892	1.78657e-06	0.000156782	5.10564
ACACB	-1.6645	1.89686	-5.82404	9.01789e-06	0.000544402	3.49545
PAQR9	-1.66511	-0.317204	-4.16365	0.000443864	0.0103034	-0.358237
ENSG00000286259	-1.66771	-0.975089	-4.52477	0.000187672	0.00549873	0.488023
HERC2P4	-1.66855	0.0265469	-3.33424	0.00316546	0.038792	-2.26752
WHRN	-1.67005	2.78803	-7.86139	1.13245e-07	1.6837e-05	7.84655
ADAM11	-1.67484	2.51911	-6.21566	3.73092e-06	0.000282014	4.37312
AKAP5	-1.67602	0.90315	-3.66999	0.00143672	0.0236007	-1.50443
MATN1-AS1	-1.67784	-1.63829	-4.55538	0.000174492	0.00521446	0.559798
ADAM8	-1.67901	0.328255	-4.34484	0.000288108	0.00762216	0.066092
AGBL2	-1.68712	1.40531	-5.60756	1.47988e-05	0.000776184	3.00319
STS	-1.69731	-0.746504	-4.81783	9.3612e-05	0.00328922	1.17457
HSPA2	-1.69854	2.22497	-5.84496	8.59872e-06	0.000527956	3.54276
EFNB3	-1.69968	0.879807	-3.8367	0.000967306	0.0179031	-1.11972
ENSG00000261770	-1.69993	-1.06059	-5.58021	1.57602e-05	0.000810991	2.94067
NRIP3-DT	-1.70608	-1.45904	-3.98725	0.000675954	0.0139295	-0.769978
RIMS3	-1.7121	2.45893	-6.02978	5.65936e-06	0.000377081	3.9587
FAM78A	-1.71495	0.48878	-6.8604	9.09309e-07	8.84241e-05	5.7774
ARHGEF37	-1.71963	-1.51774	-3.34273	0.00310331	0.0383966	-2.24846
C1orf167	-1.72358	0.737358	-4.69883	0.0001241	0.00408147	0.89603
MKRN9P	-1.72834	-1.31489	-3.54701	0.00192123	0.0281365	-1.78601
PLPPR5	-1.72871	-0.765703	-3.64316	0.00153091	0.0246552	-1.56603
ZNF362	-1.72872	1.71335	-4.08565	0.000534617	0.0116862	-0.540508
F2RL1	-1.73305	5.31568	-4.00078	0.000654508	0.0135496	-0.738463
NRBP2	-1.7354	2.28868	-3.73994	0.00121722	0.0209734	-1.34338
ITGAM	-1.73893	1.9806	-8.23454	5.39119e-08	9.79673e-06	8.58195
SYT11	-1.74308	0.996817	-5.75603	1.05306e-05	0.000603329	3.3413
BST1	-1.75017	0.0185949	-6.30542	3.05551e-06	0.000244791	4.57178
RAB11FIP4	-1.75118	-0.926852	-3.5103	0.00209475	0.0297667	-1.86962
MORN3	-1.75344	-1.63652	-3.46942	0.00230625	0.031817	-1.96251
NOVA2	-1.75729	0.115895	-3.87606	0.000880857	0.016663	-1.02846
LINC00205	-1.76076	4.0488	-4.51967	0.000189965	0.00551841	0.476054
CLVS2	-1.76639	-0.438363	-4.62774	0.000146917	0.00463691	0.729442
PATL2	-1.76886	-0.585245	-4.07576	0.000547376	0.0118929	-0.563598
SEMA4B	-1.77269	4.7508	-4.5737	0.000167053	0.00506793	0.602752
NF1P8	-1.77518	-1.78169	-3.73011	0.00124594	0.0212781	-1.36605
MAGEH1	-1.7796	0.282431	-3.70907	0.00130967	0.021958	-1.41453
EOMES	-1.77987	0.217476	-6.06055	5.2806e-06	0.000358483	4.02759
NPHS1	-1.78759	-1.64971	-4.07405	0.000549611	0.0119179	-0.567587
IFFO1	-1.78885	2.21482	-5.87716	7.99218e-06	0.000500973	3.61549
DYNC2I1	-1.78888	1.74438	-6.19606	3.89769e-06	0.000292164	4.32962
RASSF2	-1.79381	2.18756	-7.79528	1.2941e-07	1.83314e-05	7.71421
RIMKLA	-1.79443	-0.491464	-3.58087	0.00177369	0.0269044	-1.70868
ENSG00000265417	-1.79787	0.74305	-4.14542	0.00046359	0.0106245	-0.400861
RAB20	-1.80177	-0.169042	-4.45889	0.000219544	0.00609507	0.333505
TM4SF1-AS1	-1.8019	-0.480933	-4.52066	0.000189517	0.00551684	0.478384
ENSG00000267372	-1.80225	1.67173	-5.6232	1.42764e-05	0.000753175	3.0389
CRYZL2P	-1.80334	0.34422	-6.04793	5.43269e-06	0.000366964	3.99935
KCND1	-1.80441	1.96969	-4.61354	0.000151958	0.0047709	0.696158
FHL1	-1.8074	4.27229	-4.16947	0.000437737	0.0102404	-0.344608
CEL	-1.80775	-0.901096	-4.1266	0.000484875	0.0109036	-0.444853
GLIS3	-1.808	1.4749	-3.50936	0.00209943	0.0298096	-1.87177
THBS3-AS1	-1.80874	2.27311	-4.83216	9.04921e-05	0.00323007	1.20808
LGI2	-1.80953	-0.222096	-3.7256	0.00125933	0.0213949	-1.37644
SYT5	-1.81456	-1.42322	-3.17109	0.00462454	0.049428	-2.6308
CCDC92B	-1.81805	-1.4006	-4.91179	7.49723e-05	0.00279245	1.39416
DTX3	-1.8198	1.25904	-3.47038	0.00230102	0.0317936	-1.96032
FCHO1	-1.82452	-0.467106	-3.51081	0.00209225	0.0297546	-1.86846
PAQR6	-1.82813	0.908475	-3.63582	0.00155771	0.024694	-1.58287
ENSG00000264272	-1.83324	-0.642528	-4.10599	0.000509303	0.0112837	-0.493006
NNT	-1.83787	2.37116	-3.84392	0.00095084	0.0177045	-1.10299
F2RL2	-1.83839	-0.42691	-3.41597	0.00261452	0.0343555	-2.0835
LINC01341	-1.84446	-1.45467	-3.86561	0.000903022	0.0169931	-1.05269
ARSJ	-1.84458	1.20392	-3.24561	0.00389112	0.0445966	-2.46558
FGF5	-1.84458	4.57517	-5.64598	1.35485e-05	0.000725847	3.09089
SBK3	-1.84603	-1.45527	-3.28225	0.00357334	0.0420358	-2.3839
MFNG	-1.84857	-0.552943	-3.5308	0.00199604	0.0287073	-1.82295
ODAD4	-1.85264	-1.5307	-3.17187	0.00461623	0.0494015	-2.62908
ENSG00000277117	-1.85333	-0.742265	-5.12611	4.52836e-05	0.00189014	1.89339
GPRASP1	-1.85397	0.296344	-3.33373	0.00316923	0.0388117	-2.26866
MYCL	-1.85477	-1.19904	-3.8497	0.000937864	0.017551	-1.0896
CDC42BPG	-1.85508	-1.17387	-3.43504	0.00250015	0.0334582	-2.04039
ADCY1	-1.85587	-2.768	-3.54898	0.00191228	0.0280664	-1.7815
RNF157-AS1	-1.85767	2.55102	-5.07478	5.10797e-05	0.00209321	1.77406
H6PD	-1.85865	2.86773	-4.08776	0.000531931	0.0116416	-0.535575
PCDHB5	-1.86134	1.484	-5.2363	3.49922e-05	0.00156633	2.14898
F2R	-1.86618	4.26082	-3.57511	0.00179797	0.0271533	-1.72185
DAPK2	-1.87468	-1.4512	-3.26456	0.00372348	0.0431885	-2.42337
FOXE1	-1.87699	1.64804	-5.43727	2.19253e-05	0.00107476	2.61282
ENSG00000279833	-1.87834	1.30805	-4.61954	0.000149808	0.00471511	0.710214
EPB41L1	-1.88579	2.87306	-7.09429	5.52216e-07	6.08035e-05	6.27329
TPI1P2	-1.88763	-0.136875	-3.97238	0.000700329	0.014188	-0.804596
ANKRD7	-1.89557	-0.586985	-3.4665	0.00232208	0.0318359	-1.96911
PDGFRB	-1.89633	-1.16023	-4.95916	6.70477e-05	0.00257733	1.50471
PIM2	-1.89921	3.55918	-7.65684	1.71455e-07	2.23512e-05	7.43509
USP27X-DT	-1.90616	-0.731199	-3.30347	0.00340103	0.0407519	-2.33647
ENSG00000228549	-1.91134	-1.29829	-3.80888	0.00103343	0.0187413	-1.18412
PXDN	-1.91362	4.19918	-4.81169	9.49808e-05	0.00330571	1.16022
ZIC1	-1.91423	0.942195	-4.94522	6.92873e-05	0.0026297	1.47219
KCNAB2	-1.91635	-0.102553	-4.65929	0.000136309	0.0044025	0.8034
EGR1	-1.91704	1.92344	-3.65673	0.0014825	0.024136	-1.53487
PDE4DIPP2	-1.92052	-0.681476	-3.27757	0.00361246	0.042255	-2.39435
LTBP2	-1.92412	4.24085	-5.31181	2.93425e-05	0.00133638	2.32364
TUBB4A	-1.92681	-0.530912	-3.78991	0.00108105	0.0192619	-1.22798
SERPINB9	-1.93523	-0.062954	-4.21508	0.000392613	0.00944266	-0.237894
MAFA	-1.93791	-1.21871	-4.27318	0.000341799	0.00862407	-0.10183
CHGB	-1.93974	2.36657	-6.25206	3.44026e-06	0.000262247	4.4538
PCDHB2	-1.95064	1.67871	-6.11043	4.72093e-06	0.000333057	4.13902
SLC12A7	-1.95302	1.66246	-7.23324	4.12027e-07	4.75152e-05	6.56436
SNAP25	-1.95716	0.51487	-3.56167	0.00185592	0.0275544	-1.75255
PTN	-1.95983	-0.958357	-4.88055	8.0711e-05	0.00294521	1.3212
TMEM38A	-1.95993	0.411479	-5.58055	1.57478e-05	0.000810991	2.94145
ATG9B	-1.96411	-2.28291	-3.20505	0.00427501	0.0470742	-2.55566
RHBDL1	-1.97426	-0.604738	-3.18597	0.00446813	0.0485104	-2.59792
LIF	-1.97433	2.49201	-6.61001	1.56337e-06	0.000142767	5.2384
SCNN1D	-1.97848	0.563509	-3.38121	0.00283632	0.0363947	-2.16192
RTN1	-1.98051	1.24471	-4.20676	0.000400479	0.00953408	-0.257358
PCDHB1-AS1	-1.9845	1.15296	-5.65705	1.32087e-05	0.000715735	3.11613
WDR87BP	-1.98842	-1.94907	-3.21878	0.00414112	0.0461067	-2.52521
GCNT1	-1.99861	1.3549	-4.33198	0.000297078	0.0078021	0.0359519
SDC3	-1.99896	3.86151	-6.26002	3.37986e-06	0.000262247	4.47142
JDP2-AS1	-2.00553	-0.808266	-3.91051	0.000811526	0.0157342	-0.948493
TRERF1	-2.00887	3.04104	-7.82878	1.20942e-07	1.7406e-05	7.78134
PIANP	-2.00947	0.131928	-6.06397	5.24019e-06	0.000357087	4.03523
PFKFB1	-2.01163	-2.34199	-3.47383	0.00228246	0.0316345	-1.9525
THBS3	-2.01248	3.43822	-5.31346	2.92302e-05	0.00133465	2.32744
DNAH10	-2.0159	-1.86078	-3.29656	0.00345627	0.0411057	-2.35194
LINC01232	-2.0214	-1.36166	-4.79425	9.89844e-05	0.00341791	1.11942
DPY19L2P2	-2.0248	1.78343	-4.76875	0.000105145	0.0035826	1.05975
SESN3	-2.02662	-0.0722506	-3.60247	0.00168548	0.0260435	-1.65927
QRICH2	-2.03492	0.984136	-7.47636	2.48374e-07	3.10295e-05	7.06716
GAL3ST4	-2.03994	-1.0756	-5.7767	1.00454e-05	0.000588652	3.38819
FAM110B	-2.04129	-1.03315	-5.16671	4.11754e-05	0.00177212	1.98765
PCDHB11	-2.04391	-0.123748	-5.07788	5.0709e-05	0.0020837	1.78128
ENSG00000236829	-2.04936	-1.20441	-3.47128	0.00229614	0.0317507	-1.95827
SLC6A16	-2.0496	-1.66592	-4.24225	0.000367975	0.00906044	-0.174286
STXBP2	-2.05331	0.0730704	-3.17162	0.00461886	0.0494015	-2.62963
DPP4	-2.05345	-1.34936	-3.39734	0.0027312	0.0354249	-2.12556
ENSG00000286623	-2.05351	-0.0209013	-3.396	0.00273976	0.0355103	-2.12858
TMEM163	-2.05404	-0.431459	-4.81579	9.40649e-05	0.00329227	1.1698
CELSR1	-2.05817	3.45586	-7.21345	4.29512e-07	4.92161e-05	6.52306
YPEL3	-2.05905	-1.379	-5.07382	5.11957e-05	0.00209321	1.77181
PIK3C2B	-2.0648	1.58894	-6.94973	7.5095e-07	7.71977e-05	5.96768
ABCA3	-2.06893	4.98622	-8.90165	1.49711e-08	3.40924e-06	9.84812
ENSG00000233820	-2.07403	-2.50772	-4.2066	0.000400634	0.00953408	-0.257737
ENSG00000286169	-2.07449	-0.0719176	-3.80687	0.00103838	0.0187742	-1.18877
IFT140	-2.07949	3.34544	-7.19229	4.49051e-07	5.04902e-05	6.47884
ICOSLG	-2.08008	-0.803858	-4.08005	0.000541801	0.0117916	-0.553576
SRPX	-2.08133	2.65663	-5.74022	1.09178e-05	0.000619597	3.30541
CERS4	-2.08396	-0.413767	-3.80705	0.00103792	0.0187742	-1.18835
PELI2	-2.09656	-2.34639	-3.21872	0.00414166	0.0461067	-2.52534
ENSG00000287769	-2.10131	-1.12977	-5.98567	6.25118e-06	0.000410584	3.85979
MAMSTR	-2.10145	0.230874	-3.78326	0.00109827	0.0194851	-1.24336
SYNGR1	-2.10209	1.9229	-4.89323	7.83313e-05	0.00287417	1.3508
CLDN4	-2.11368	0.395015	-4.08973	0.000529446	0.0116014	-0.530991
ENSG00000280029	-2.11565	-0.122434	-5.52876	1.77445e-05	0.000894185	2.82288
PGAM2	-2.12187	-0.847994	-4.04271	0.000592257	0.0126241	-0.640721
ZNF793-AS1	-2.12897	1.47275	-8.78646	1.86011e-08	4.16191e-06	9.6339
PRDM8-AS1	-2.13223	0.361533	-3.1905	0.00442155	0.0481208	-2.5879
IGSF3	-2.1497	2.09702	-5.76721	1.02652e-05	0.000595356	3.36667
ITGB6	-2.15016	-2.39048	-3.35592	0.00300918	0.0378406	-2.21884
LINC01460	-2.1671	-1.82116	-3.23156	0.00402013	0.0453854	-2.49683
SEL1L3	-2.17018	3.54464	-4.24071	0.000369325	0.00906433	-0.177881
IQCN	-2.17024	0.39023	-3.36722	0.0029307	0.0372603	-2.19342
SOX2	-2.17377	0.0844231	-3.75003	0.00118841	0.0205969	-1.3201
ENSG00000231305	-2.1927	-1.09138	-7.20097	4.40927e-07	5.02043e-05	6.49699
TMEM108	-2.19698	-0.892989	-3.53842	0.00196051	0.0284202	-1.80559
PTP4A3	-2.19775	2.51398	-4.12707	0.000484324	0.0109036	-0.443739
EID3	-2.19883	-0.180344	-7.42362	2.77012e-07	3.41332e-05	6.95879
FAM83H	-2.19913	0.594506	-5.94325	6.88033e-06	0.000445241	3.76443
ABCD2	-2.20419	0.842769	-4.43574	0.000231989	0.00638147	0.279223
BTNL9	-2.20771	2.0515	-5.64026	1.37276e-05	0.000730651	3.07784
TTYH2	-2.21113	1.77969	-9.64841	3.81541e-09	1.10708e-06	11.1933
CMTM1	-2.21551	-1.46594	-3.37165	0.0029005	0.0370011	-2.18346
KIF28P	-2.22224	-2.33515	-3.42128	0.00258216	0.0342322	-2.0715
CACNA1B	-2.22231	0.281901	-5.36179	2.6122e-05	0.0012143	2.43899
CORO2B	-2.2238	2.69672	-4.95014	6.8489e-05	0.0026049	1.48366
ENSG00000272114	-2.22781	-1.28031	-3.57571	0.00179544	0.0271533	-1.72048
JAG1	-2.23314	1.779	-4.9182	7.38479e-05	0.00275627	1.40911
FIGNL1	-2.23502	2.00806	-4.71678	0.000118927	0.00396262	0.938079
MYOM1	-2.23732	-1.43339	-4.73244	0.000114593	0.00385332	0.974745
MAPT	-2.23756	0.347489	-4.84679	8.74153e-05	0.00313892	1.24229
CLIP3	-2.23777	4.20944	-4.78556	0.000101041	0.00347559	1.09909
DCBLD2	-2.24041	6.79551	-5.91244	7.37756e-06	0.000467332	3.69505
NYNRIN	-2.24711	-0.226678	-4.10203	0.000514136	0.0113768	-0.502254
BARX2	-2.24961	0.271088	-5.55838	1.65731e-05	0.000844618	2.89071
CLIP4	-2.25194	-0.040081	-4.27875	0.000337294	0.00853375	-0.0887998
HSF2BP	-2.25265	-0.969692	-5.3652	2.59157e-05	0.00121097	2.44686
SYT12	-2.26309	-1.84764	-3.63984	0.00154295	0.024694	-1.57363
FAM86FP	-2.26392	-1.00868	-4.71984	0.000118068	0.00395538	0.945238
TNFAIP2	-2.26519	-0.302773	-4.85681	8.53688e-05	0.00307679	1.26571
ENSG00000259436	-2.27455	0.047575	-6.28887	3.16987e-06	0.000252327	4.53523
TMEM229B	-2.27616	-0.888028	-4.34851	0.000285596	0.00756682	0.0747027
KIRREL2	-2.27796	2.0504	-7.64469	1.7576e-07	2.27476e-05	7.41048
TNS3	-2.28093	2.48389	-6.09637	4.87224e-06	0.000338423	4.10764
FAM201A	-2.30523	1.45345	-7.71685	1.51721e-07	2.06716e-05	7.55642
NTSR1	-2.30831	3.34526	-4.09036	0.000528641	0.0115979	-0.529502
NECAB2	-2.31725	-1.44439	-3.52147	0.00204039	0.0291785	-1.8442
GATM	-2.32319	-0.688791	-4.6998	0.000123815	0.00407954	0.898305
PRRT2	-2.32694	-0.622718	-4.02024	0.00062485	0.0130407	-0.693121
KLLN	-2.33699	-1.59484	-5.07268	5.13326e-05	0.00209342	1.76917
DIXDC1	-2.34338	1.43247	-3.81665	0.00101452	0.0185103	-1.16614
ENSG00000216906	-2.34745	-1.27214	-3.22819	0.00405173	0.0455567	-2.50432
ZNF217	-2.35727	4.80794	-4.11015	0.000504277	0.0112416	-0.483291
SLCO5A1	-2.35872	-1.29072	-4.16698	0.000440344	0.0102496	-0.350431
LTBP1	-2.36119	1.45579	-4.54827	0.000177469	0.00527712	0.543121
TGFB2	-2.36128	2.0902	-3.69796	0.00134461	0.0223977	-1.4401
PDZD4	-2.36167	-1.59	-4.15773	0.000450167	0.0104228	-0.37206
SCARA3	-2.36979	0.884756	-4.52235	0.000188756	0.00550825	0.482346
LINC00235	-2.37541	-1.92438	-7.53988	2.17889e-07	2.77573e-05	7.19719
RAP1GAP	-2.38144	0.126951	-5.04476	5.48133e-05	0.00219131	1.70419
VGF	-2.3822	5.69548	-3.62043	0.00161544	0.0253373	-1.61815
ELFN2	-2.38446	-0.635512	-4.60927	0.000153508	0.00480278	0.68615
MYH16	-2.39735	-1.45503	-3.83084	0.00098088	0.0180614	-1.13329
GALNT6	-2.40542	2.33109	-6.99977	6.74939e-07	7.18471e-05	6.07379
GPR132	-2.41503	-2.04038	-3.74133	0.00121319	0.0209657	-1.34016
ZNF618	-2.41575	0.41534	-4.74903	0.000110175	0.00371169	1.01358
MXRA8	-2.41734	0.845964	-5.1469	4.31307e-05	0.00182141	1.94167
AIF1L	-2.422	3.092	-9.63349	3.91844e-09	1.11893e-06	11.1671
LRP1	-2.42623	2.57067	-4.26091	0.000351955	0.00878179	-0.130584
TM4SF18	-2.42678	4.32243	-8.16111	6.22987e-08	1.08274e-05	8.43878
ADAMTS7	-2.44094	-1.63471	-3.88407	0.000864219	0.0164249	-1.00987
SSC5D	-2.44679	-1.92134	-3.69148	0.0013654	0.022681	-1.455
TSSK5P	-2.45758	0.0145655	-3.3732	0.00288995	0.0369249	-2.17995
ADAMTS15	-2.46333	-1.02746	-3.75745	0.00116767	0.0204144	-1.30297
NPY1R	-2.46926	-1.5461	-3.46495	0.00233056	0.0318592	-1.97263
ZNF853	-2.47324	-0.617999	-4.02938	0.000611374	0.012894	-0.671798
C17orf113	-2.48636	-1.25404	-4.12064	0.000491812	0.0110173	-0.458772
FBXO2	-2.48765	0.303652	-3.32071	0.00326706	0.0397125	-2.29788
TMEM37	-2.51141	-1.04692	-4.522	0.000188916	0.00550825	0.481515
ENSG00000268191	-2.51434	-3.06673	-3.57262	0.00180857	0.0272042	-1.72753
CHD5	-2.51468	-0.35931	-5.84173	8.66224e-06	0.000529213	3.53545
ENDOD1	-2.51811	1.87981	-5.41825	2.29135e-05	0.0011081	2.56906
NLGN3	-2.52773	-0.709356	-7.56107	2.08604e-07	2.68056e-05	7.24043
KIF5A	-2.52876	1.18456	-6.32459	2.92832e-06	0.000237299	4.61408
STC1	-2.53002	4.40509	-5.75041	1.06665e-05	0.000609178	3.32855
COMP	-2.54588	-2.15878	-4.20658	0.000400654	0.00953408	-0.257786
SLC22A17	-2.55212	0.3403	-3.66853	0.00144169	0.0236053	-1.50778
SALL2	-2.55351	0.318696	-7.1137	5.3e-07	5.88561e-05	6.31411
SRSF12	-2.5574	-0.466289	-4.0262	0.000616039	0.0129772	-0.679233
GRK5	-2.56034	1.94652	-11.8222	1.03013e-10	5.14779e-08	14.7075
NKD2	-2.56617	0.466187	-3.83936	0.000961199	0.0178268	-1.11355
FBLN2	-2.5674	0.382195	-4.31467	0.000309598	0.00804865	-0.00461976
IL1R1	-2.56796	1.20242	-5.51262	1.84183e-05	0.000922968	2.78587
LHX1	-2.57609	0.338147	-6.41609	2.39194e-06	0.000199218	4.81535
ULBP1	-2.57679	1.11054	-4.58	0.000164567	0.00501791	0.617534
LINC00511	-2.57704	-1.68332	-3.51084	0.00209213	0.0297546	-1.8684
PPFIA4	-2.57988	0.28216	-4.92861	7.2055e-05	0.00271755	1.43343
PDE4B	-2.58001	0.117217	-4.00938	0.000641239	0.0133055	-0.718439
KCNF1	-2.58527	-2.28831	-4.57822	0.000165267	0.00502873	0.613349
KHDRBS3	-2.58934	0.0898411	-5.23754	3.48911e-05	0.00156633	2.15184
LHX6	-2.59131	-1.22506	-7.68907	1.60547e-07	2.1237e-05	7.50032
OR1F1	-2.59689	-1.90212	-3.25498	0.00380733	0.0439064	-2.44472
CDX2	-2.5999	-2.1117	-5.2033	3.77976e-05	0.00166254	2.07251
WSCD1	-2.60338	-1.05133	-3.58396	0.00176078	0.0267991	-1.70161
RBM20	-2.60757	-1.22968	-3.63097	0.00157567	0.0248888	-1.59398
PRAG1	-2.62126	0.272386	-7.41483	2.82104e-07	3.45242e-05	6.9407
CLMN	-2.62835	1.65796	-4.61001	0.000153237	0.00480268	0.687889
ITGB3	-2.63324	-2.13497	-3.2557	0.00380104	0.04389	-2.44314
ARSD	-2.63427	-0.540169	-3.41928	0.00259434	0.0342673	-2.07603
LRRC56	-2.64122	-0.605084	-4.4697	0.000213962	0.00599559	0.35887
RASD2	-2.64898	-0.752041	-6.43742	2.28211e-06	0.000191847	4.86211
CACNG8	-2.66789	1.52638	-4.77284	0.000104131	0.00356144	1.06933
NAALAD2	-2.67834	-0.836221	-4.86991	8.27666e-05	0.00300802	1.29633
EMP2	-2.68273	1.74733	-6.27573	3.26382e-06	0.000258661	4.50617
SLC16A2	-2.69355	1.59797	-4.83849	8.9148e-05	0.00318842	1.22288
BMPER	-2.69681	-0.630427	-4.30219	0.000318953	0.0082442	-0.0338734
CHDH	-2.72151	-0.37337	-7.33515	3.3294e-07	4.01986e-05	6.77612
EYA1	-2.732	-2.76517	-3.72053	0.00127455	0.0215702	-1.38812
ATF7IP2	-2.74057	0.436002	-7.24148	4.04964e-07	4.7002e-05	6.58154
ACRBP	-2.75032	-2.02944	-4.49414	0.000201864	0.005701	0.416196
MYO10	-2.75309	-2.85489	-4.02093	0.000623813	0.0130361	-0.691497
SBK1	-2.76236	-0.340785	-6.55713	1.75474e-06	0.000155507	5.12352
PANX2	-2.76283	0.235839	-6.50697	1.95857e-06	0.000167913	5.01421
NGEF	-2.77282	2.12546	-3.57448	0.00180066	0.0271533	-1.72329
ENSG00000234460	-2.77361	-1.8452	-3.81898	0.00100891	0.0184697	-1.16074
IGDCC3	-2.77992	-2.22687	-5.65256	1.33453e-05	0.000720968	3.1059
RFPL4A	-2.79358	-2.31951	-3.22513	0.00408057	0.0456573	-2.51111
GIPC3	-2.80046	-1.30109	-3.78977	0.00108141	0.0192619	-1.2283
FRMD3	-2.80907	-2.70236	-3.48054	0.00224673	0.0314505	-1.93727
LRATD2	-2.84995	0.822113	-5.75664	1.05159e-05	0.000603329	3.34269
TNC	-2.85208	1.31616	-4.39296	0.000256883	0.00693894	0.178911
FBXL7	-2.85556	-1.03639	-4.99026	6.23108e-05	0.00243161	1.57724
ARX	-2.86072	-2.92112	-3.33786	0.00313884	0.0385973	-2.25941
GJA3	-2.86612	-0.528862	-8.36854	4.14849e-08	7.85592e-06	8.84126
ID4	-2.88282	-2.72798	-3.59396	0.00171969	0.0264421	-1.67874
ARMCX4	-2.88835	-1.93535	-5.65812	1.31762e-05	0.000715735	3.11857
DENND6B	-2.90628	-0.896295	-3.20383	0.00428708	0.047171	-2.55836
LAMC3	-2.91712	-0.435898	-10.2456	1.34243e-09	4.83005e-07	12.2162
ROR2	-2.92476	0.150473	-5.77016	1.01963e-05	0.000595356	3.37337
RPS6KA6	-2.9259	-0.284784	-3.62168	0.00161067	0.0253036	-1.61528
ASB2	-2.92964	-1.26512	-3.63582	0.00155771	0.024694	-1.58287
ENSG00000286790	-2.96601	0.189736	-5.85881	8.33231e-06	0.00052048	3.57405
ENSG00000258425	-2.97392	-1.54318	-3.45579	0.00238129	0.0321618	-1.99341
ENSG00000228137	-2.97768	-2.77373	-3.19462	0.00437956	0.0478375	-2.57877
ARHGAP29	-2.98113	0.820317	-4.24262	0.000367648	0.00906044	-0.173414
ADGRG1	-2.98758	-0.299236	-3.98809	0.000674611	0.0139177	-0.768034
PRUNE2	-2.98839	-1.01557	-5.34373	2.72425e-05	0.00125665	2.39731
HOXB-AS2	-2.99419	-2.84021	-3.3552	0.00301423	0.0378406	-2.22046
PRDM1	-3.01796	-1.46665	-4.09983	0.000516845	0.0114086	-0.507403
PNPLA3	-3.02211	-0.642719	-8.06472	7.54017e-08	1.23316e-05	8.2497
TSPAN7	-3.06371	-2.38131	-3.91	0.000812511	0.0157342	-0.949677
GSTM2	-3.06669	-2.29352	-4.34354	0.000289005	0.00763466	0.063035
SULT4A1	-3.07762	-0.682261	-4.19158	0.00041525	0.0098036	-0.292888
ENSG00000262884	-3.10826	-1.67872	-3.2437	0.00390848	0.0446698	-2.46985
CFAP58	-3.10981	-1.69187	-5.32783	2.82689e-05	0.00130066	2.36062
ABCA1	-3.11138	0.468979	-4.91926	7.3663e-05	0.00275509	1.41159
PCAT1	-3.12094	-2.2873	-3.5749	0.00179887	0.0271533	-1.72233
NOTCH3	-3.1267	0.883796	-7.26378	3.86477e-07	4.54426e-05	6.62797
AP1G2-AS1	-3.12674	-0.677155	-5.18204	3.9724e-05	0.00172201	2.02322
BRSK2	-3.12767	-0.386819	-8.12605	6.67682e-08	1.11218e-05	8.37016
ZNF793	-3.15592	2.06669	-7.5372	2.19096e-07	2.77573e-05	7.1917
CEND1	-3.17698	-1.65271	-4.33061	0.000298053	0.00781629	0.0327313
ENSG00000256013	-3.1771	-1.42151	-7.32688	3.38727e-07	4.06247e-05	6.759
C1RL	-3.20874	-2.77188	-4.46167	0.000218095	0.00606419	0.340026
ERRFI1	-3.20881	6.26135	-8.604	2.6328e-08	5.57224e-06	9.29082
FAM131B	-3.21212	-2.2387	-6.96679	7.2409e-07	7.61777e-05	6.00389
LAYN	-3.21328	1.77874	-11.399	2.00014e-10	9.22627e-08	14.0671
SPP1	-3.22707	2.62289	-6.98198	7.01008e-07	7.41832e-05	6.03611
GNAZ	-3.22975	-0.0569977	-9.27914	7.43647e-09	1.99675e-06	10.5375
ENSG00000286999	-3.25892	-0.626886	-4.24828	0.000362719	0.00898804	-0.160163
OPRL1	-3.26476	-0.485272	-5.15224	4.25945e-05	0.00181153	1.95407
FER1L4	-3.29337	1.74543	-5.39248	2.43248e-05	0.00116123	2.50973
ID2-AS1	-3.3015	-0.39878	-10.2683	1.29107e-09	4.83005e-07	12.2543
COL13A1	-3.30964	-0.727085	-4.4972	0.000200401	0.00566857	0.423363
PREX1	-3.31145	0.764118	-5.75627	1.05248e-05	0.000603329	3.34185
MAP1A	-3.31555	1.38076	-10.4304	9.79789e-10	3.83183e-07	12.5236
PTPRS	-3.32706	-2.85002	-6.66307	1.39282e-06	0.000127841	5.3533
FLRT2	-3.32932	-4.14006	-7.01696	6.5069e-07	6.96781e-05	6.11016
ENSG00000226890	-3.33496	-2.9579	-3.1832	0.00449684	0.0487338	-2.60404
ACOX2	-3.36535	-0.605077	-5.92571	7.15906e-06	0.00045599	3.72494
CEACAM19	-3.36589	0.591888	-9.2477	7.87738e-09	2.05383e-06	10.4808
PPP2R2C	-3.37828	0.783128	-11.5758	1.51248e-10	7.16042e-08	14.3371
EFHD1	-3.39034	-1.11719	-6.25349	3.42935e-06	0.000262247	4.45696
ENSG00000287271	-3.39038	-0.159945	-8.4712	3.39941e-08	6.94455e-06	9.03822
BMERB1	-3.40208	0.461585	-6.86942	8.91867e-07	8.74213e-05	5.79666
CDCP1	-3.40362	5.36229	-5.95015	6.77372e-06	0.000441791	3.77996
PTPRZ1	-3.41115	0.355958	-4.48783	0.000204921	0.00577825	0.401392
PCSK5	-3.4157	-0.900016	-6.12506	4.56858e-06	0.000326146	4.17165
ZNF521	-3.41851	-1.38481	-5.08631	4.97161e-05	0.00205514	1.80087
MGAT3	-3.48262	-2.80211	-4.26789	0.000346146	0.00868503	-0.114241
ARL4C	-3.49141	1.68569	-4.60154	0.000156354	0.00485803	0.66803
ANK1	-3.52452	0.433782	-3.73875	0.00122065	0.0209734	-1.34612
TJP2	-3.52661	-2.53691	-3.69931	0.00134032	0.0223676	-1.43699
SYT17	-3.52856	1.15389	-5.77945	9.98242e-06	0.000588652	3.39444
SCARF1	-3.53815	0.860716	-15.694	4.95296e-13	4.53251e-10	19.7421
FBXO27	-3.53899	2.81411	-9.90747	2.41267e-09	7.89162e-07	11.6427
CDK18	-3.55393	-1.35453	-6.58468	1.65221e-06	0.000148415	5.18342
ENSG00000267992	-3.62495	-0.17326	-8.65537	2.38644e-08	5.16216e-06	9.38787
NEFM	-3.64316	-3.15655	-4.54252	0.000179911	0.00534092	0.529649
AP1G2	-3.64982	0.271125	-7.31766	3.4531e-07	4.0925e-05	6.73988
ENSG00000269896	-3.69535	-0.518593	-6.77431	1.09452e-06	0.000104182	5.59303
ERG	-3.69721	-2.97835	-4.99601	6.14736e-05	0.00240939	1.59063
SLIT3	-3.70348	-0.0102404	-7.70678	1.54861e-07	2.07302e-05	7.5361
TGFB1I1	-3.74975	0.716031	-6.86823	8.94136e-07	8.74213e-05	5.79414
ADAMTS13	-3.77538	-0.904648	-5.40307	2.37347e-05	0.00114168	2.5341
LPCAT2	-3.81061	-3.8534	-9.05676	1.12058e-08	2.72422e-06	10.1337
KCNJ12	-3.81908	-1.75627	-5.77722	1.00335e-05	0.000588652	3.38937
PMEPA1	-3.82559	-1.56409	-6.15285	4.29289e-06	0.000313991	4.23356
ZDHHC11	-3.83453	-1.0085	-8.43461	3.64887e-08	7.13512e-06	8.96819
MDGA1	-3.83975	-2.54199	-4.32792	0.000299967	0.00785503	0.02644
CYBA	-3.84057	3.28061	-5.09104	4.9167e-05	0.00203805	1.81187
PADI2	-3.87528	-2.33749	-6.25262	3.43599e-06	0.000262247	4.45504
IL7R	-3.89171	-0.850212	-5.09419	4.88041e-05	0.00202768	1.81921
TNFRSF1B	-3.93809	-1.70462	-4.21383	0.000393785	0.00945538	-0.240819
ENSG00000267886	-3.97981	-2.7454	-5.46431	2.05944e-05	0.0010263	2.67499
FMN2	-3.99266	-2.58916	-6.90403	8.28071e-07	8.32235e-05	5.87047
ENSG00000225399	-4.02002	-3.91598	-7.83846	1.18603e-07	1.72071e-05	7.8007
TMTC1	-4.04229	-1.28679	-6.15234	4.2978e-06	0.000313991	4.23242
EPHX2	-4.04762	-1.76973	-8.15872	6.25932e-08	1.08274e-05	8.43411
L1CAM	-4.04979	-2.69381	-5.69047	1.22344e-05	0.00067722	3.19227
CTNND2	-4.10785	-2.72356	-7.74732	1.42616e-07	2.00442e-05	7.61782
MIR4527HG	-4.17229	-3.04934	-5.53077	1.76628e-05	0.000892567	2.82747
PADI3	-4.17733	-2.67097	-3.98089	0.000686285	0.0140438	-0.784801
INSYN2B	-4.20793	-1.87593	-6.15222	4.29902e-06	0.000313991	4.23214
NKX2-5	-4.23866	-1.4991	-6.47478	2.10202e-06	0.000178374	4.94389
IHO1	-4.30545	-3.27597	-8.18592	5.9324e-08	1.05667e-05	8.48723
SFRP1	-4.37543	-1.03203	-6.60595	1.57728e-06	0.000143309	5.22959
CDK20	-4.40306	0.828835	-11.3679	2.10153e-10	9.45164e-08	14.0193
CACNA1A	-4.45106	-2.92135	-6.25882	3.38886e-06	0.000262247	4.46878
TMEM156	-4.47159	-0.992337	-6.91964	8.00842e-07	8.0939e-05	5.90372
VAT1L	-4.4719	-1.59959	-5.38347	2.4839e-05	0.0011782	2.48897
TUB	-4.49368	-3.69412	-9.3229	6.8651e-09	1.87126e-06	10.6161
FAM230C	-4.51977	-4.25486	-9.72853	3.30834e-09	1.00876e-06	11.3332
NEFL	-4.53496	0.476368	-5.63751	1.38144e-05	0.000732603	3.07158
SHISA3	-4.54955	-3.67808	-8.37937	4.06201e-08	7.77399e-06	8.8621
XDH	-4.5539	-2.83795	-7.0246	6.40205e-07	6.89658e-05	6.12631
SOX4	-4.57079	-1.94782	-7.72242	1.50015e-07	2.06012e-05	7.56765
MYRIP	-4.59403	-1.54345	-6.45079	2.2159e-06	0.000187155	4.8914
SMPD5	-4.59511	-2.84778	-6.30453	3.06159e-06	0.000244791	4.5698
NPAS2	-4.63962	-2.52515	-9.37082	6.2912e-09	1.74121e-06	10.702
HSD17B8	-4.7107	1.65764	-8.78256	1.8739e-08	4.16191e-06	9.62662
DOCK2	-4.74269	-2.32962	-4.81653	9.38993e-05	0.00329227	1.17154
SPATC1	-4.76945	-4.56368	-19.8874	4.75509e-15	1.0693e-11	23.8935
ADGRB1	-4.83364	1.8154	-9.73689	3.25961e-09	1.00876e-06	11.3478
ALCAM	-4.85589	-2.16177	-9.81848	2.82148e-09	9.06401e-07	11.4893
MIR2052HG	-4.88682	-4.05193	-7.94072	9.65647e-08	1.46364e-05	8.00453
ALPK2	-4.90543	0.0959023	-10.2567	1.31704e-09	4.83005e-07	12.2348
SYCE1	-4.93964	-2.72279	-5.46271	2.0671e-05	0.00102727	2.6713
ARHGEF4	-4.9904	0.563608	-11.6469	1.35307e-10	6.57885e-08	14.4446
TMEM88	-5.01248	-2.05095	-8.39551	3.93655e-08	7.6149e-06	8.89313
PPL	-5.05107	1.16778	-8.15131	6.35168e-08	1.08461e-05	8.41961
ENPP4	-5.07742	-4.51217	-18.9396	1.25233e-14	2.04813e-11	23.0504
CYP 20.00	-5.11245	-2.82514	-5.84803	8.53888e-06	0.000527885	3.54971
NAT16	-5.17364	-2.16759	-6.11278	4.6961e-06	0.000333057	4.14426
RPS6KA2	-5.18989	-4.54338	-15.68	5.03892e-13	4.53251e-10	19.7263
ANKEF1	-5.24348	-1.19251	-12.7915	2.4061e-11	1.49261e-08	16.1012
EHD3	-5.25371	0.750197	-19.0533	1.11246e-14	2.00132e-11	23.1542
ENSG00000232111	-5.29724	-4.60181	-43.275	6.33375e-22	1.13944e-17	35.2128
SUMO1P1	-5.32109	-4.20842	-10.0592	1.85142e-09	6.28435e-07	11.9019
ENSG00000284837	-5.35103	-4.24638	-11.8474	9.90856e-11	5.093e-08	14.7449
LINC01106	-5.43117	-2.32049	-7.52482	2.24749e-07	2.82744e-05	7.16641
GFRA1	-5.51975	-3.75546	-9.79751	2.92793e-09	9.24096e-07	11.453
TRIM71	-5.69725	-3.41213	-8.65015	2.41035e-08	5.16216e-06	9.37803
ADPRH	-5.75959	-4.12682	-22.2273	5.15273e-16	2.31744e-12	25.7768
ENSG00000267257	-5.84496	-1.81952	-6.26438	3.34722e-06	0.000262247	4.48108
BMP7	-6.08222	-4.22844	-20.28	3.22298e-15	8.28305e-12	24.2284
TNFRSF8	-6.19963	-2.65445	-8.98279	1.28609e-08	3.08491e-06	9.99793
SORCS2	-6.34097	-3.09903	-8.3569	4.24364e-08	7.95241e-06	8.81882
NAP1L2	-6.37551	-2.08089	-8.14286	6.45862e-08	1.08589e-05	8.40307
ZC3HAV1L	-6.41147	-4.22961	-14.0961	3.87406e-12	2.90393e-09	17.8296
FAIM	-6.45072	-1.12147	-10.5041	8.65086e-10	3.45842e-07	12.645
MGMT	-6.67335	-3.19217	-12.2695	5.20811e-11	3.02238e-08	15.3629
RIPK4	-6.69457	-4.36892	-32.1777	2.81917e-19	2.53585e-15	31.49
RTL6	-6.81294	-3.8326	-18.0911	3.09428e-14	4.28201e-11	22.2516
GAGE1	-7.00502	-2.58034	-8.46572	3.4356e-08	6.94455e-06	9.02775
FTCD	-7.18339	1.29518	-10.9761	3.95305e-10	1.69322e-07	13.4069
NDRG1	-7.21876	-4.05513	-17.0311	1.01122e-13	1.21279e-10	21.1906
MAGI2-AS3	-7.31123	-3.39911	-11.2496	2.53901e-10	1.11407e-07	13.8362
LDHAL6FP	-7.71947	-4.07117	-24.7846	5.74204e-17	3.44331e-13	27.5579
GALNT14	-7.77285	-2.87165	-14.5461	2.13001e-12	1.66604e-09	18.3898
NETO1	-8.01868	-3.79149	-16.1784	2.74932e-13	2.90943e-10	20.2819
PIK3CG	-8.28945	-3.49437	-15.889	3.90042e-13	3.89826e-10	19.9616
IL13RA2	-8.62719	-1.86678	-12.1147	6.57986e-11	3.58702e-08	15.1385
SOX9	-9.55881	-3.07195	-15.2587	8.51859e-13	7.29759e-10	19.2418
